# Supplementary material for: Synthesis and Herbicidal Activity of Novel 1-(Diethoxy-phosphoryl)-3-(4-one-1H-1,2,3-triazol-1-yl)-propan-2-yl Carboxylic Esters
Source: PubMed Central journal article supplement (PMC6272695; doi:10.3390/molecules20011088), 2015-01-12

# Supplementary Materials

Figure S1. <sup>1</sup>H-NMR spectrum of compound 5-A1.

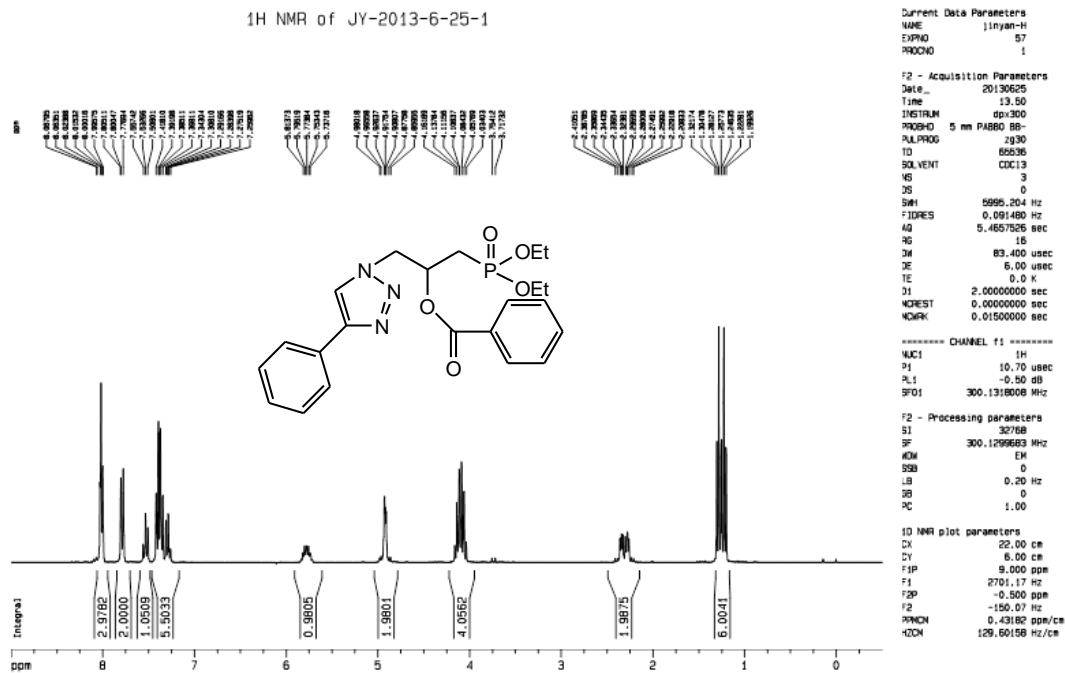

Figure S2. <sup>13</sup>C-NMR spectrum of compound 5-A1.

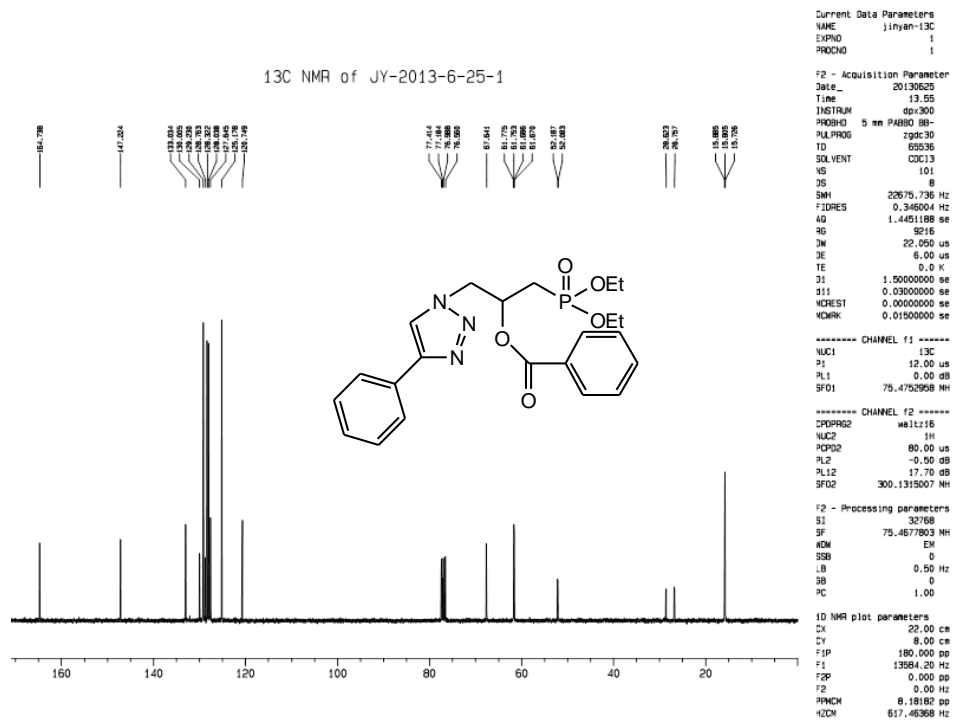

Figure S3.  $^{31}\text{P}$ -NMR spectrum of compound 5-A1.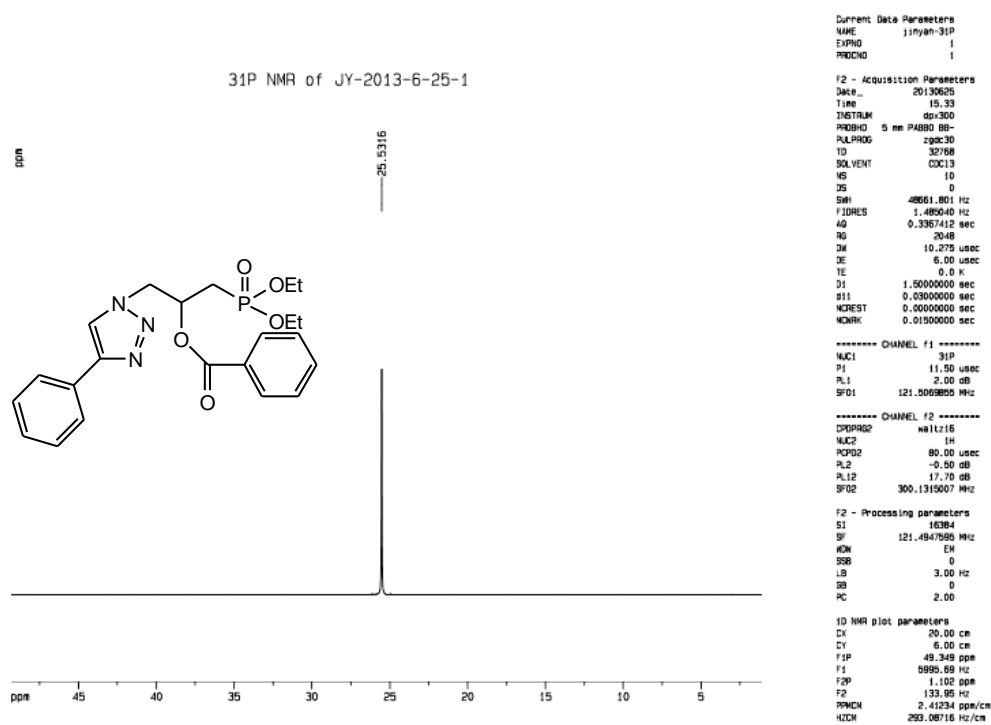

Figure S4. HRMS spectrum of compound 5-A1.

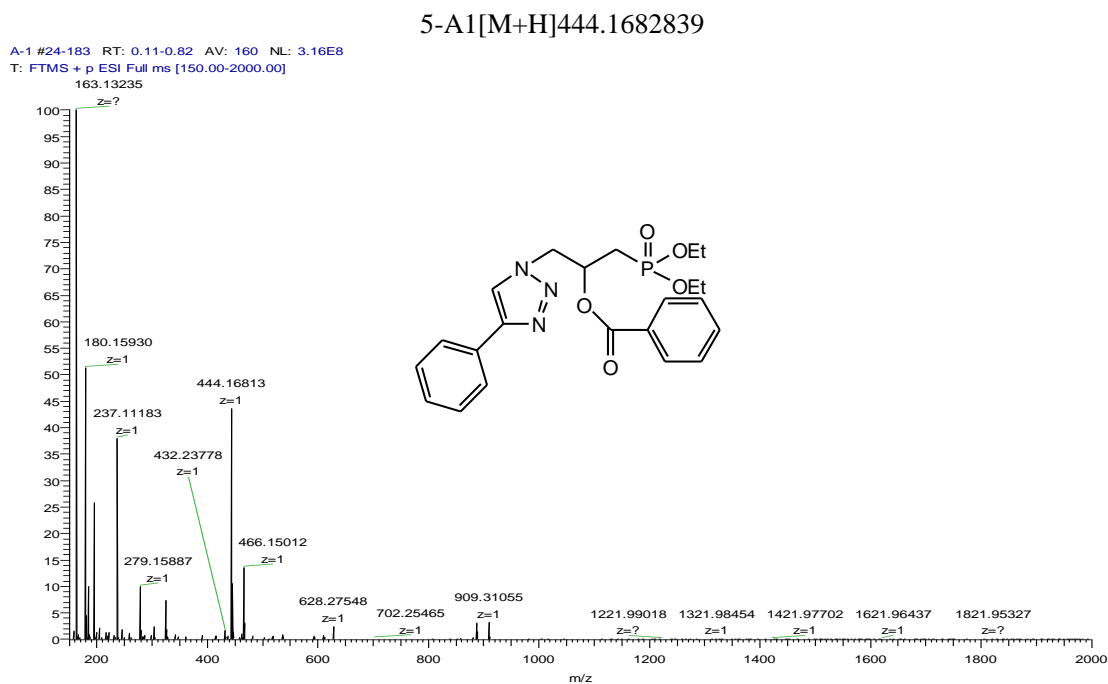

Figure S5. HRMS spectrum of compound 5-A1.

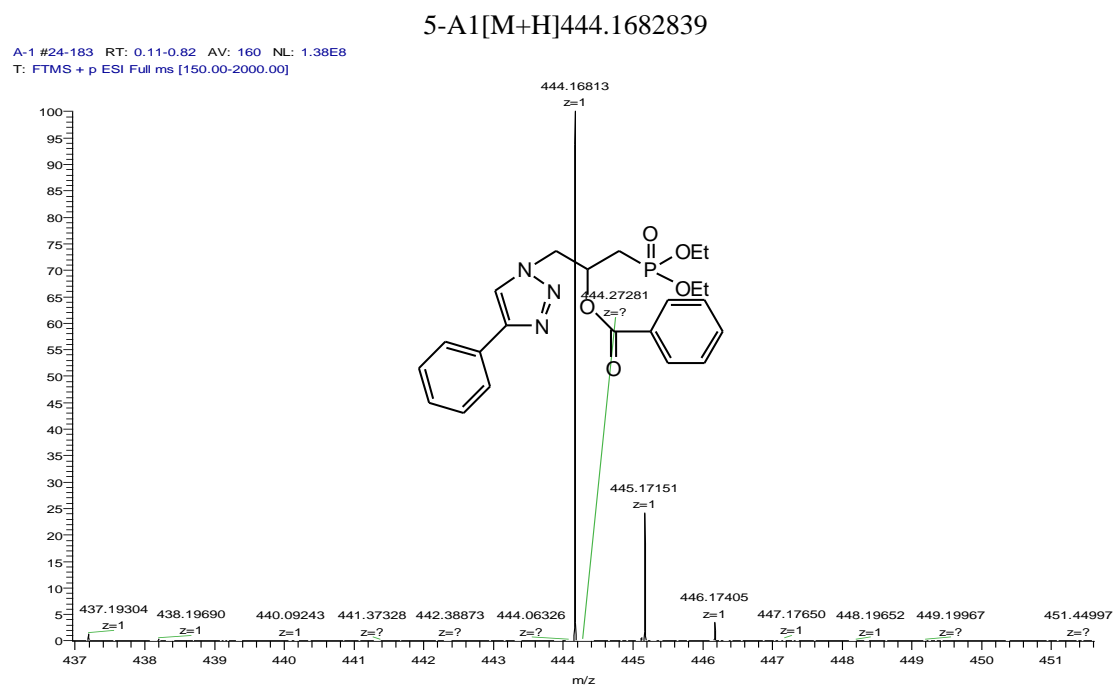Figure S6. <sup>1</sup>H-NMR spectrum of compound 5-A2.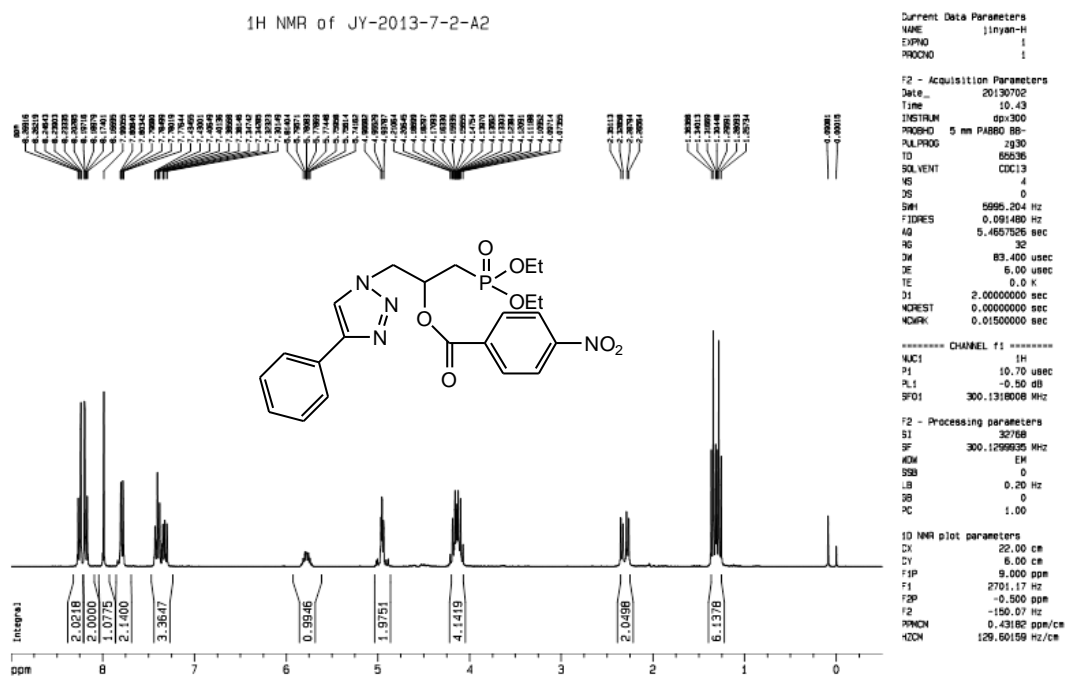

Figure S7.  $^{13}\text{C}$ -NMR spectrum of compound 5-A2.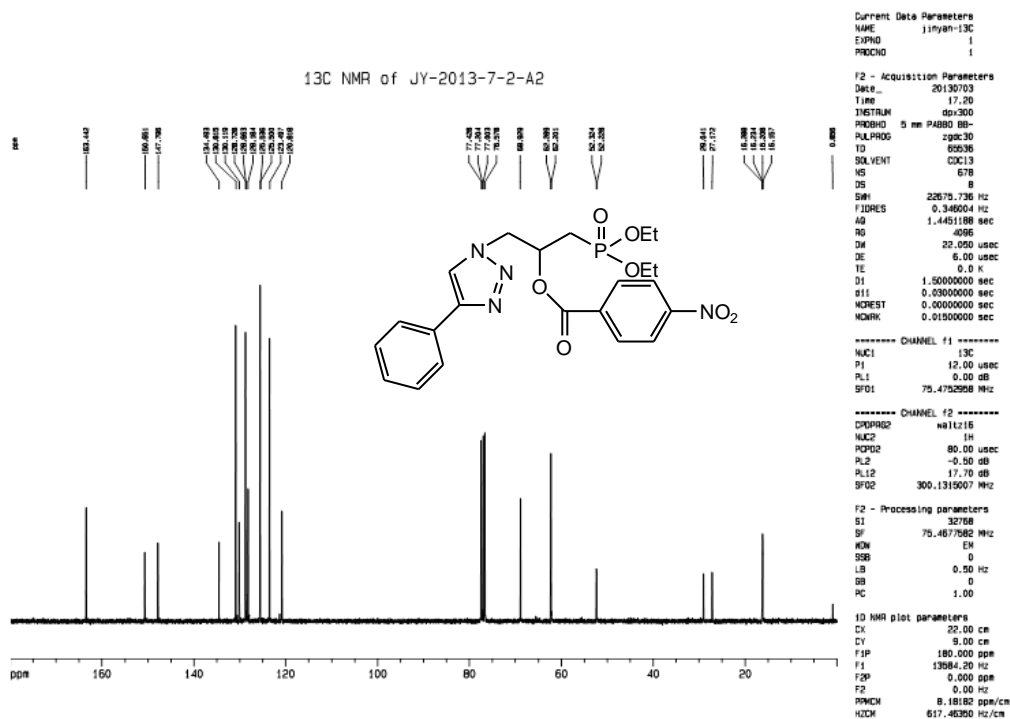Figure S8.  $^{31}\text{P}$ -NMR spectrum of compound 5-A2.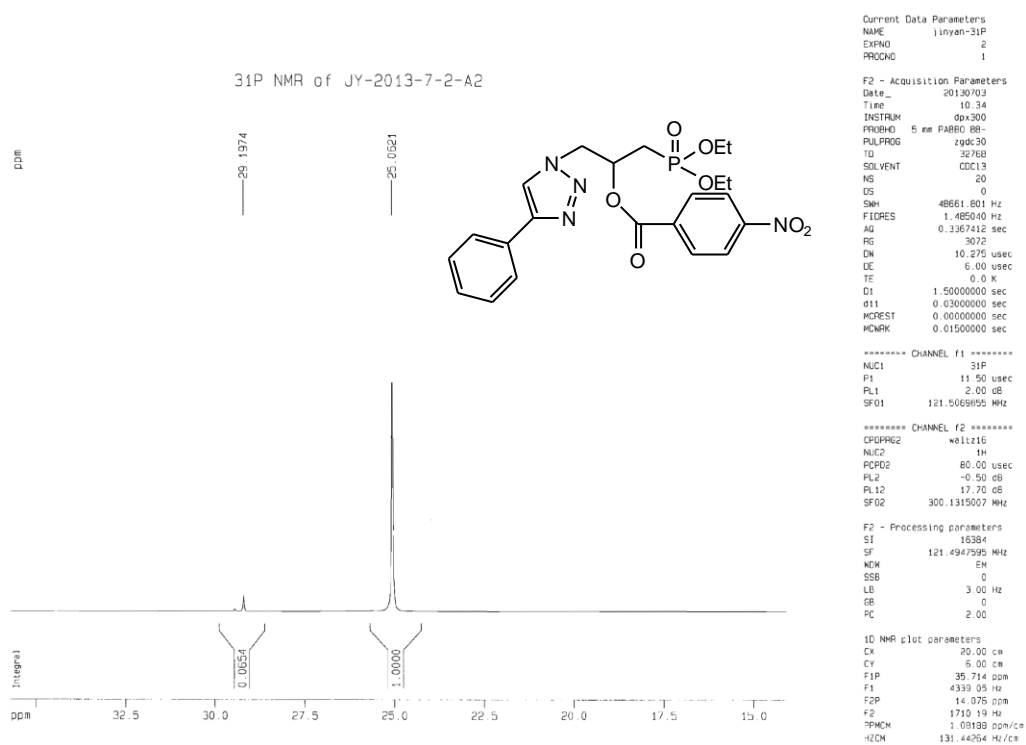

Figure S9. HRMS spectrum of compound 5-A2.

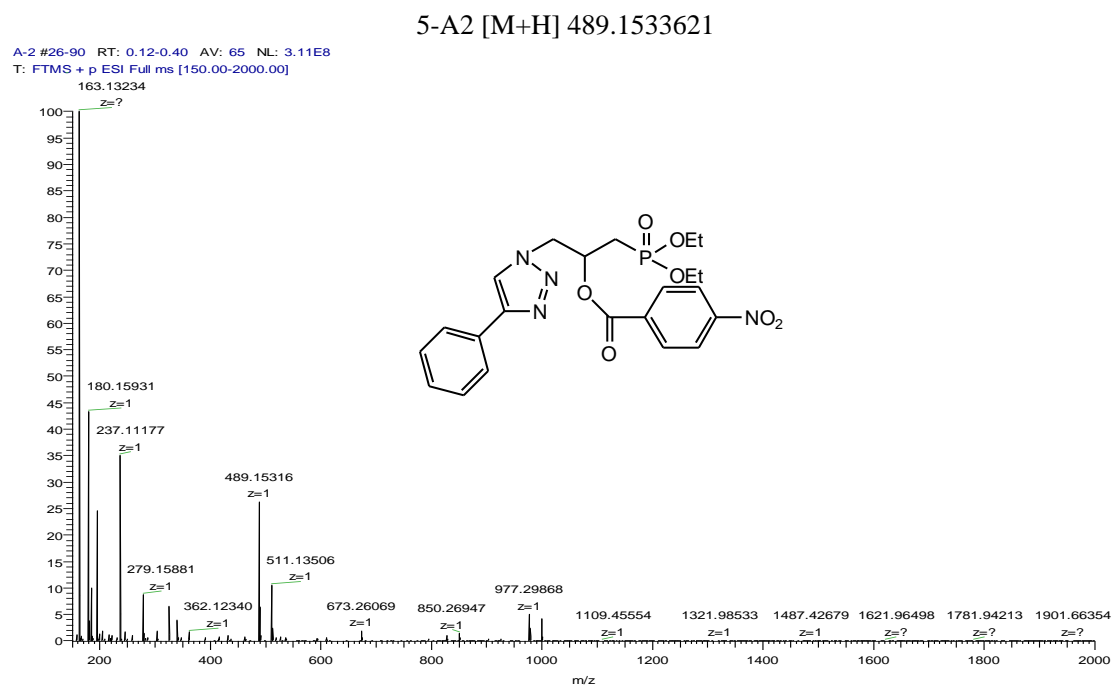

Figure S10. HRMS spectrum of compound 5-A2.

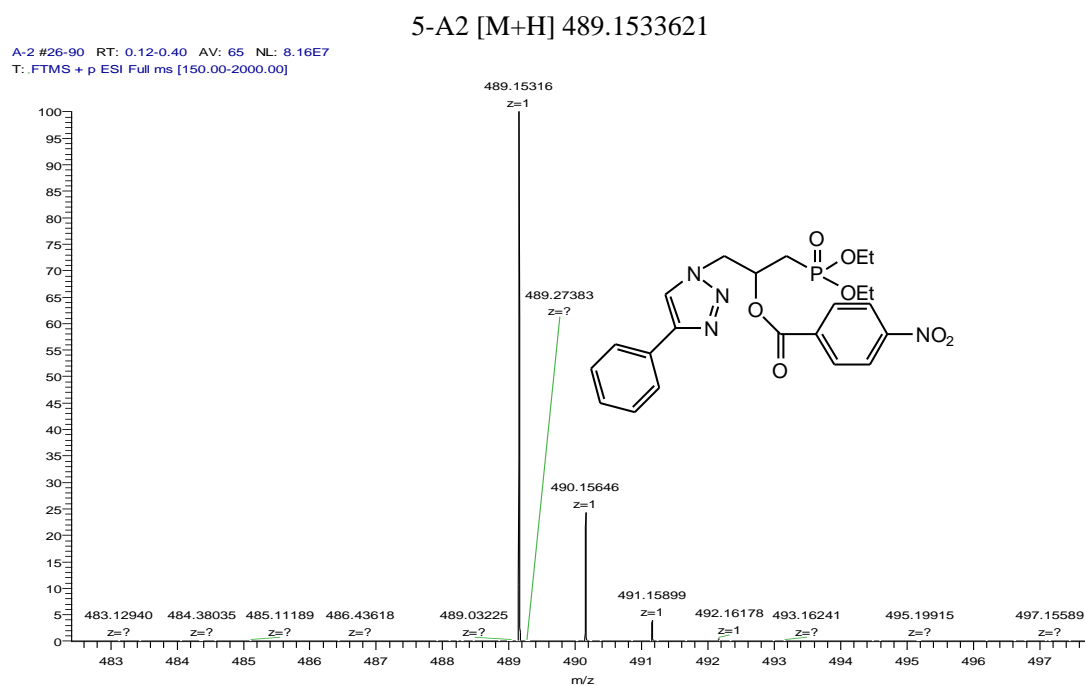

Figure S11. <sup>1</sup>H-NMR spectrum of compound 5-A3.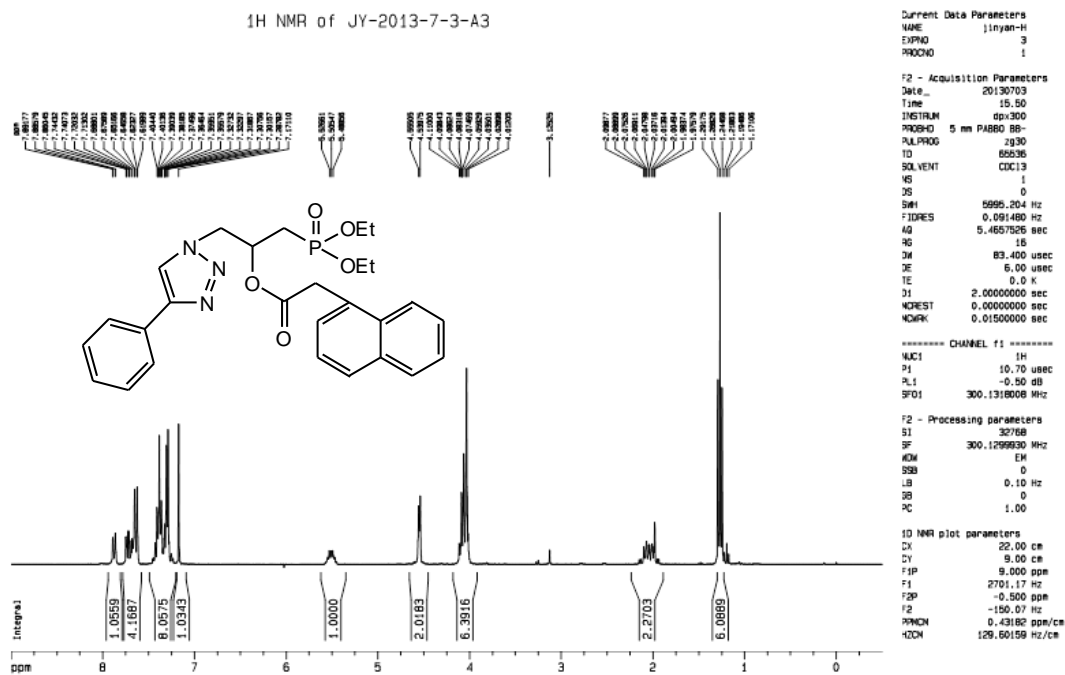Figure S12. <sup>13</sup>C-NMR spectrum of compound 5-A3.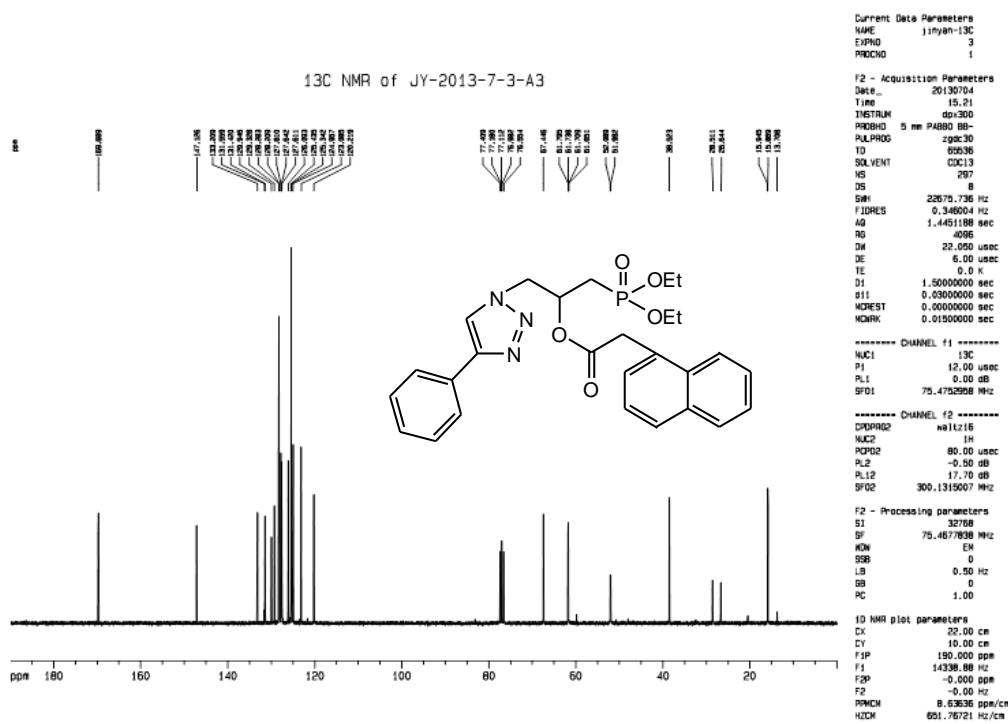

Figure S13.  $^{31}\text{P}$ -NMR spectrum of compound 5-A3.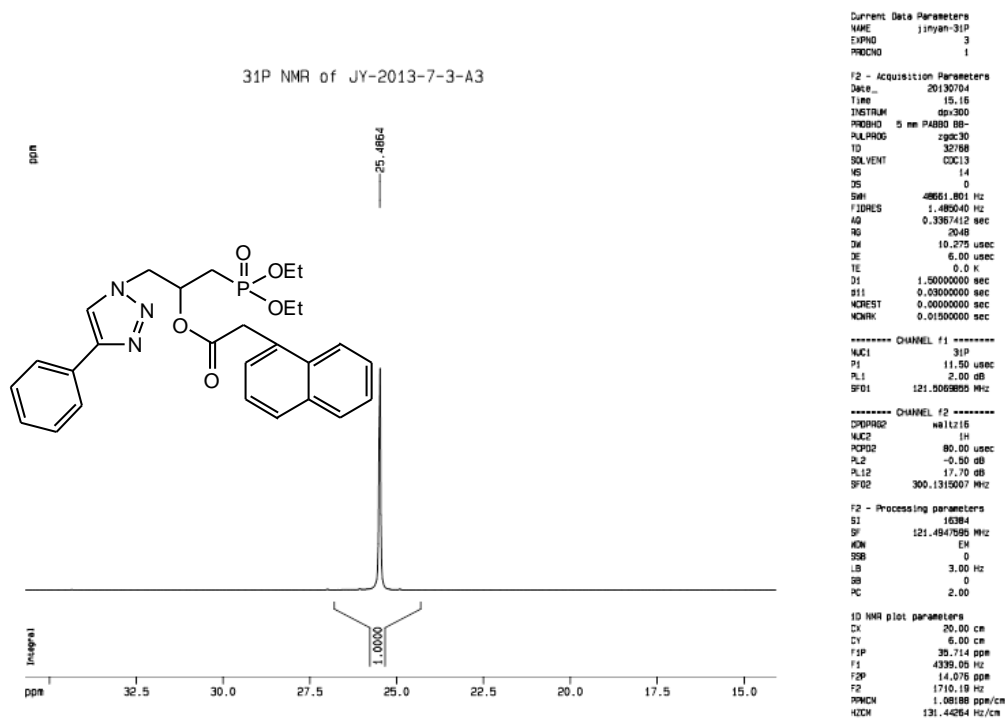

Figure S14. HRMS spectrum of compound 5-A3.

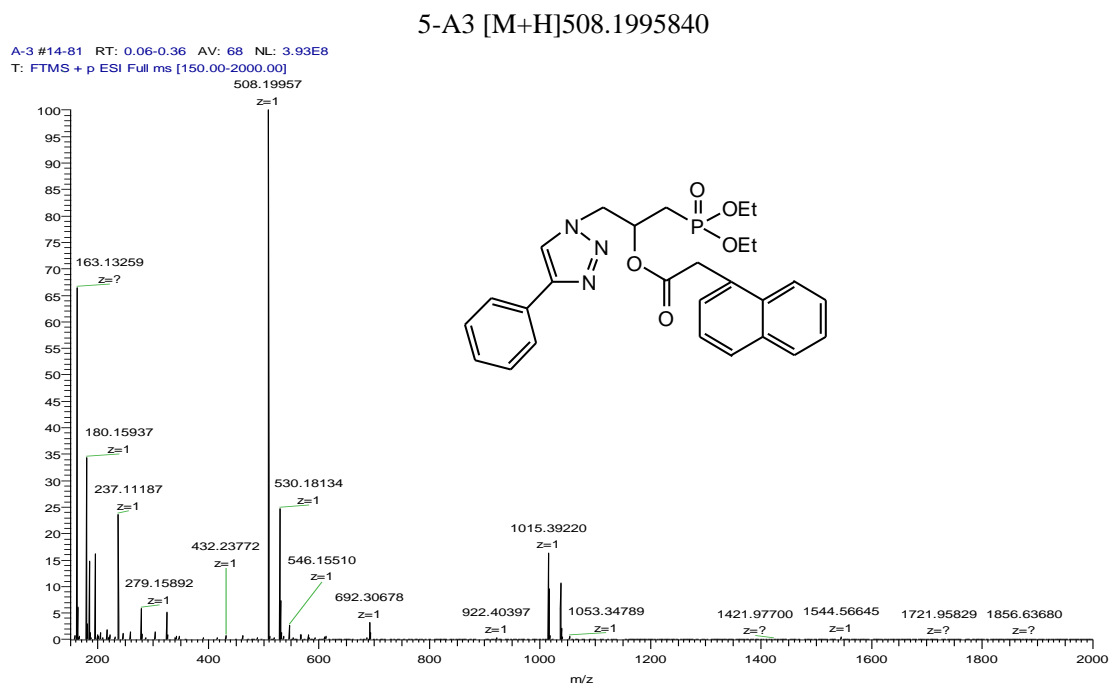

Figure S15. HRMS spectrum of compound 5-A3.

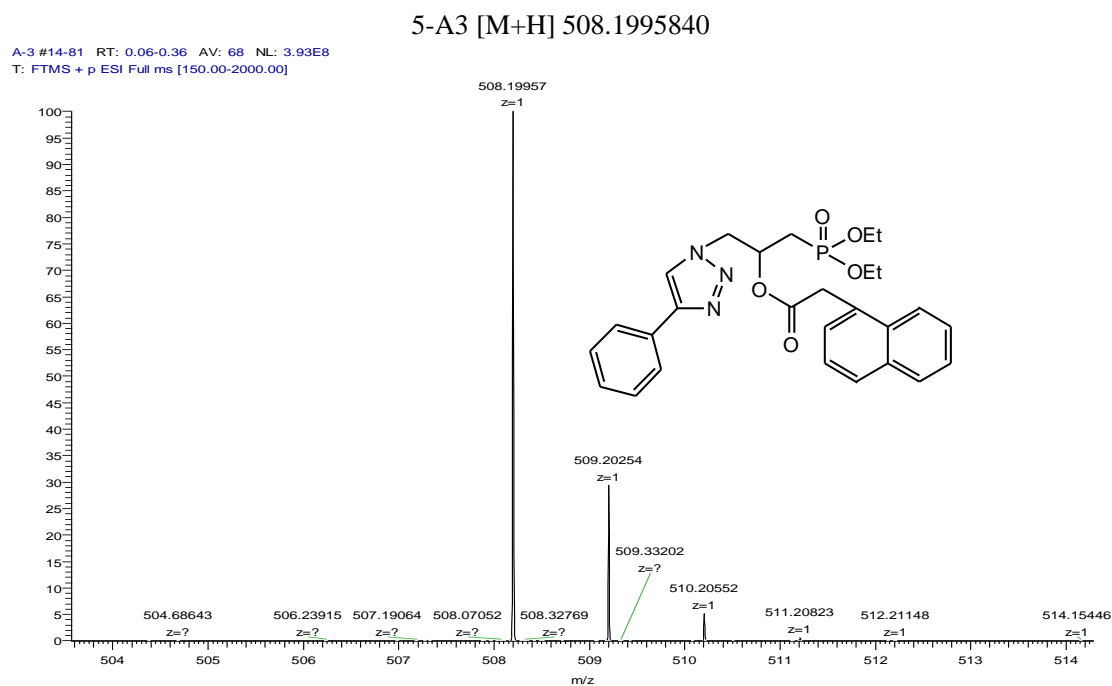Figure S16. <sup>1</sup>H-NMR spectrum of compound 5-A4.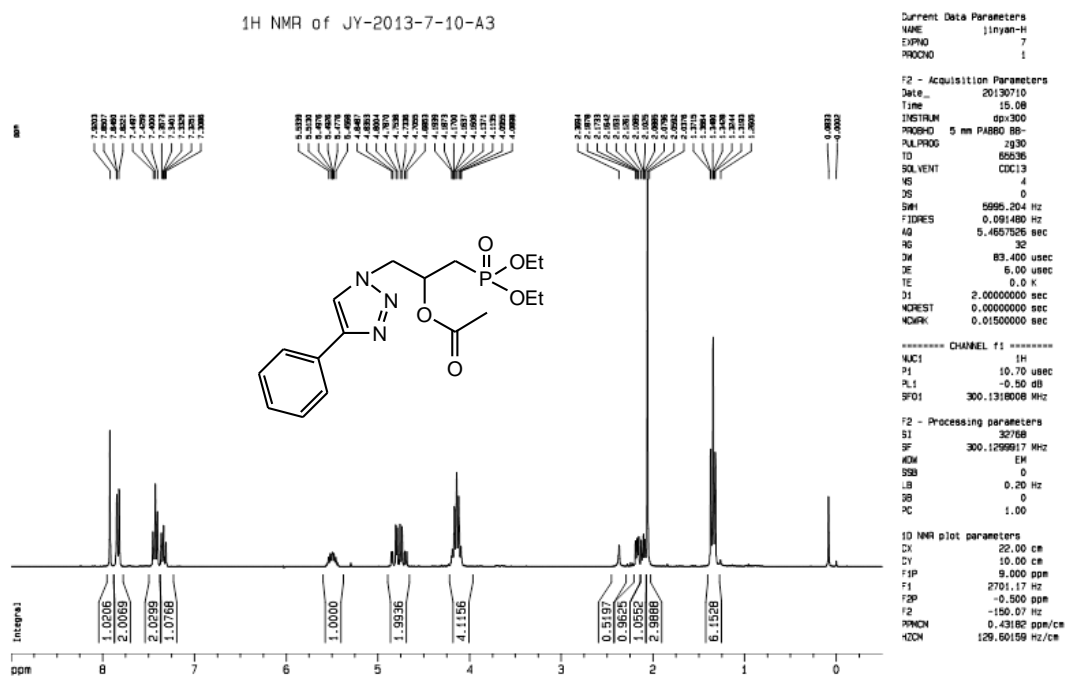



Figure S17.  $^{13}\text{C}$ -NMR spectrum of compound 5-A4.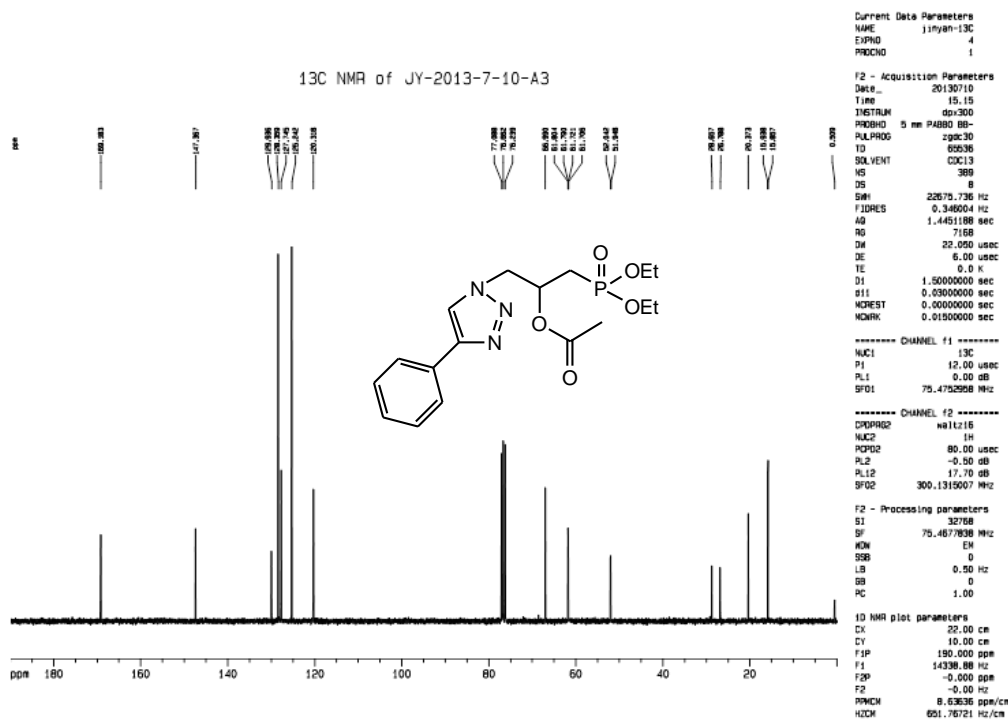Figure S18.  $^{31}\text{P}$ -NMR spectrum of compound 5-A4.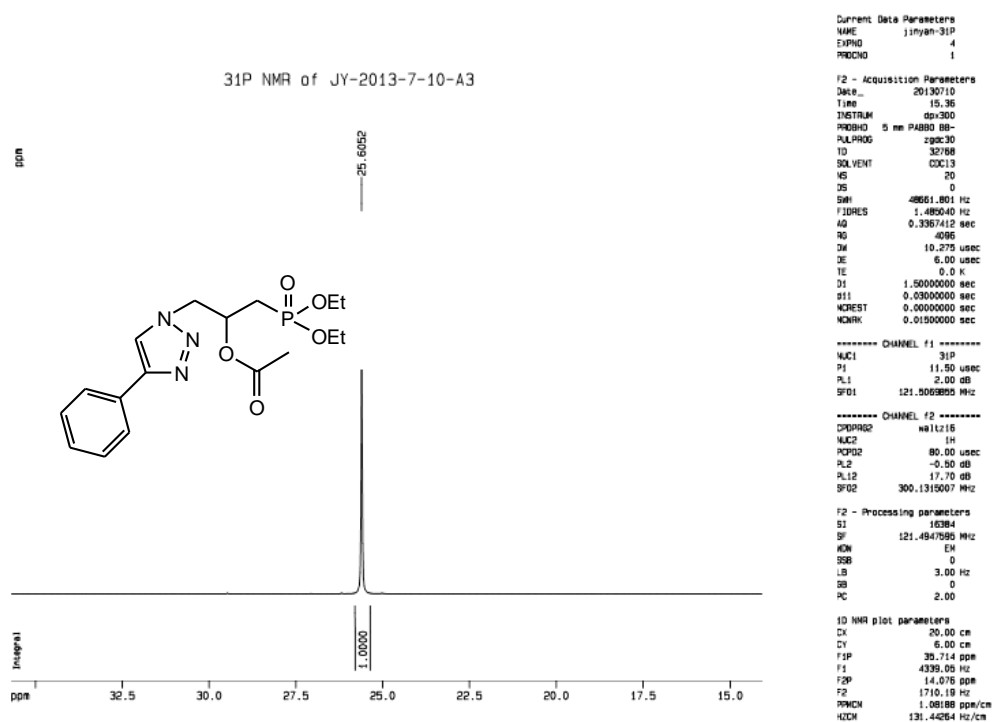

Figure S19. HRMS spectrum of compound 5-A4.

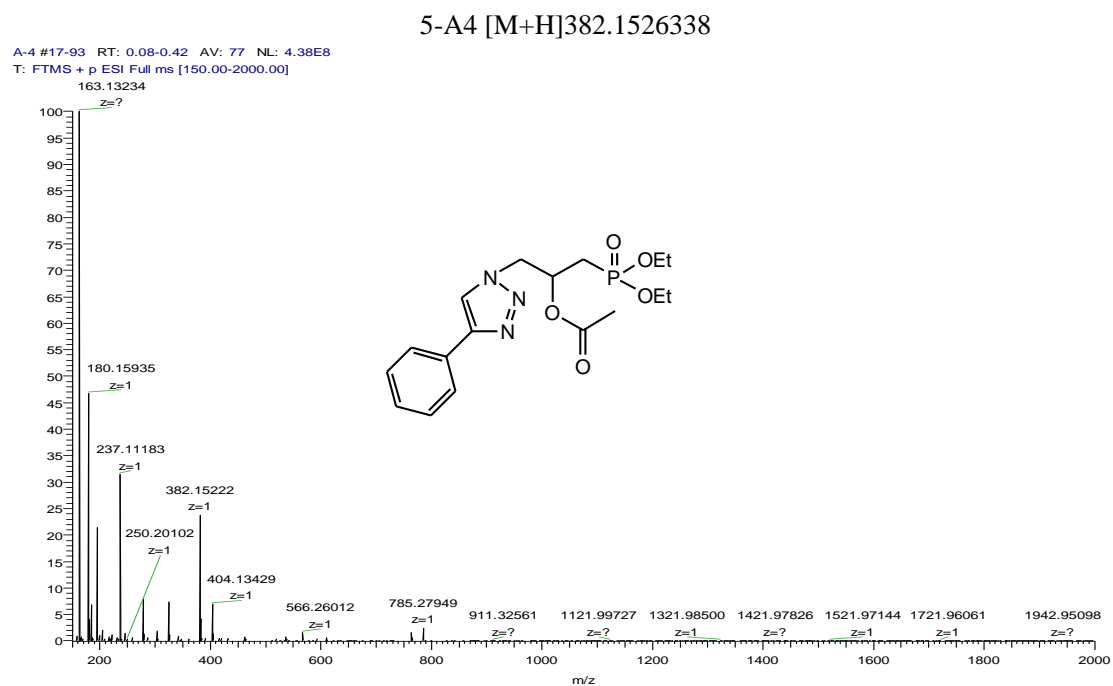

Figure S20. HRMS spectrum of compound 5-A4.

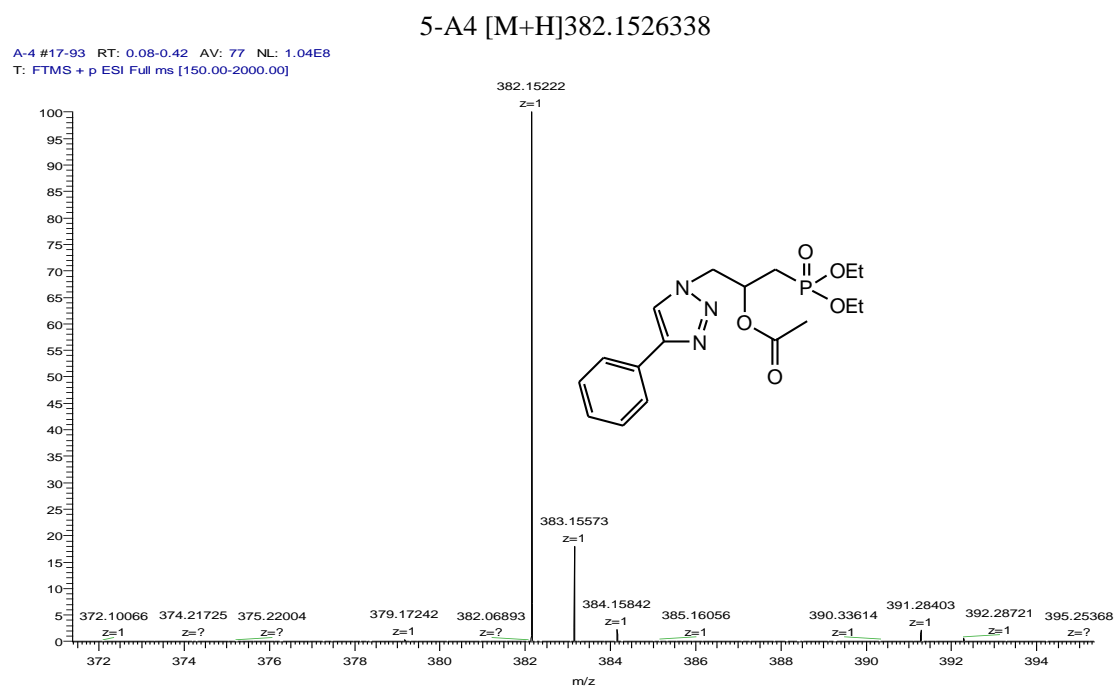

Figure S21. <sup>1</sup>H-NMR spectrum of compound 5-A5.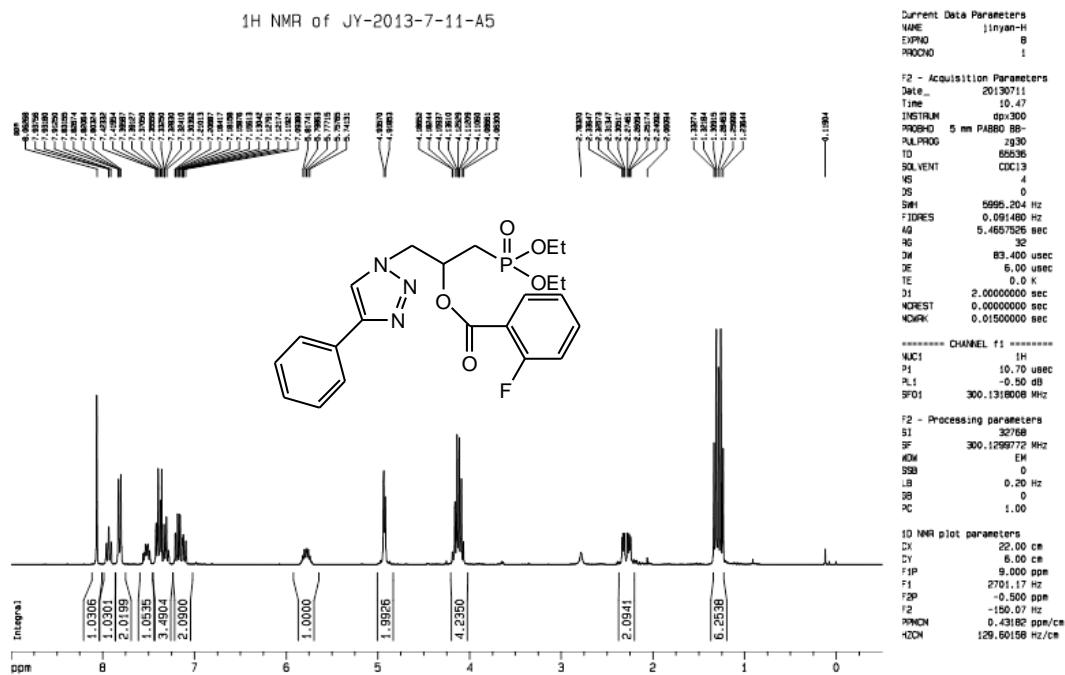Figure S22. <sup>13</sup>C-NMR spectrum of compound 5-A5.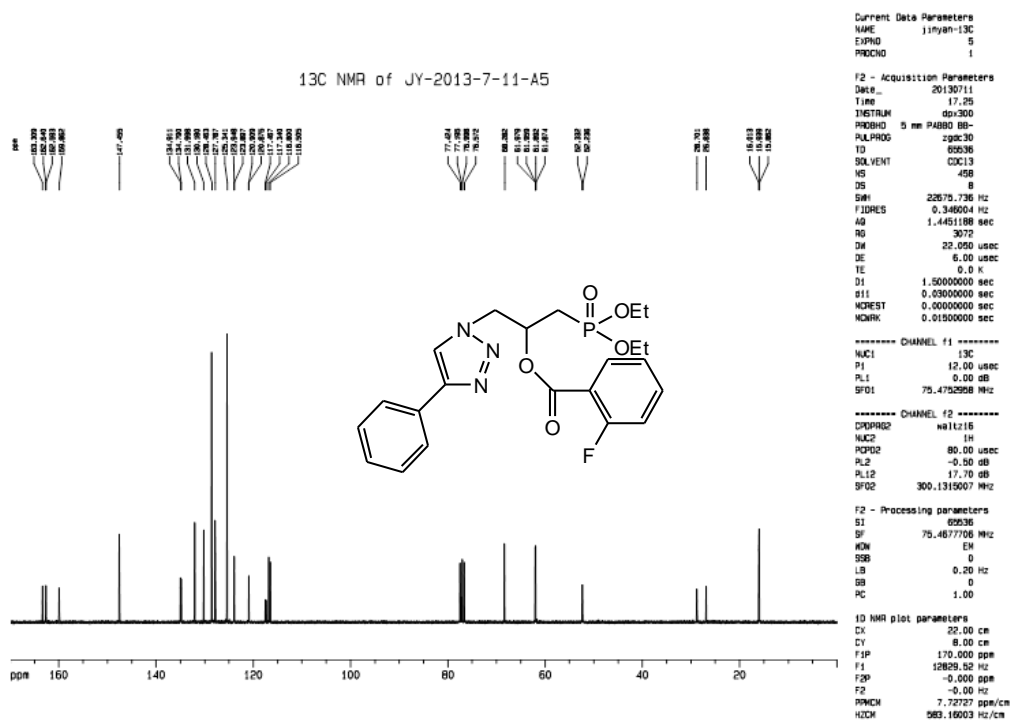

Figure S23. <sup>31</sup>P-NMR spectrum of compound 5-A5.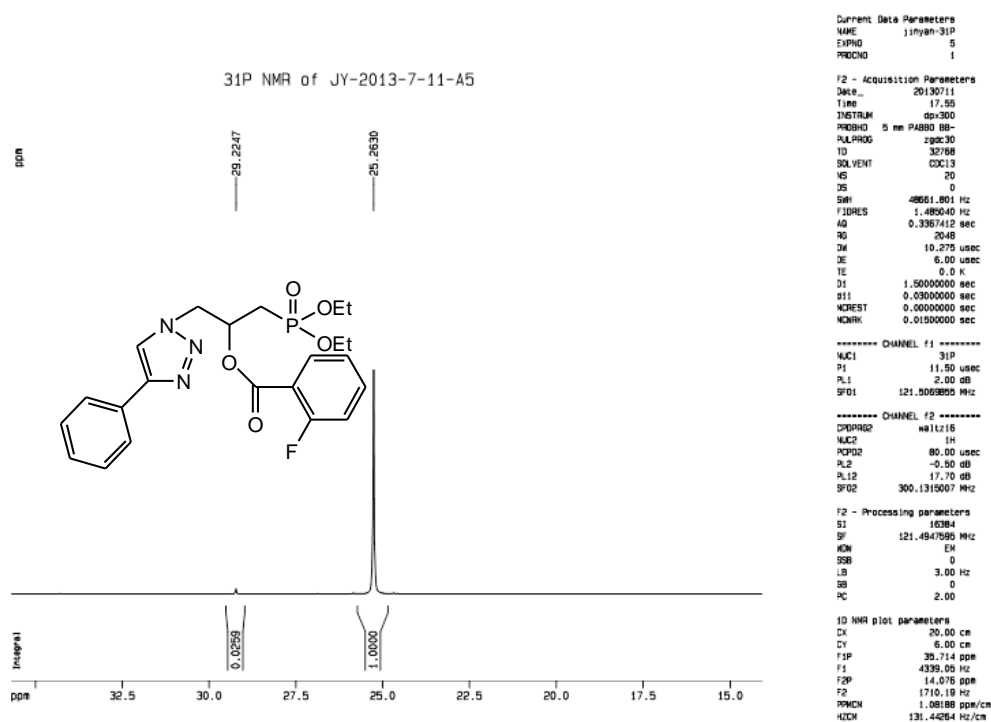

Figure S24. HRMS spectrum of compound 5-A5.

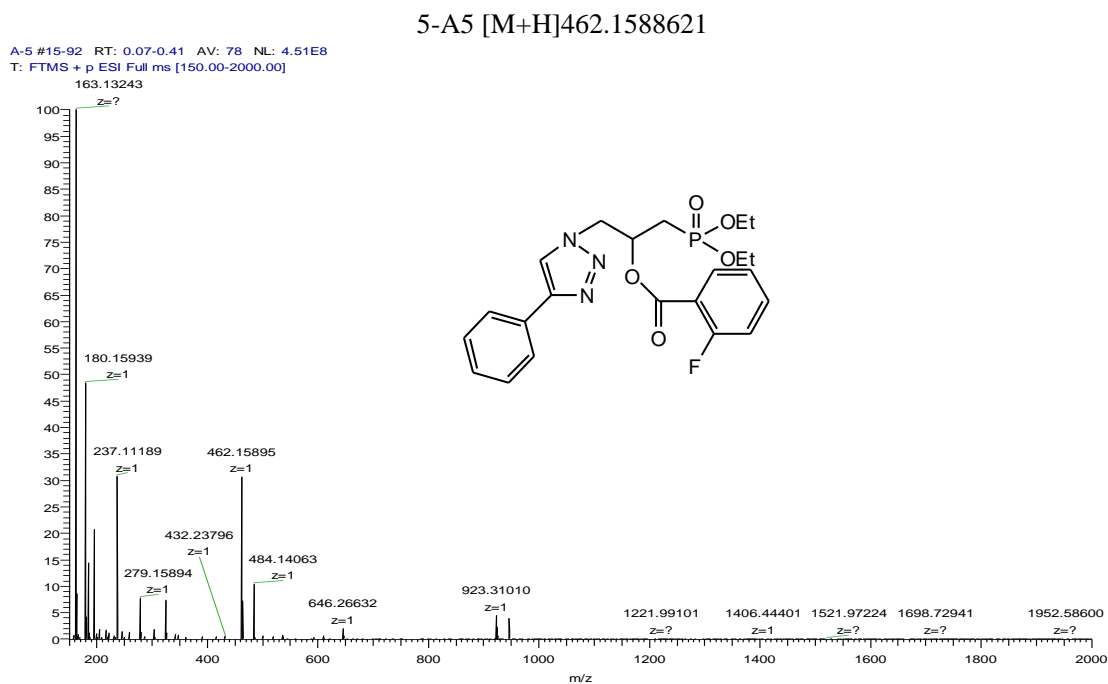

Figure S25. HRMS spectrum of compound 5-A5.

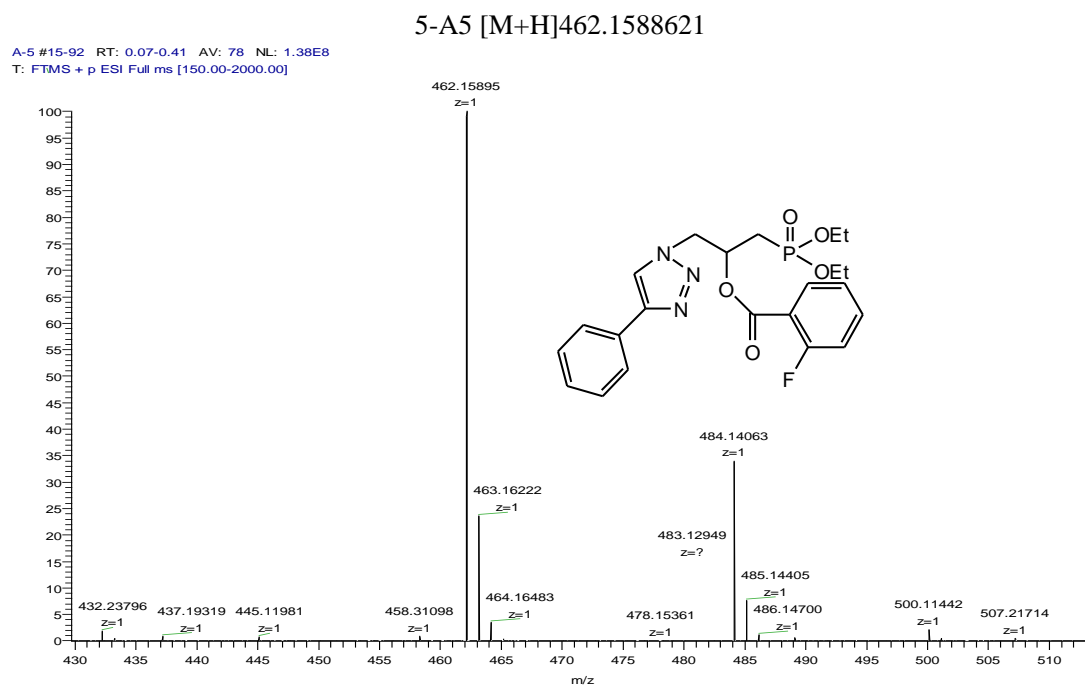Figure S26. <sup>1</sup>H-NMR spectrum of compound 5-A6.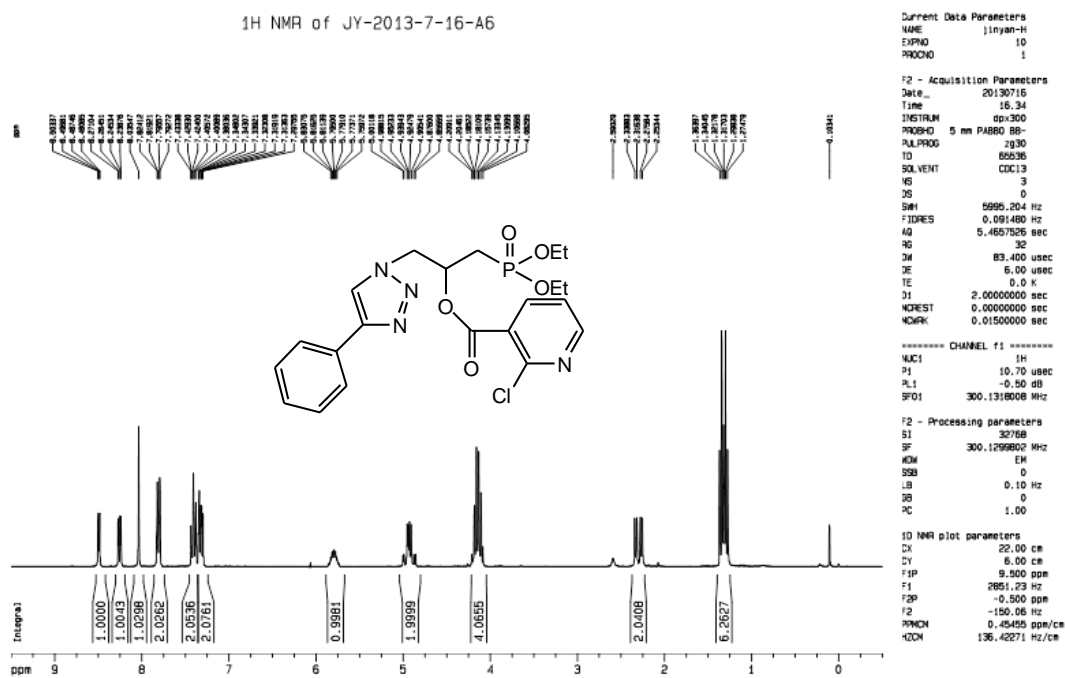

Figure S27.  $^{13}\text{C}$ -NMR spectrum of compound 5-A6.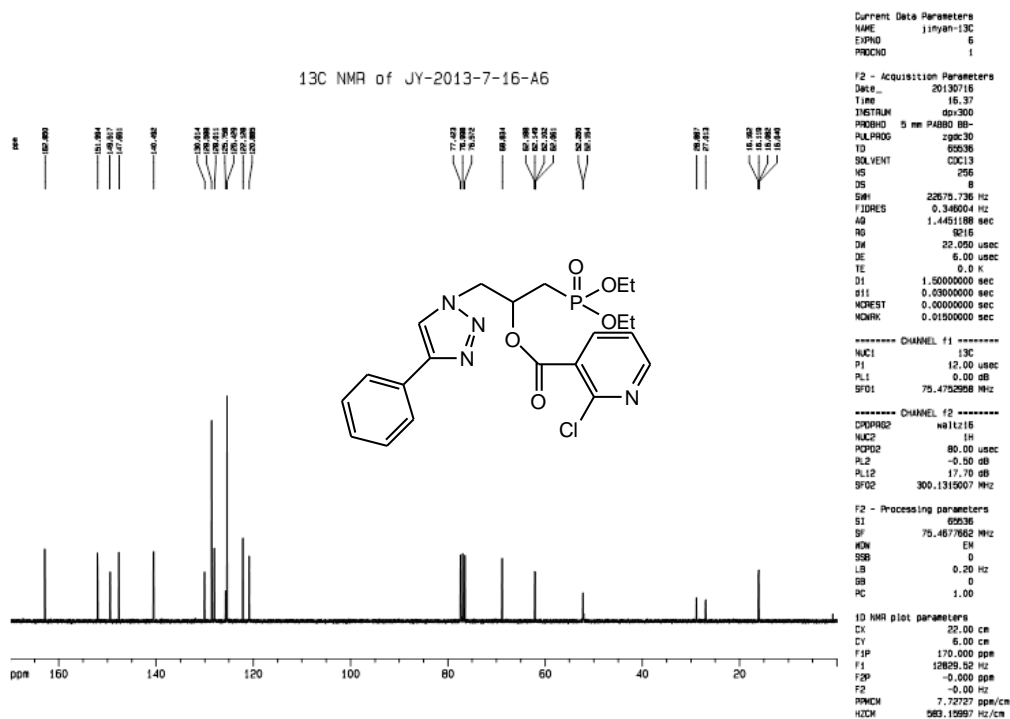Figure S28.  $^{31}\text{P}$ -NMR spectrum of compound 5-A6.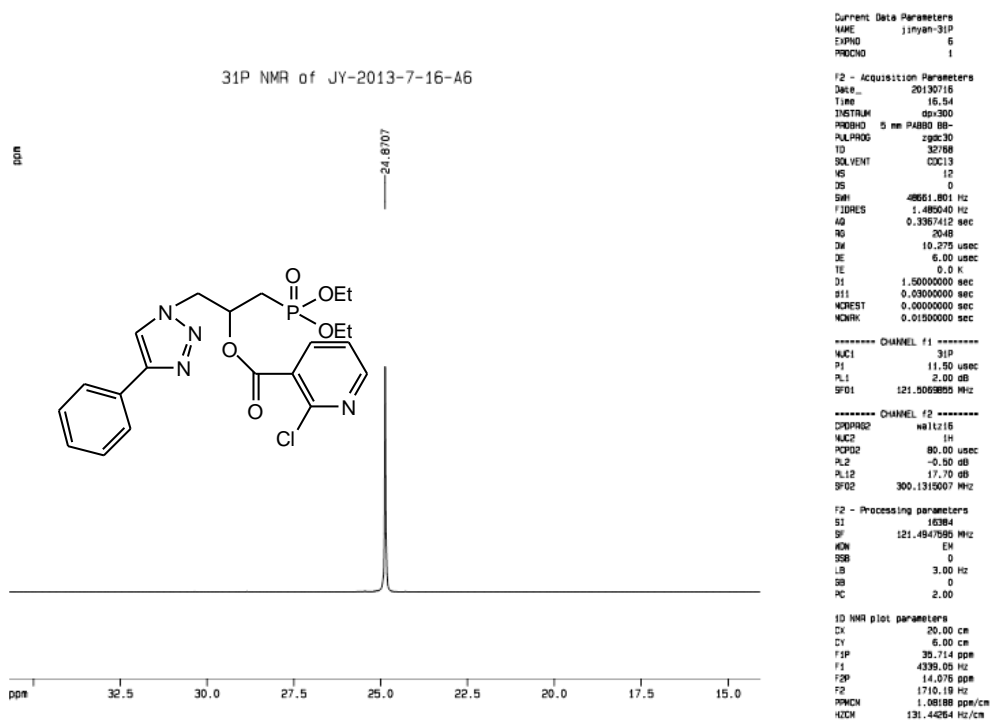

Figure S29. HRMS spectrum of compound 5-A6.

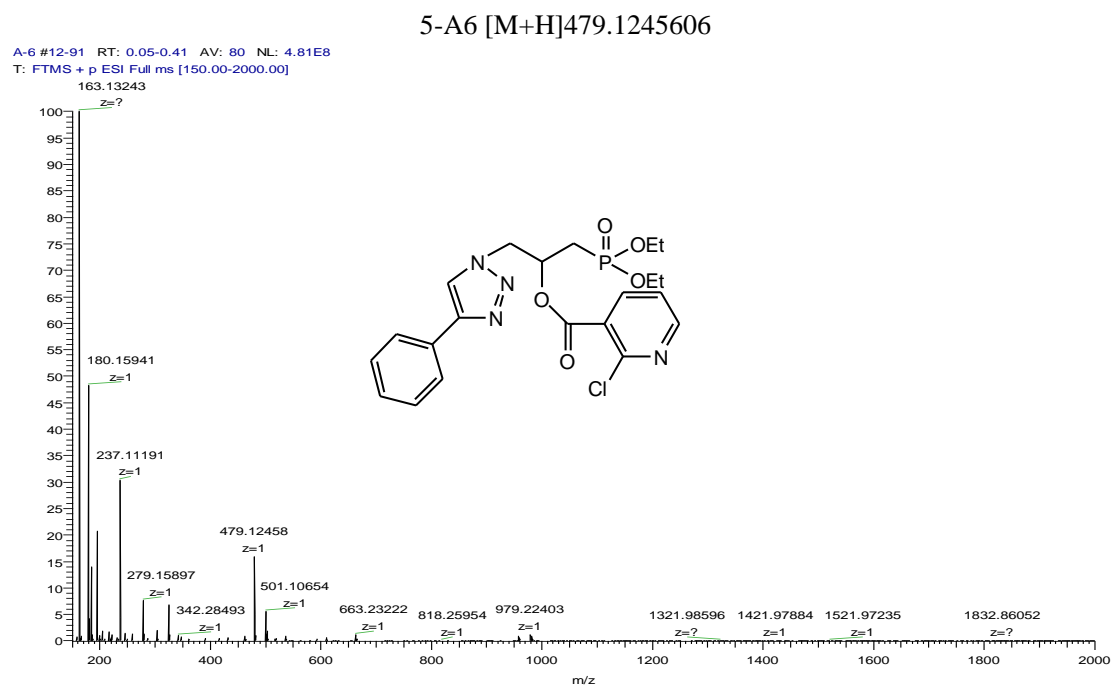

Figure S30. HRMS spectrum of compound 5-A6.

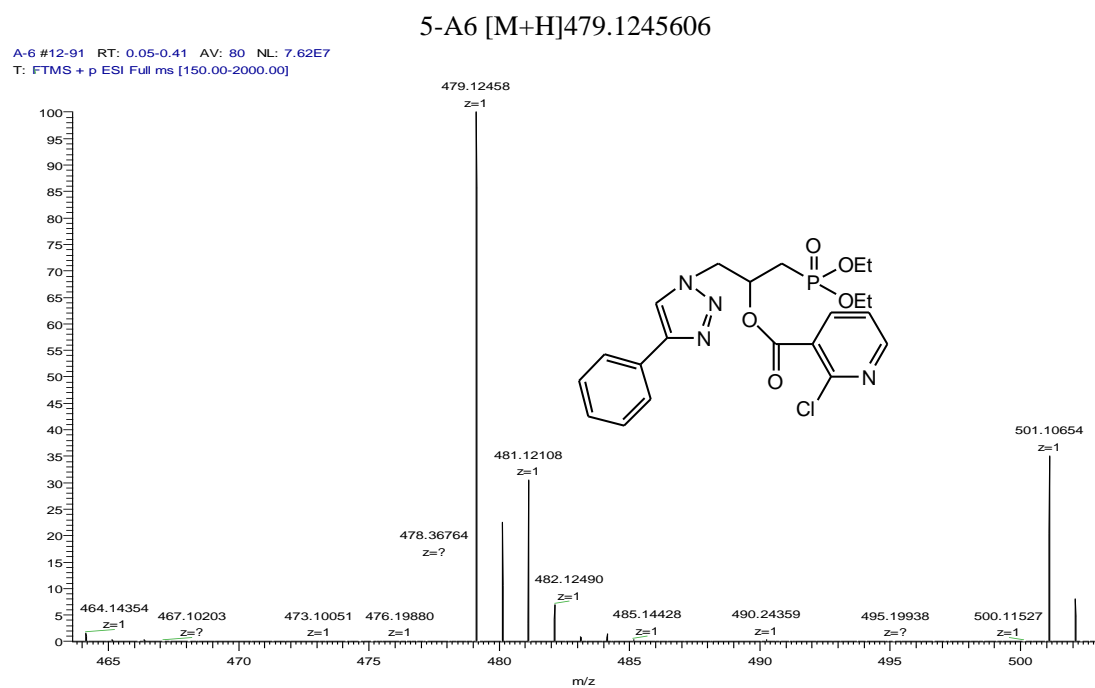

Figure S31. <sup>1</sup>H-NMR spectrum of compound 5-A7.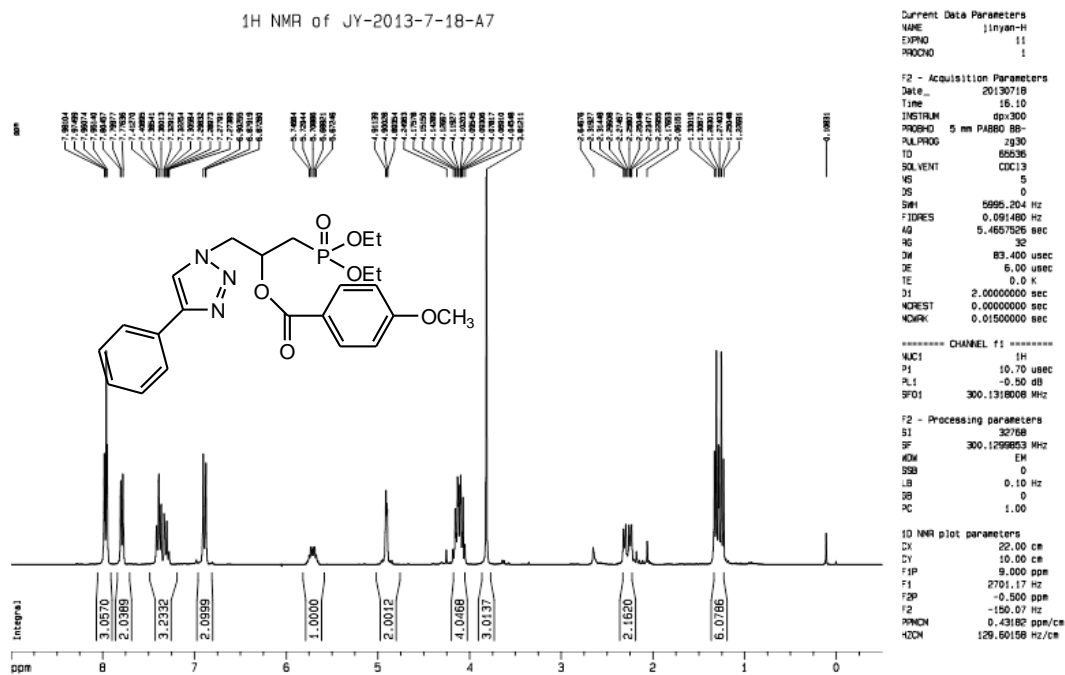Figure S32. <sup>13</sup>C-NMR spectrum of compound 5-A7.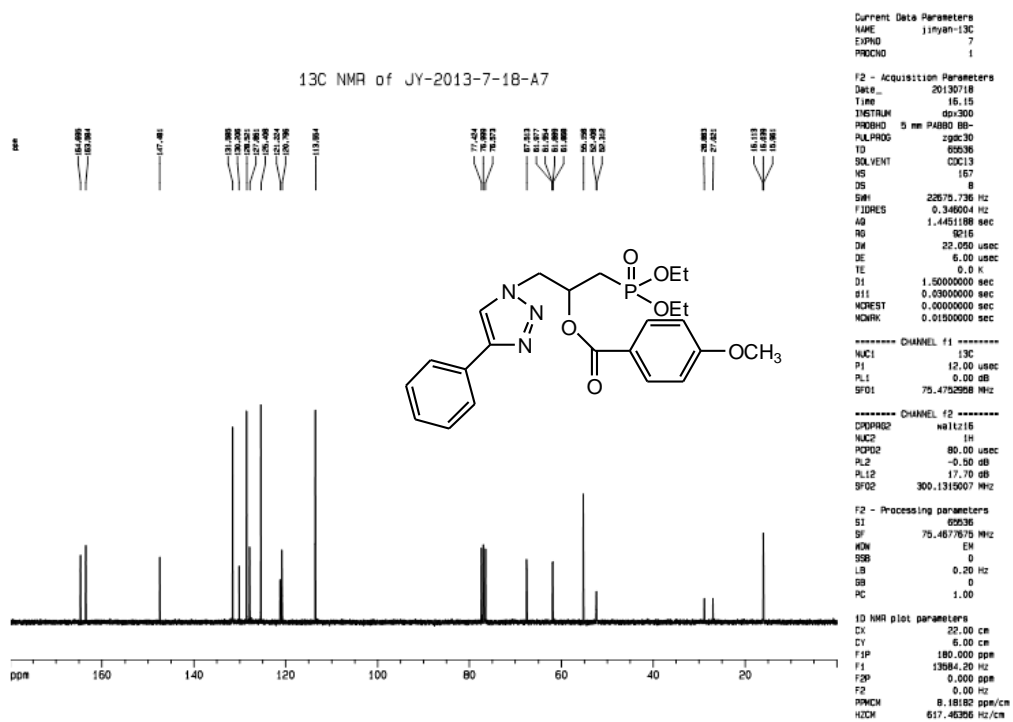



Figure S33.  $^{31}\text{P}$ -NMR spectrum of compound 5-A7.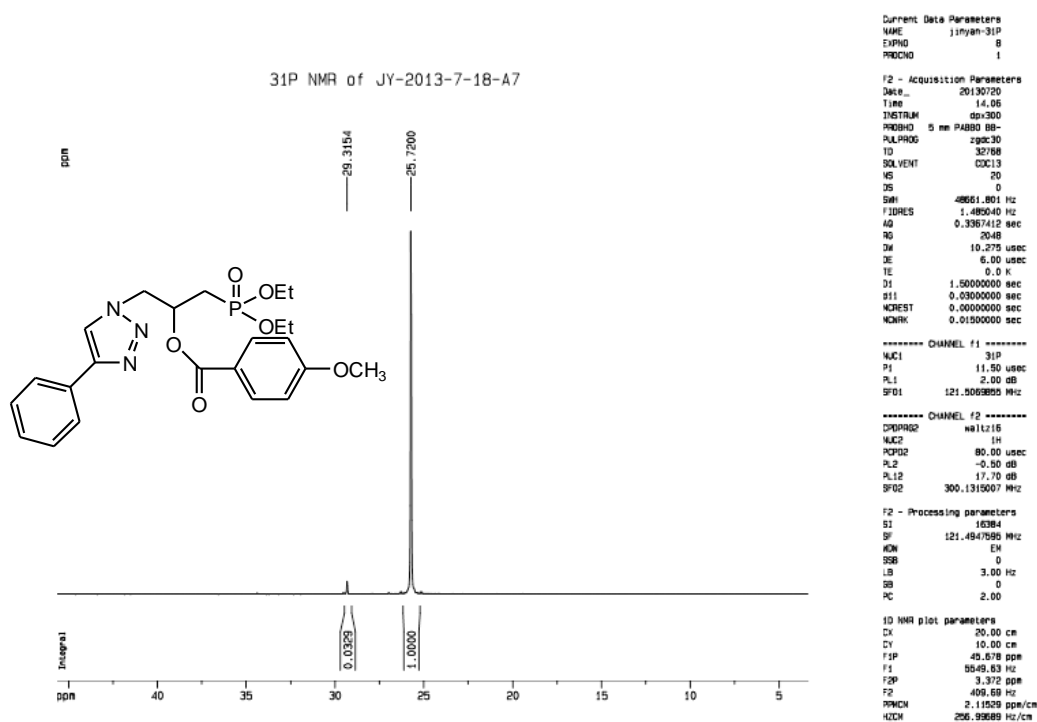

Figure S34. HRMS spectrum of compound 5-A7.

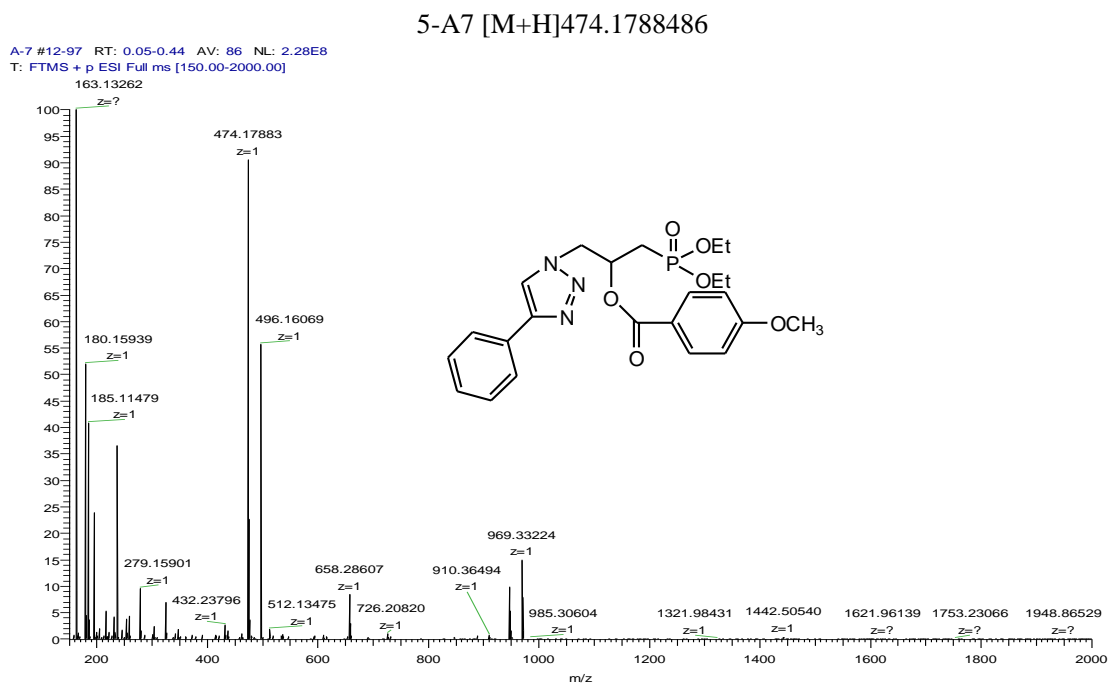

Figure S35. HRMS spectrum of compound 5-A7.

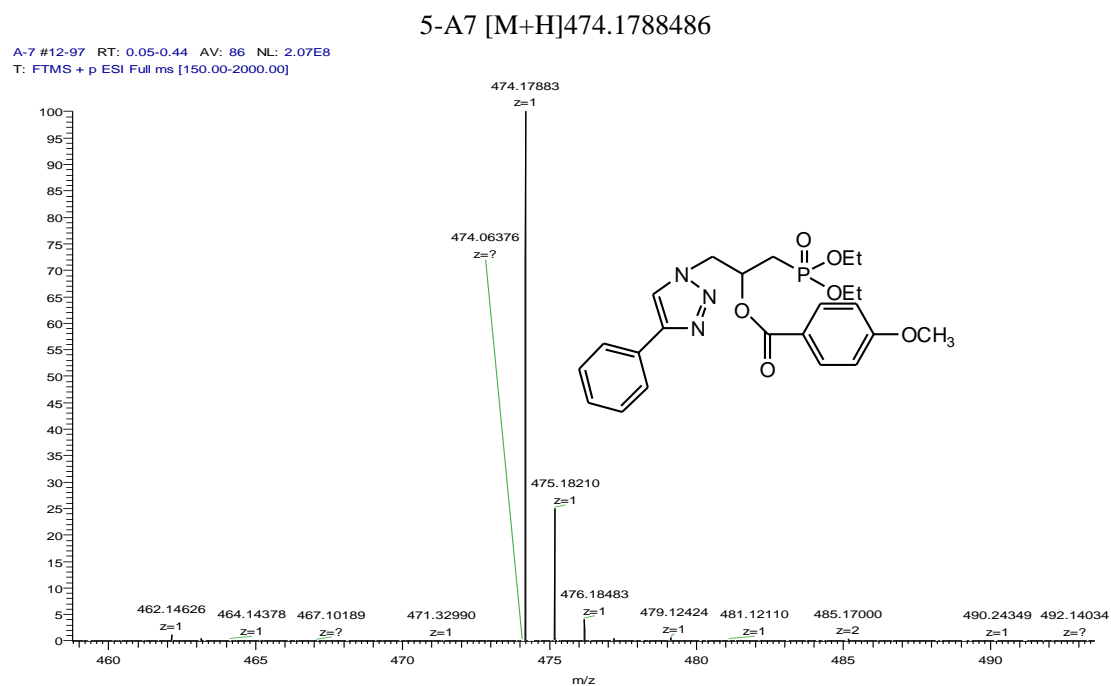Figure S36. <sup>1</sup>H-NMR spectrum of compound 5-A8.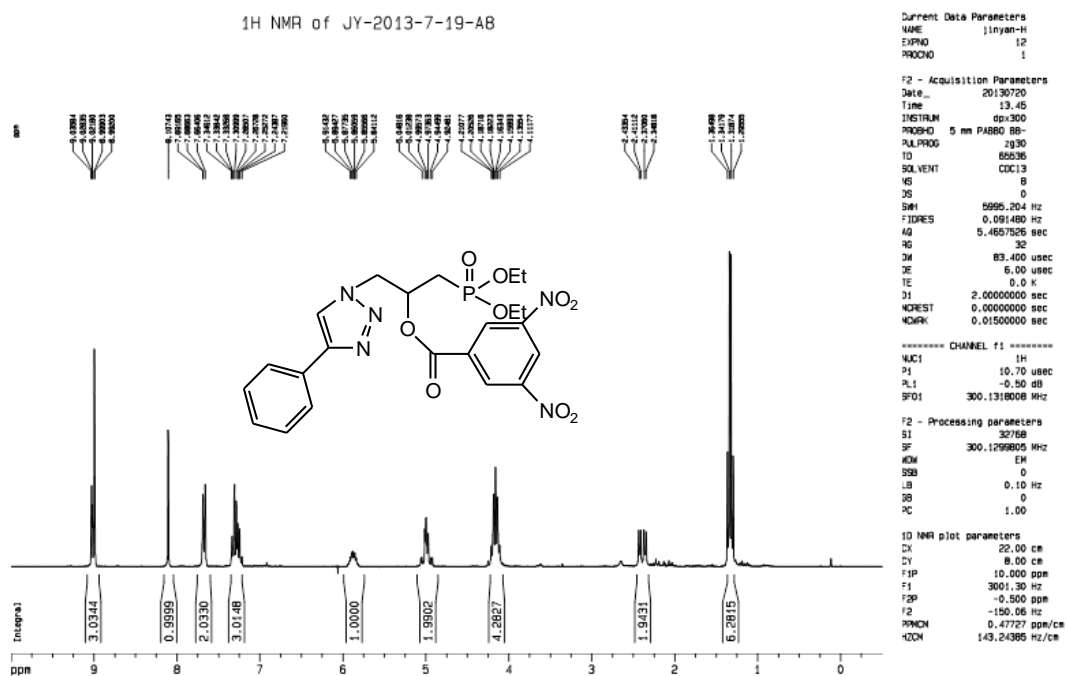

Figure S37.  $^{13}\text{C}$ -NMR spectrum of compound 5-A8.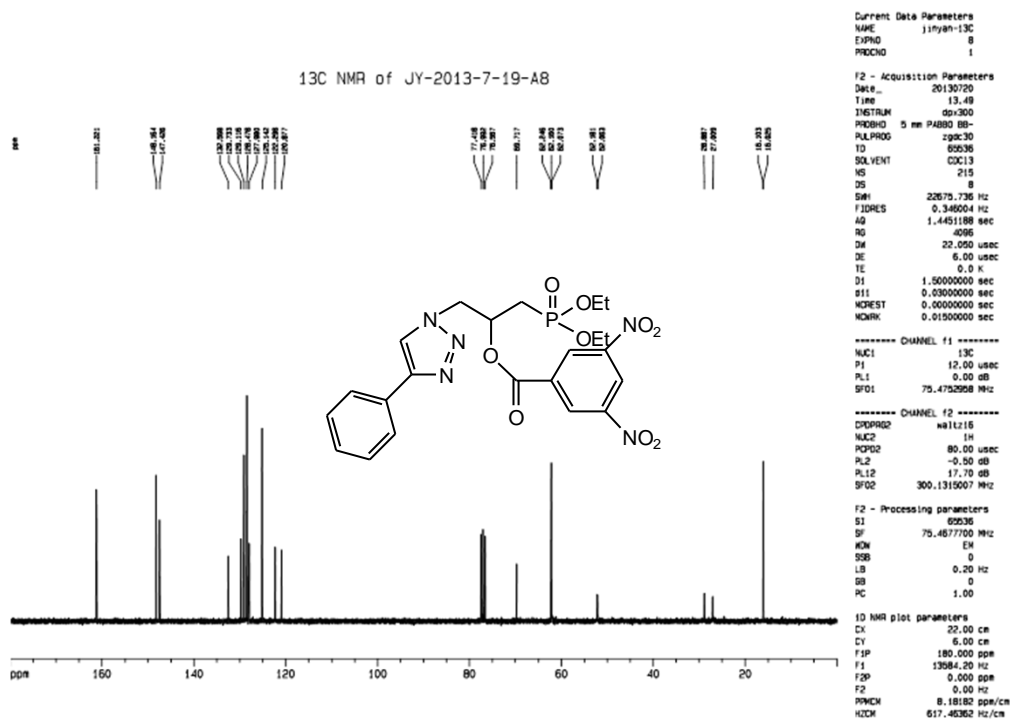Figure S38.  $^{31}\text{P}$ -NMR spectrum of compound 5-A8.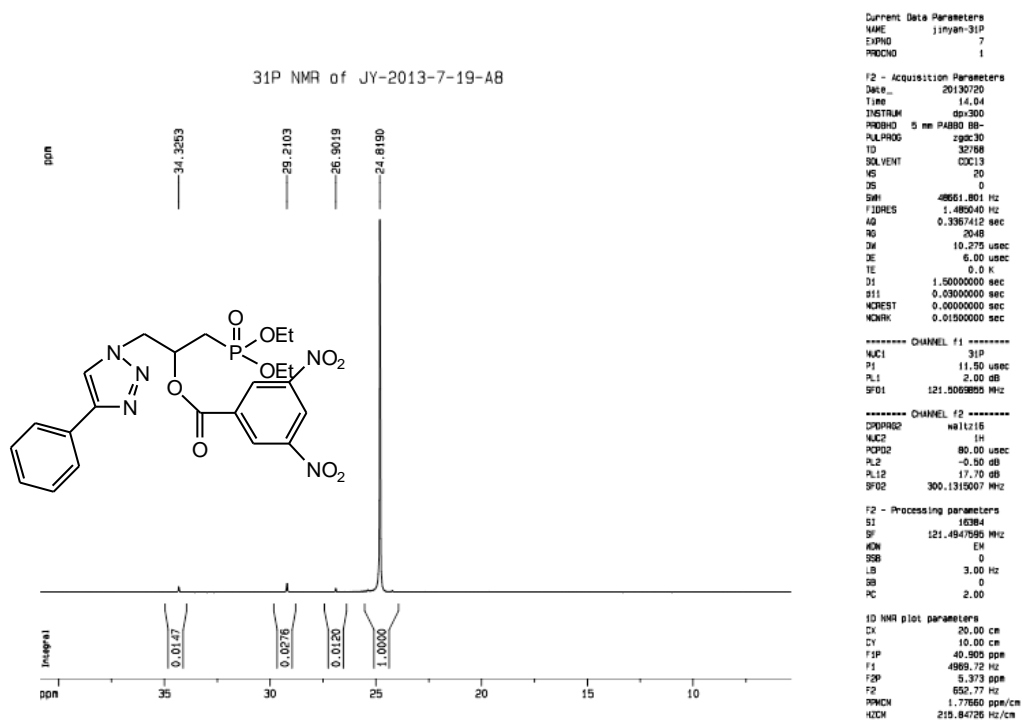

Figure S39. HRMS spectrum of compound 5-A8

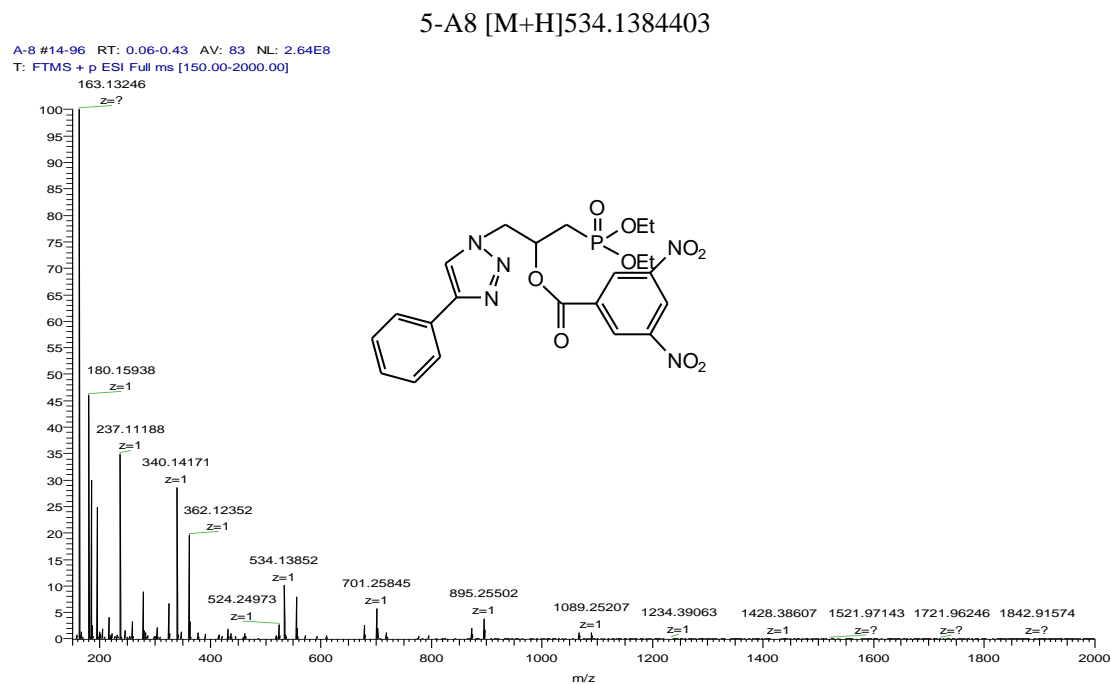

Figure S40. HRMS spectrum of compound 5-A8

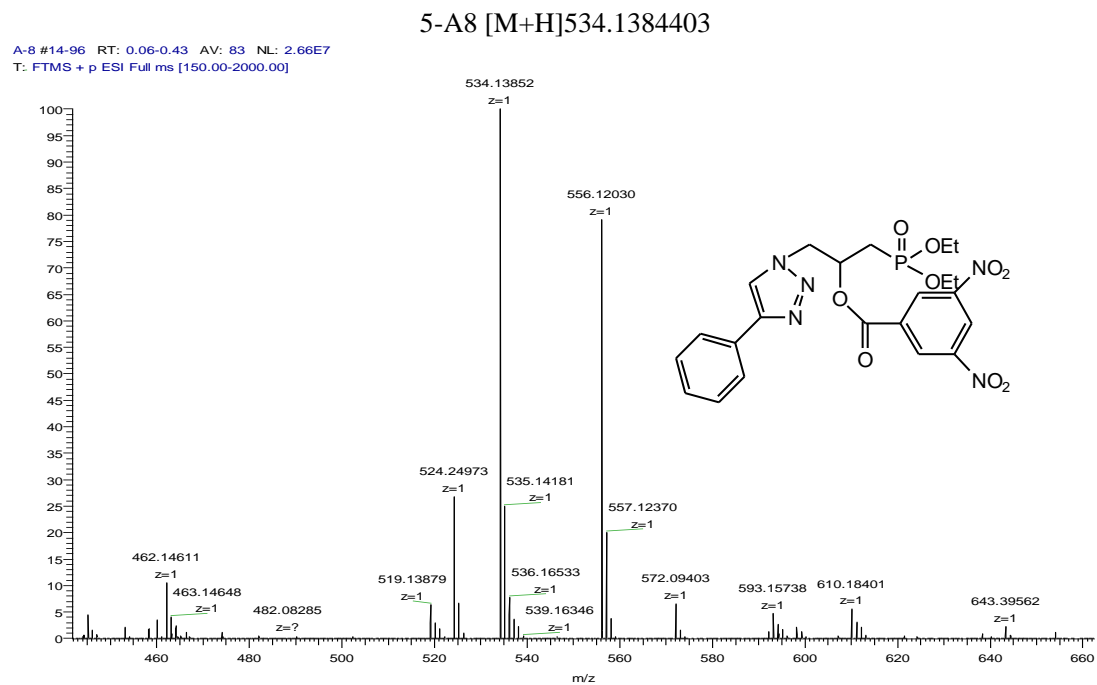

Figure S41. <sup>1</sup>H-NMR spectrum of compound 5-B1.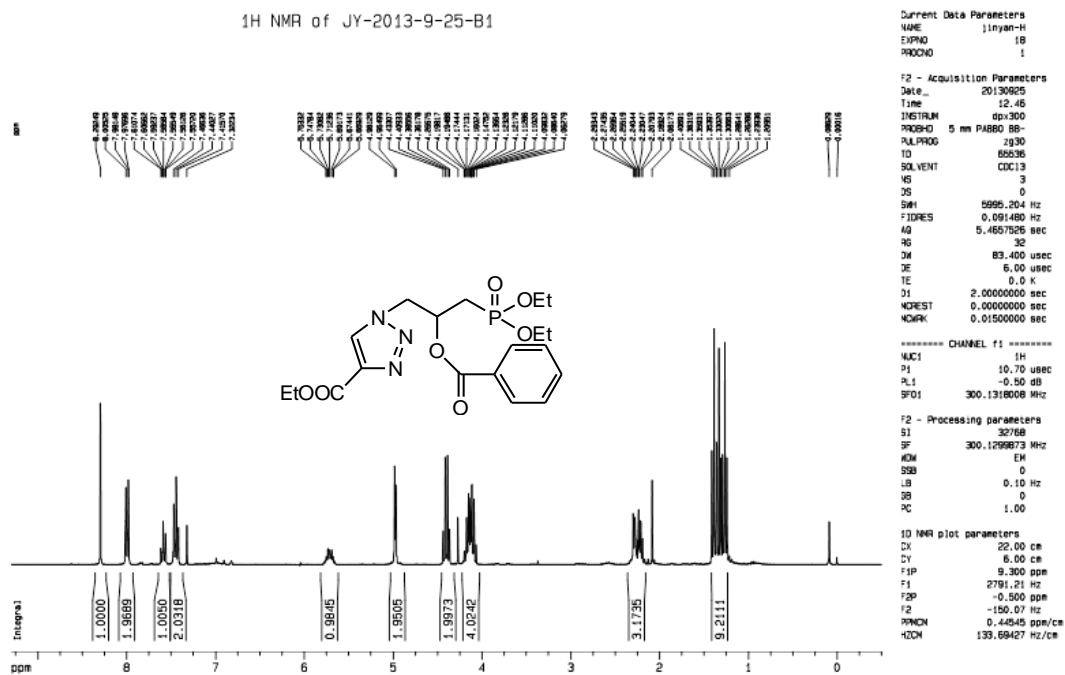Figure S42. <sup>13</sup>C-NMR spectrum of compound 5-B1.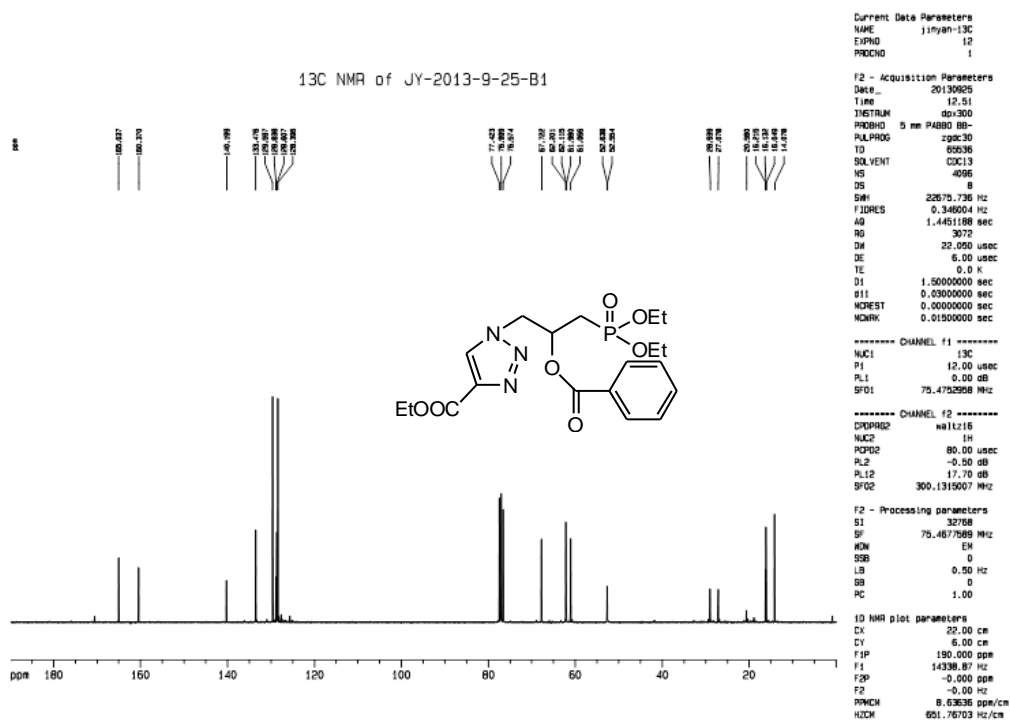

Figure S43.  $^{31}\text{P}$ -NMR spectrum of compound 5-B1.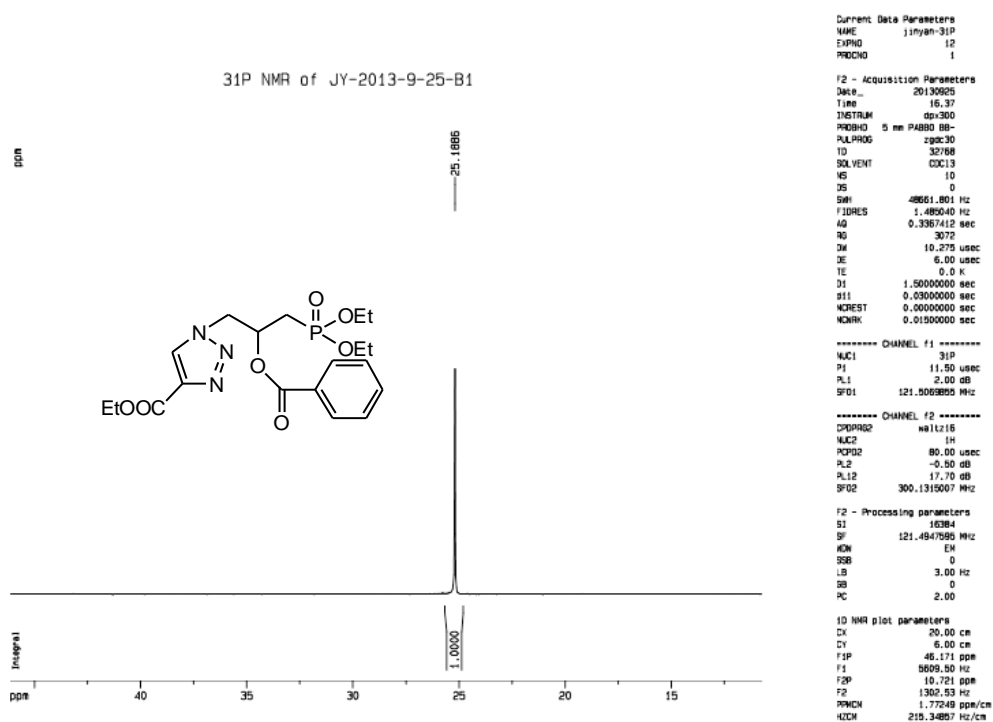

Figure S44. HRMS spectrum of compound 5-B1.

5-B1 [M+H]<sup>+</sup>440.1581131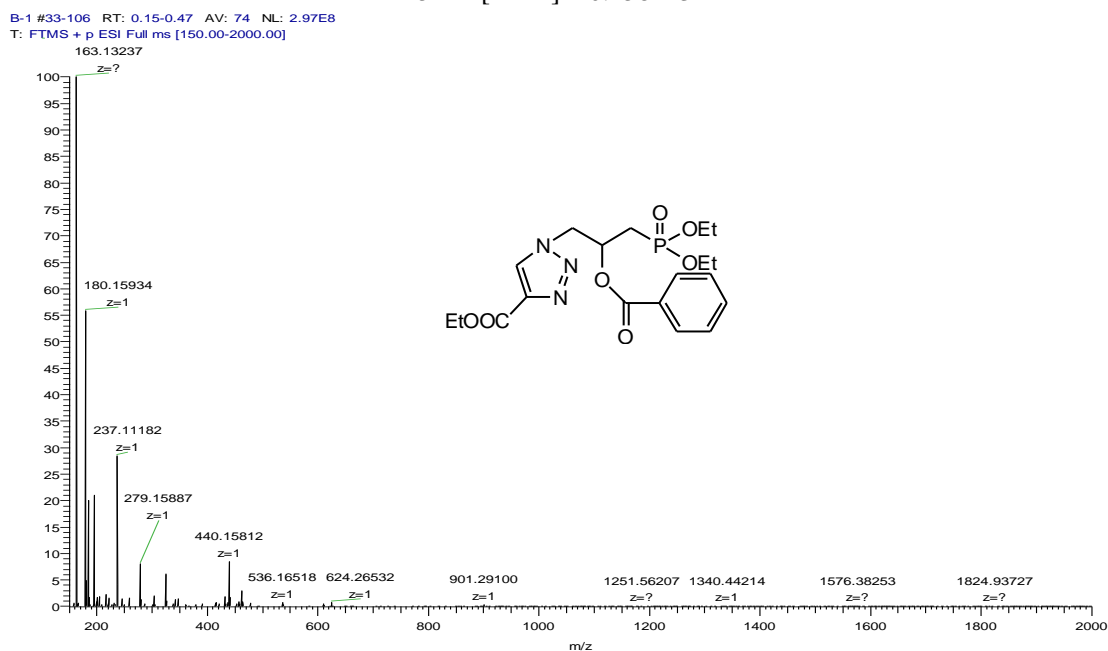

Figure S45. HRMS spectrum of compound 5-B1.

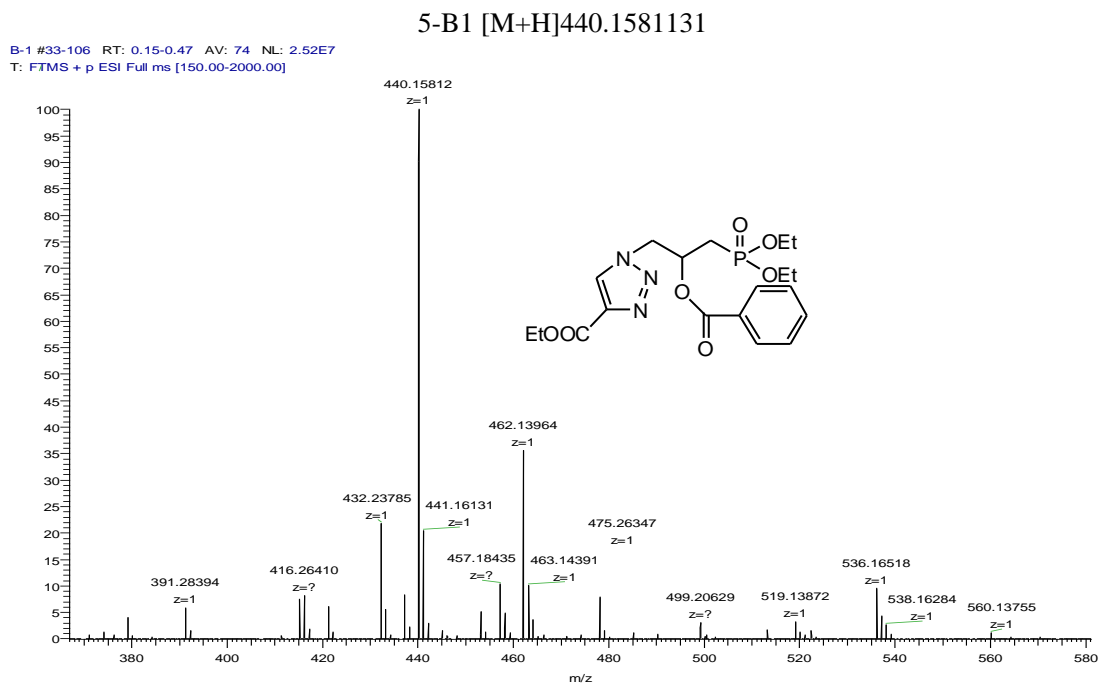Figure S46. <sup>1</sup>H-NMR spectrum of compound 5-B2.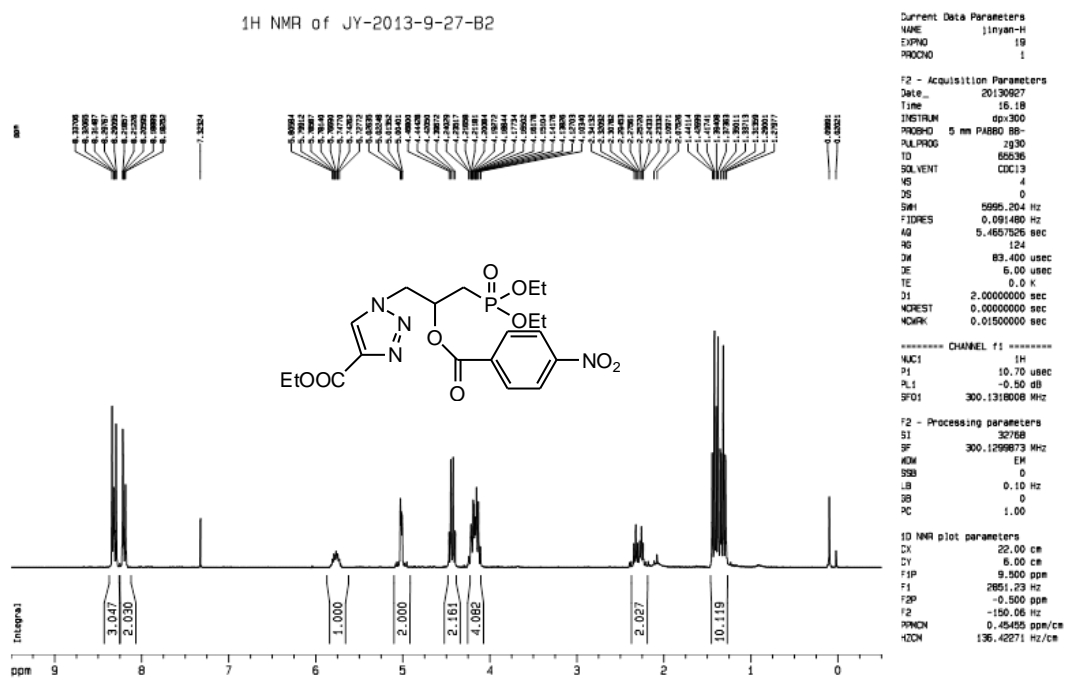

Figure S47.  $^{13}\text{C}$ -NMR spectrum of compound 5-B2.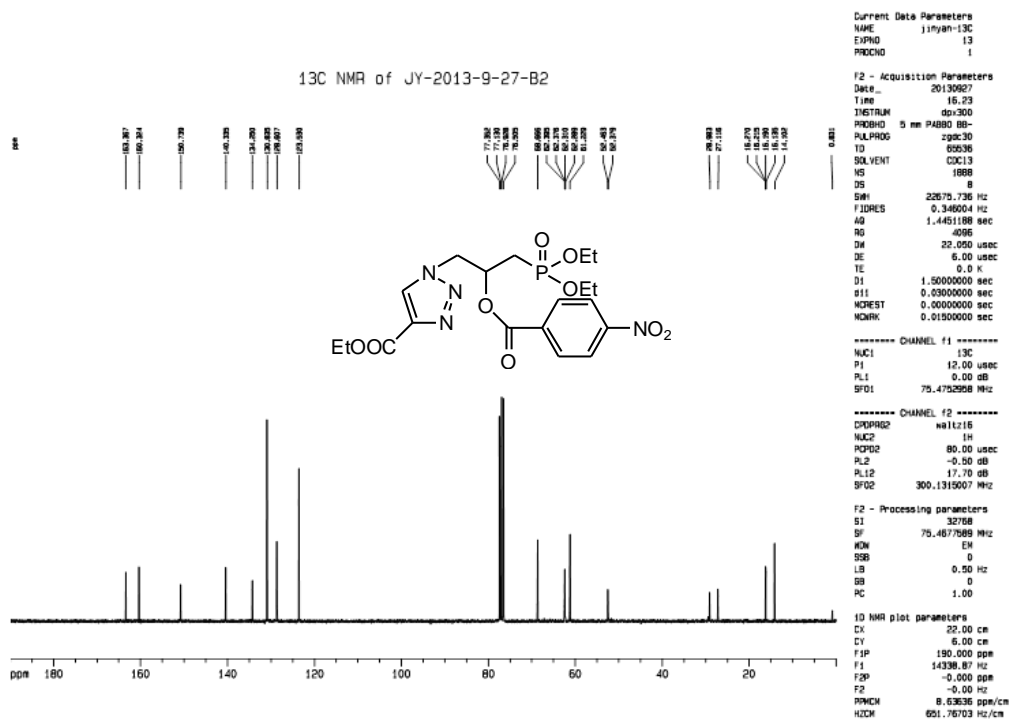Figure S48.  $^{31}\text{P}$ -NMR spectrum of compound 5-B2.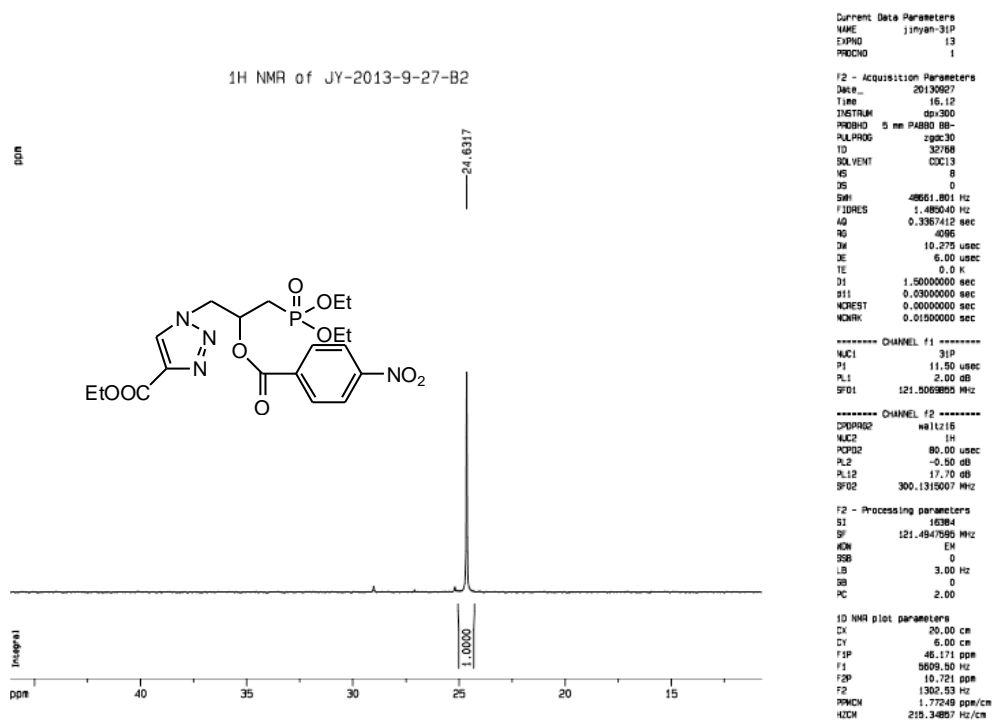



Figure S49. HRMS spectrum of compound 5-B2.

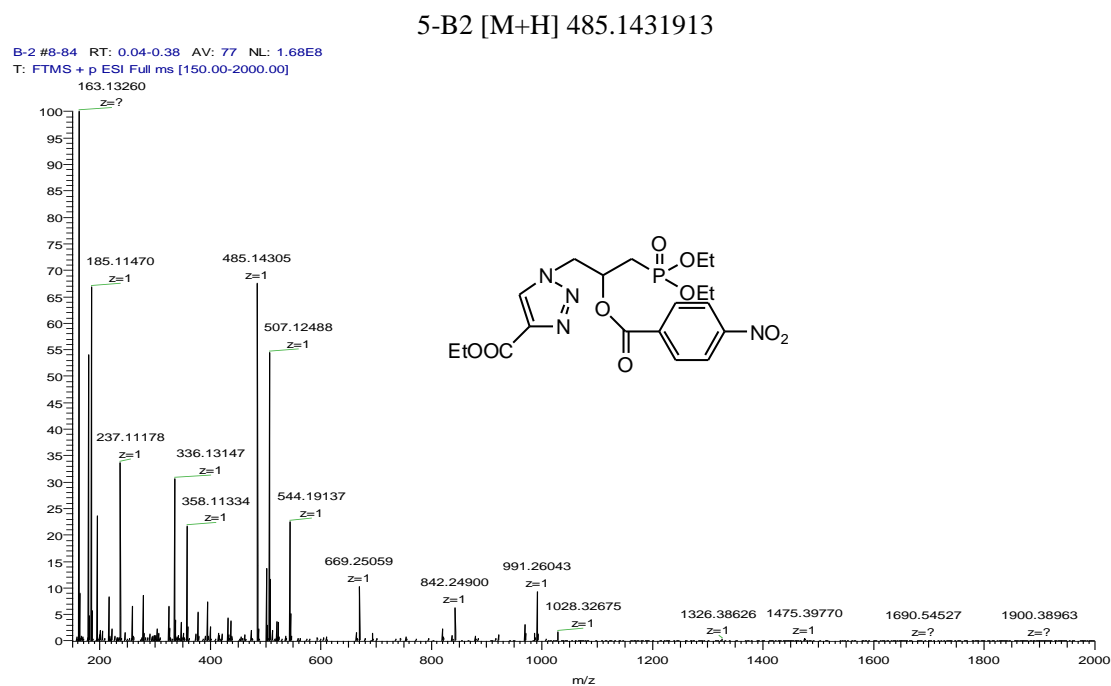

Figure S50. HRMS spectrum of compound 5-B2.

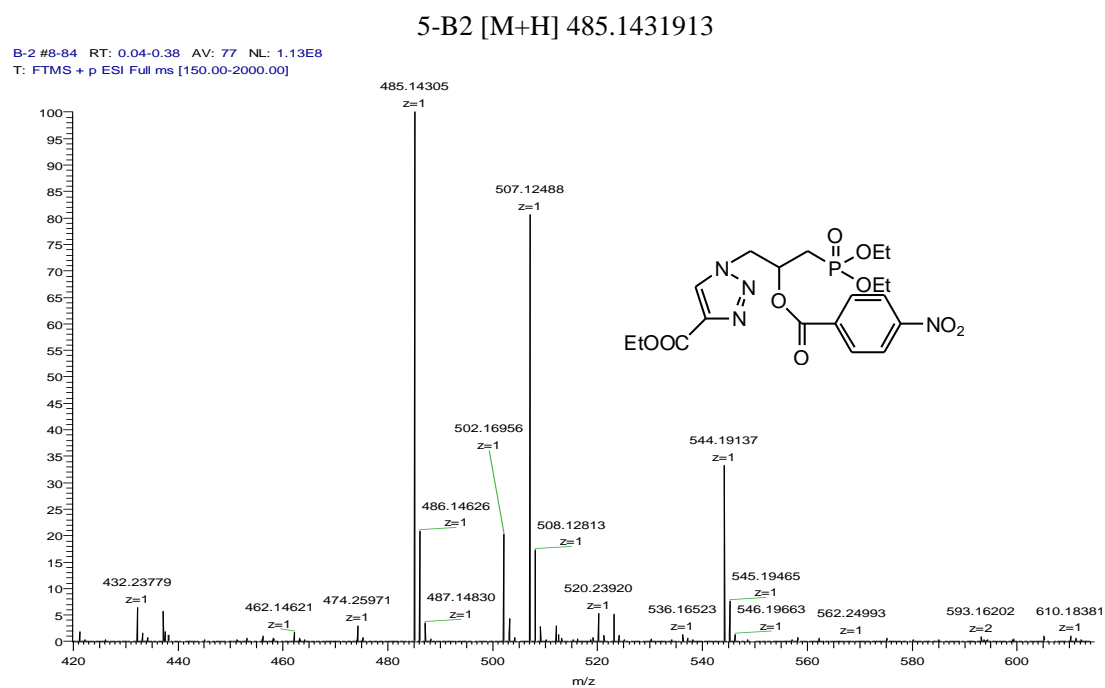

Figure S51. <sup>1</sup>H-NMR spectrum of compound 5-B3.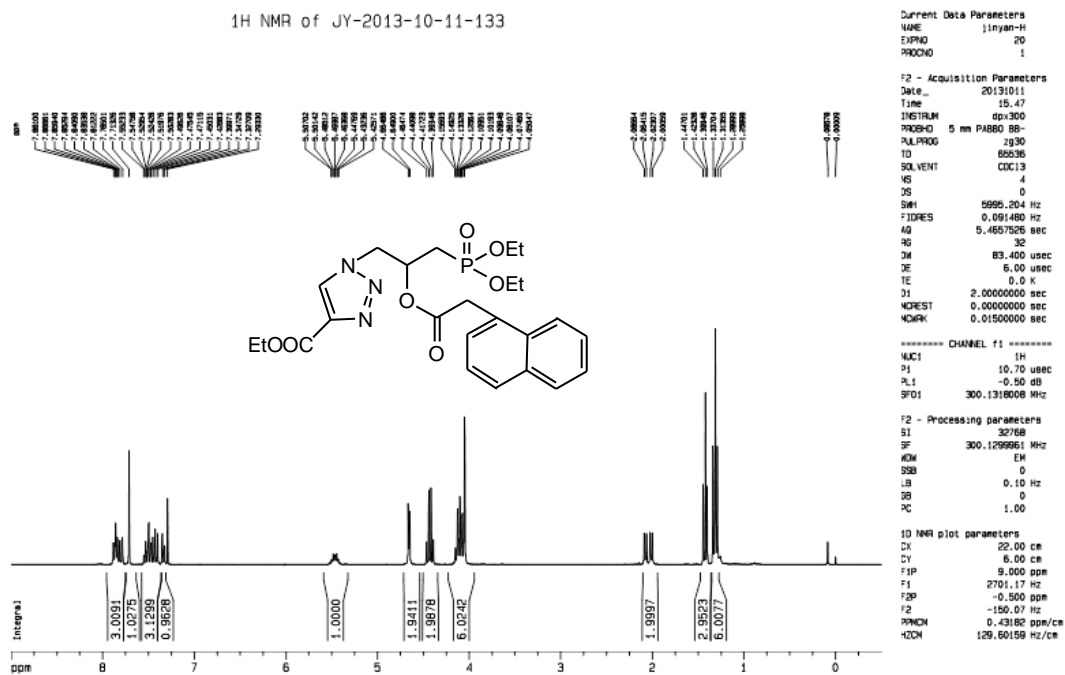Figure S52. <sup>13</sup>C-NMR spectrum of compound 5-B3.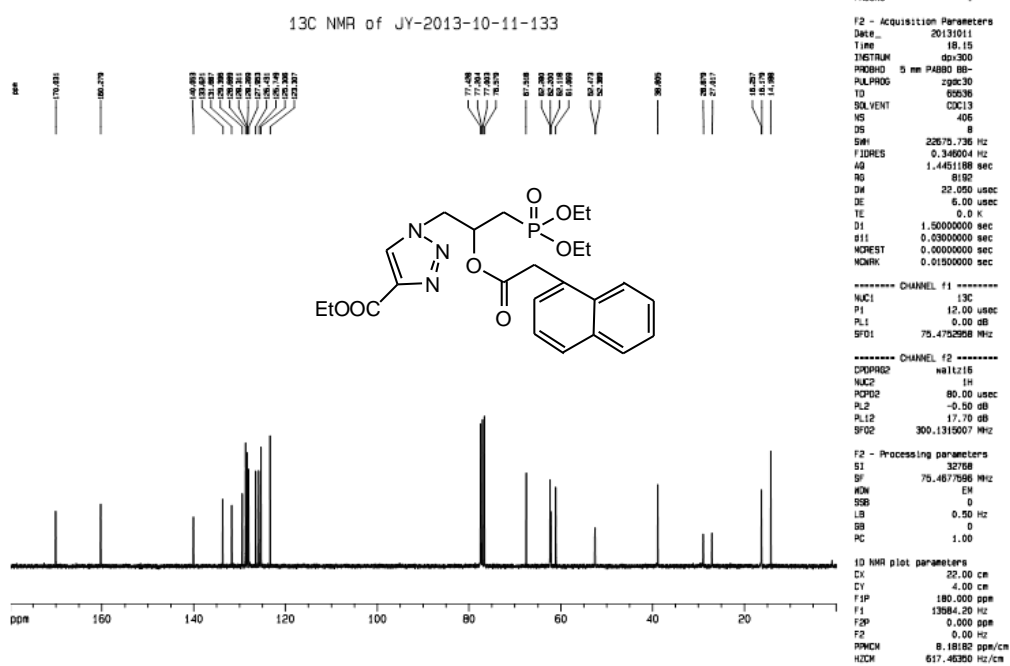

Figure S53. <sup>31</sup>P-NMR spectrum of compound 5-B3.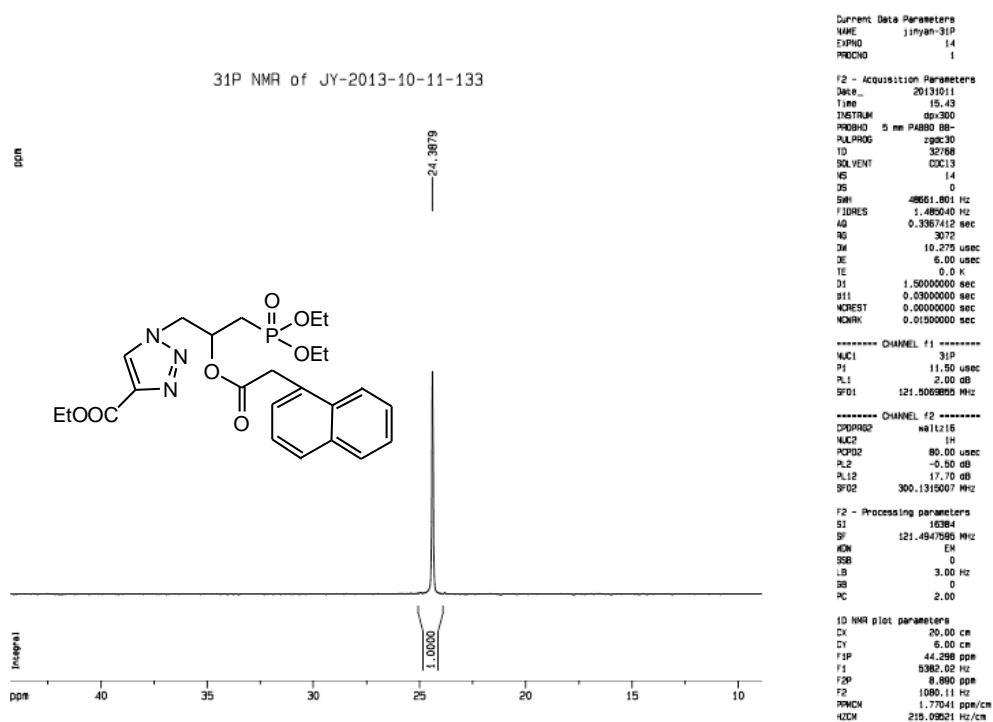

Figure S54. HRMS spectrum of compound 5-B3.

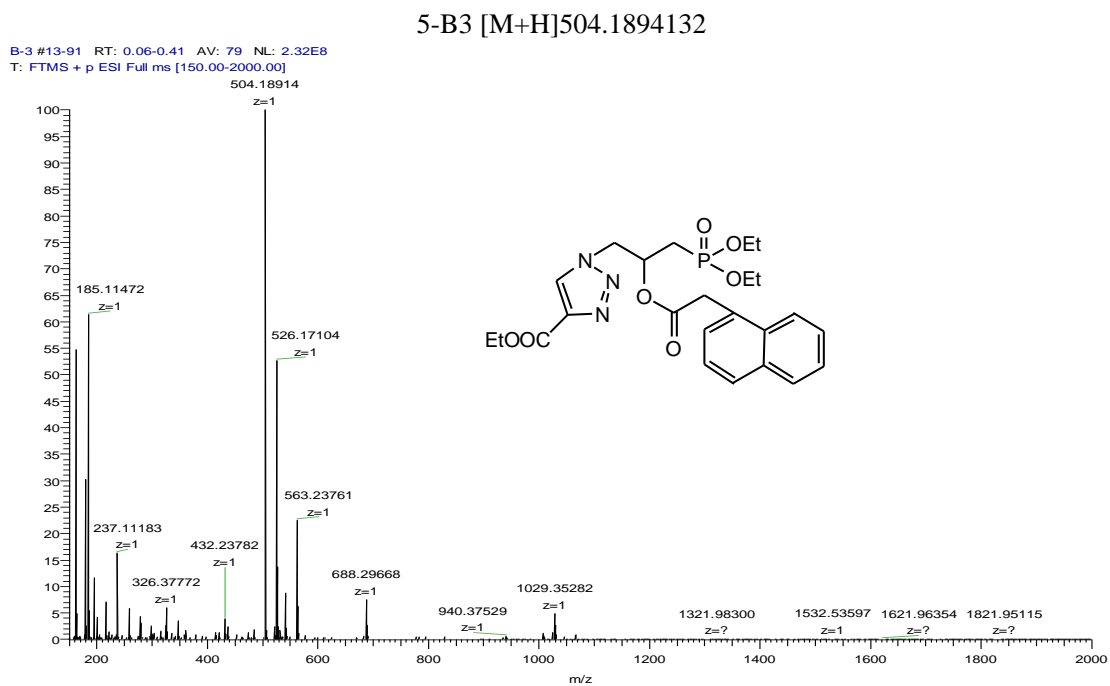

Figure S55. HRMS spectrum of compound 5-B3.

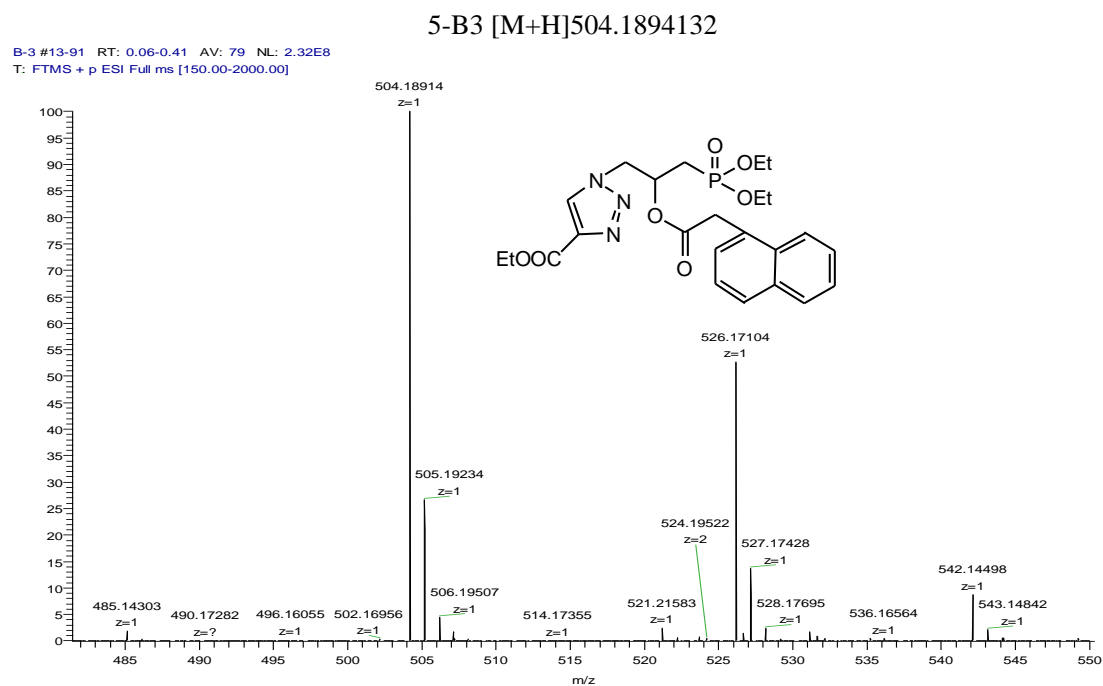Figure S56. <sup>1</sup>H-NMR spectrum of compound 5-B4.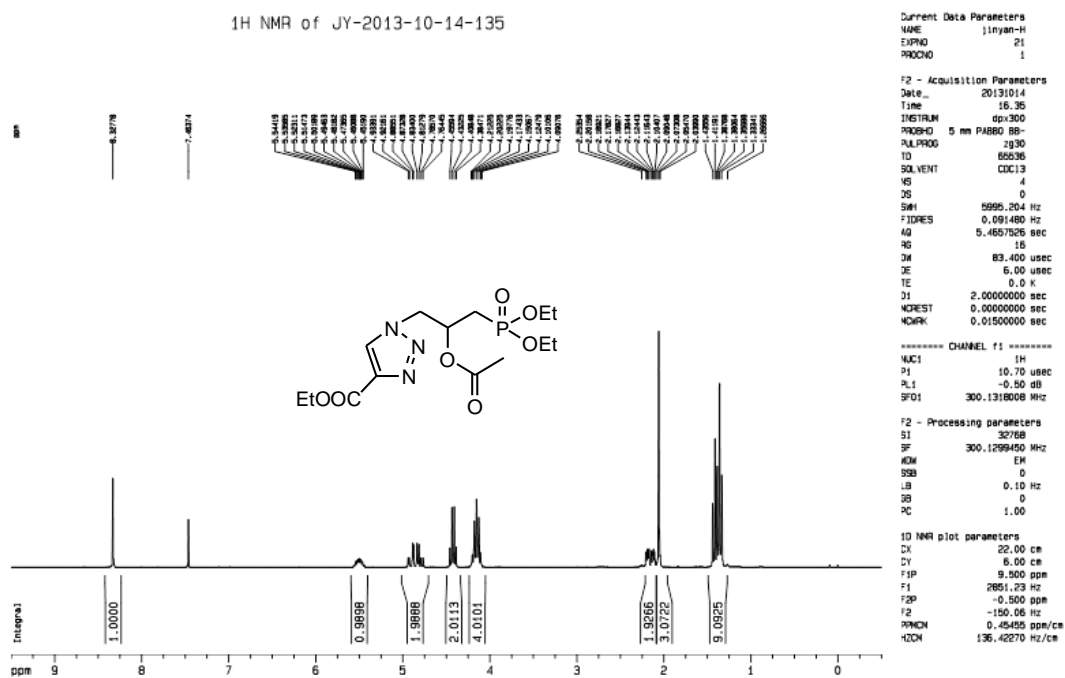

Figure S57.  $^{13}\text{C}$ -NMR spectrum of compound 5-B4.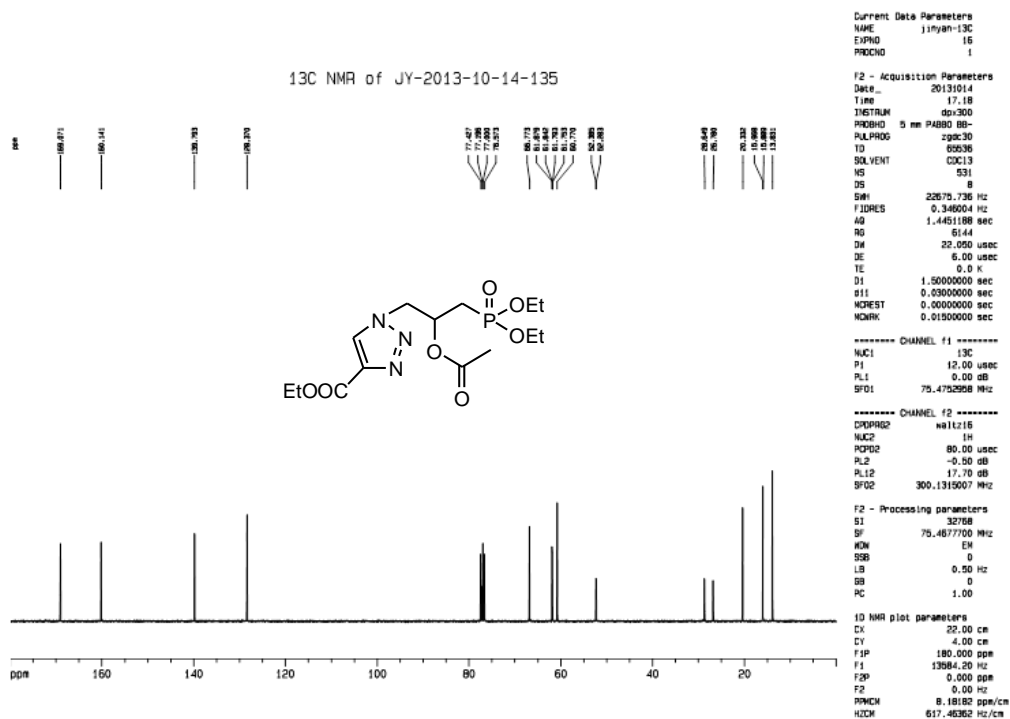Figure S58.  $^{31}\text{P}$ -NMR spectrum of compound 5-B4.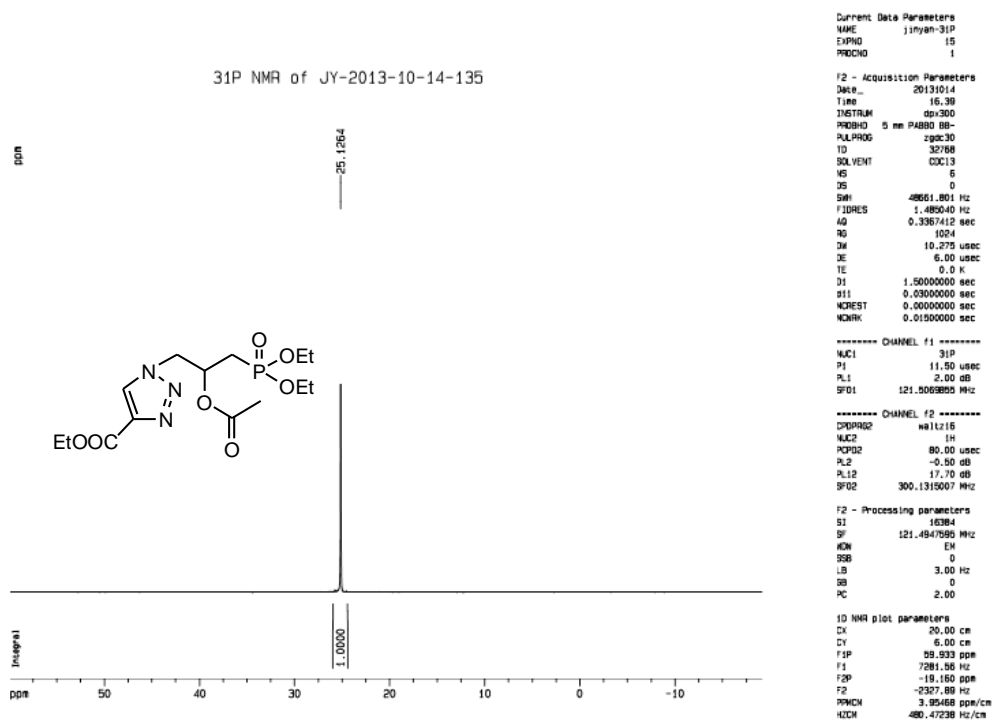

Figure S59. HRMS spectrum of compound 5-B4

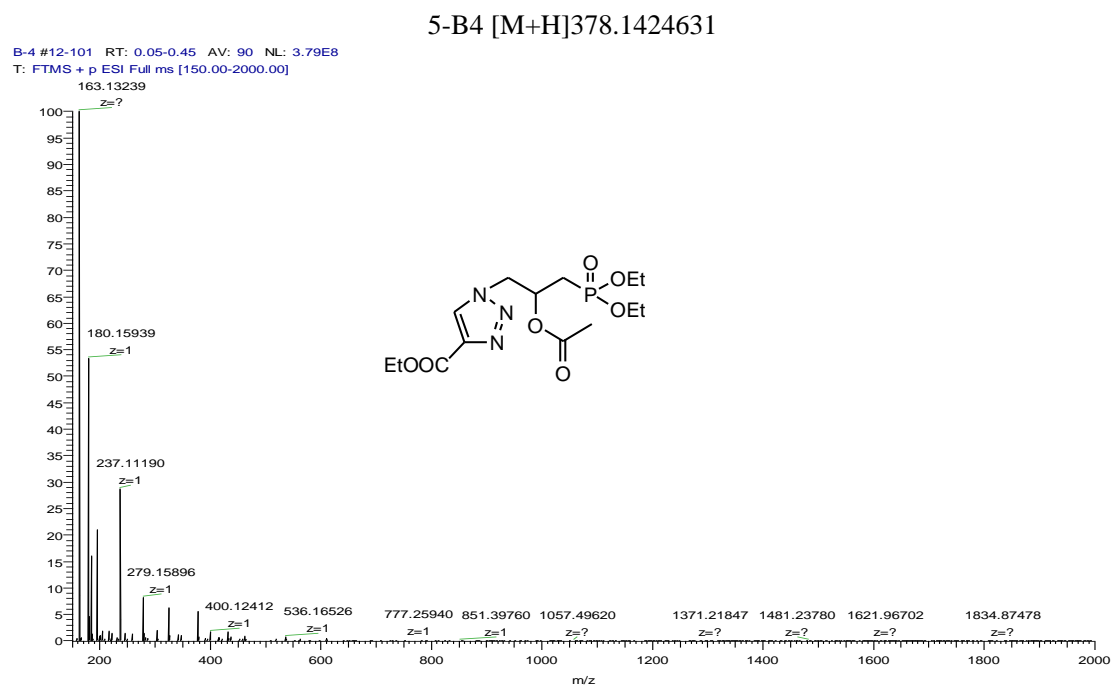

Figure S60. HRMS spectrum of compound 5-B4.

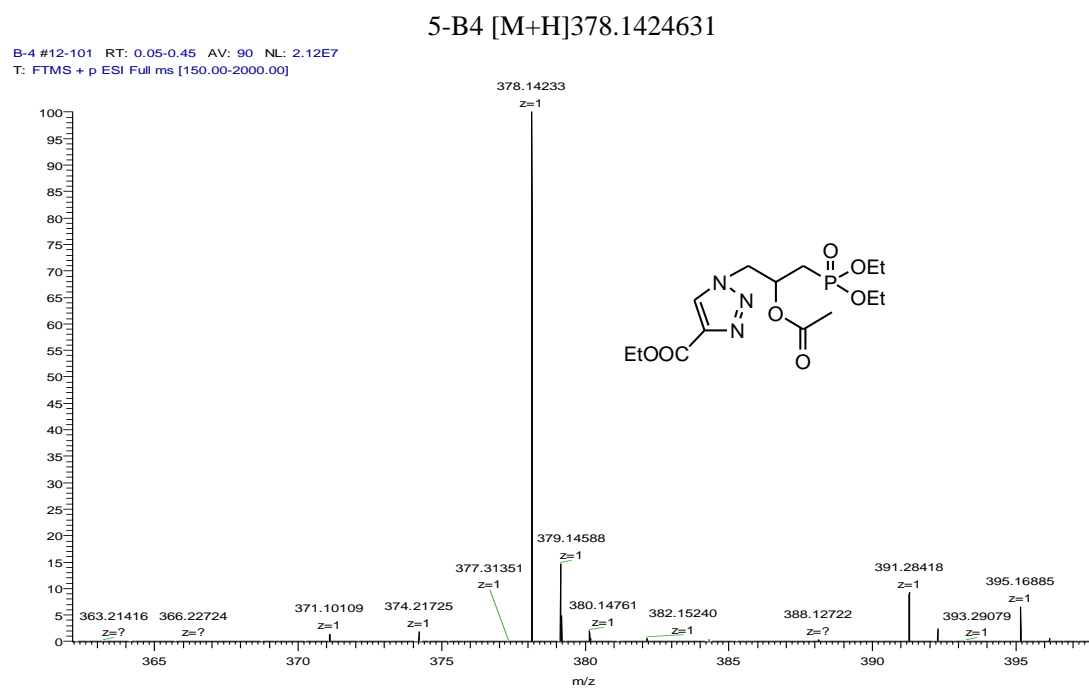

Figure S61. <sup>1</sup>H-NMR spectrum of compound 5-B5.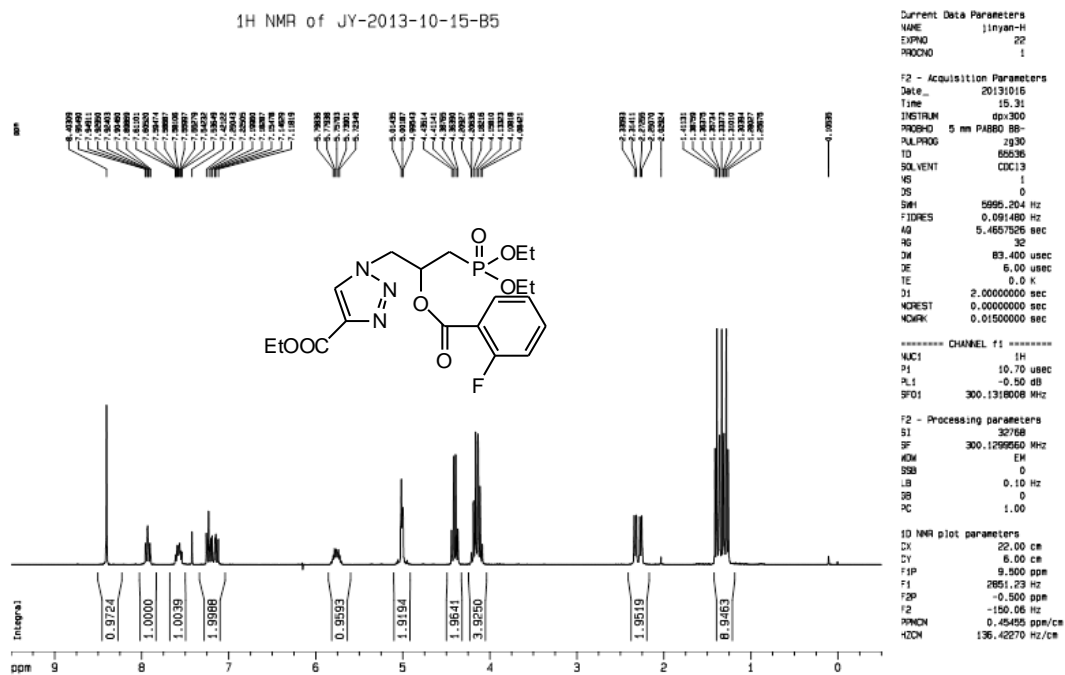Figure S62. <sup>13</sup>C-NMR spectrum of compound 5-B5.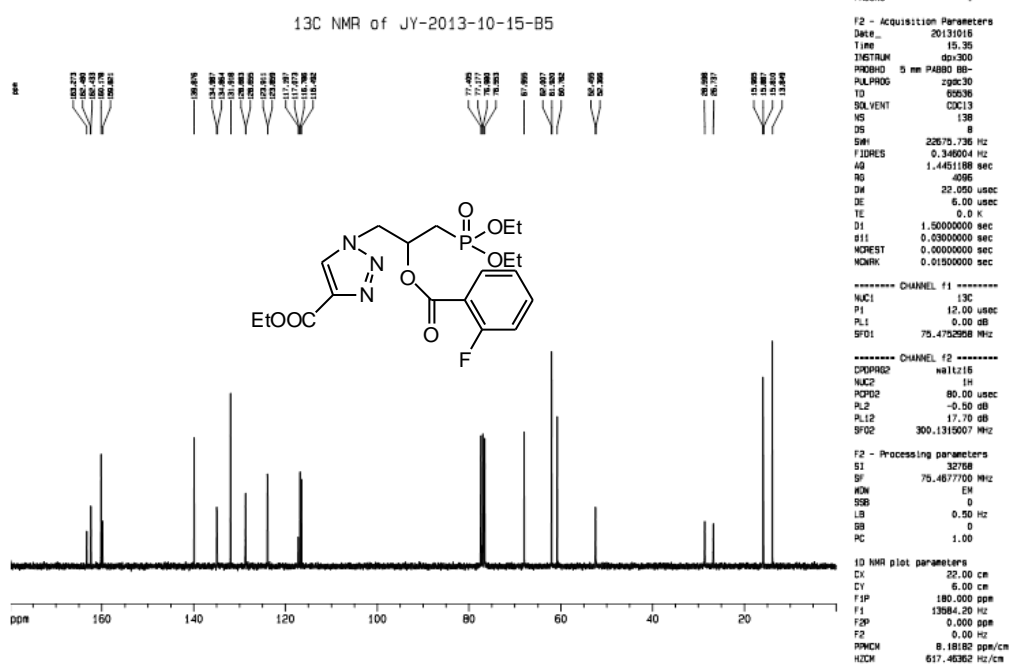

Figure S63.  $^{31}\text{P}$ -NMR spectrum of compound 5-B5.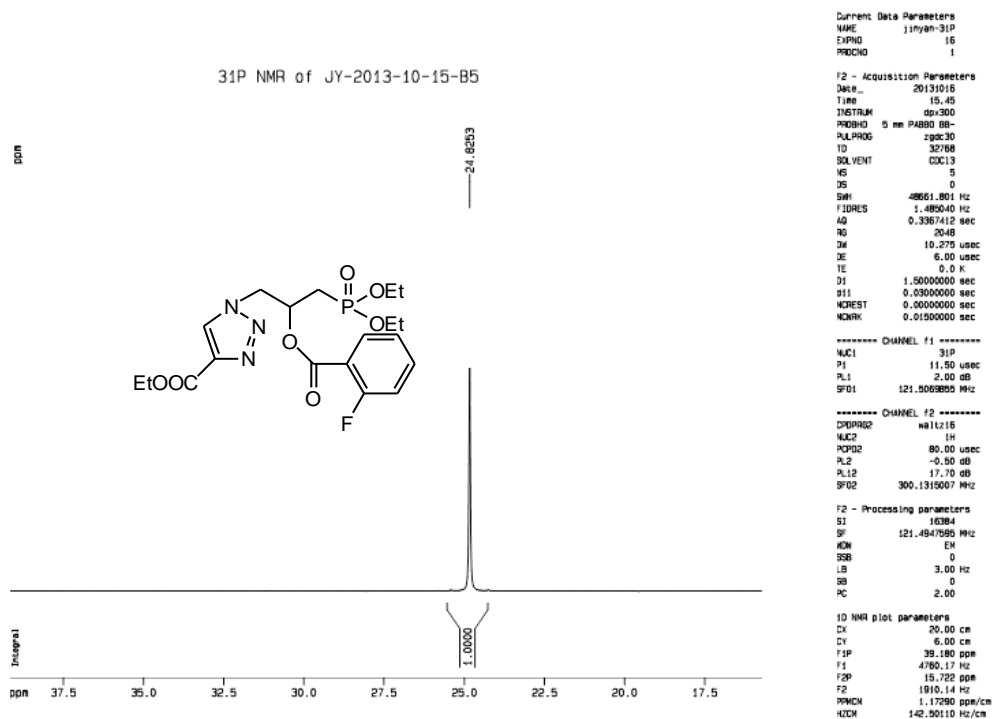

Figure S64. HRMS spectrum of compound 5-B5.

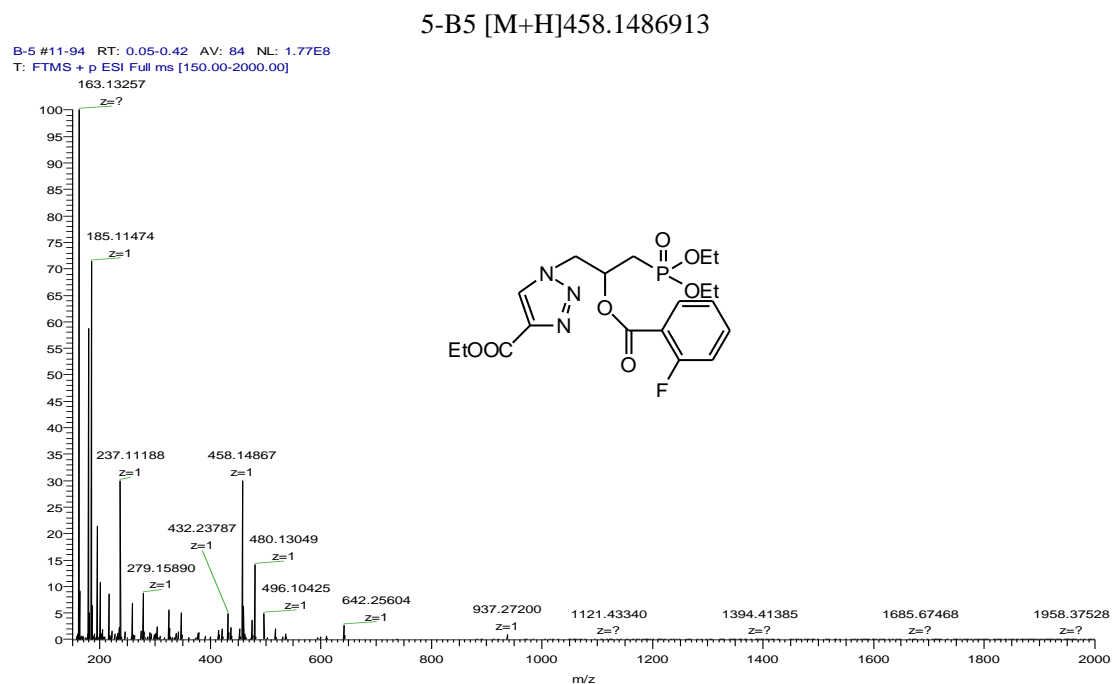



Figure S65. HRMS spectrum of compound 5-B5.

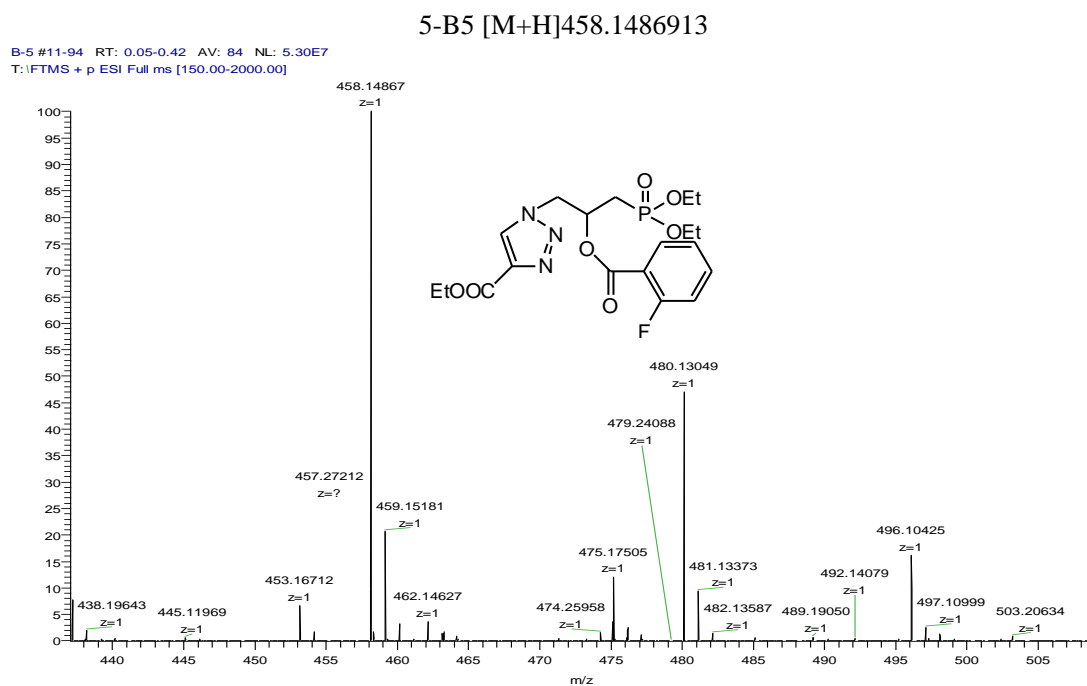Figure S66. <sup>1</sup>H-NMR spectrum of compound 5-B6.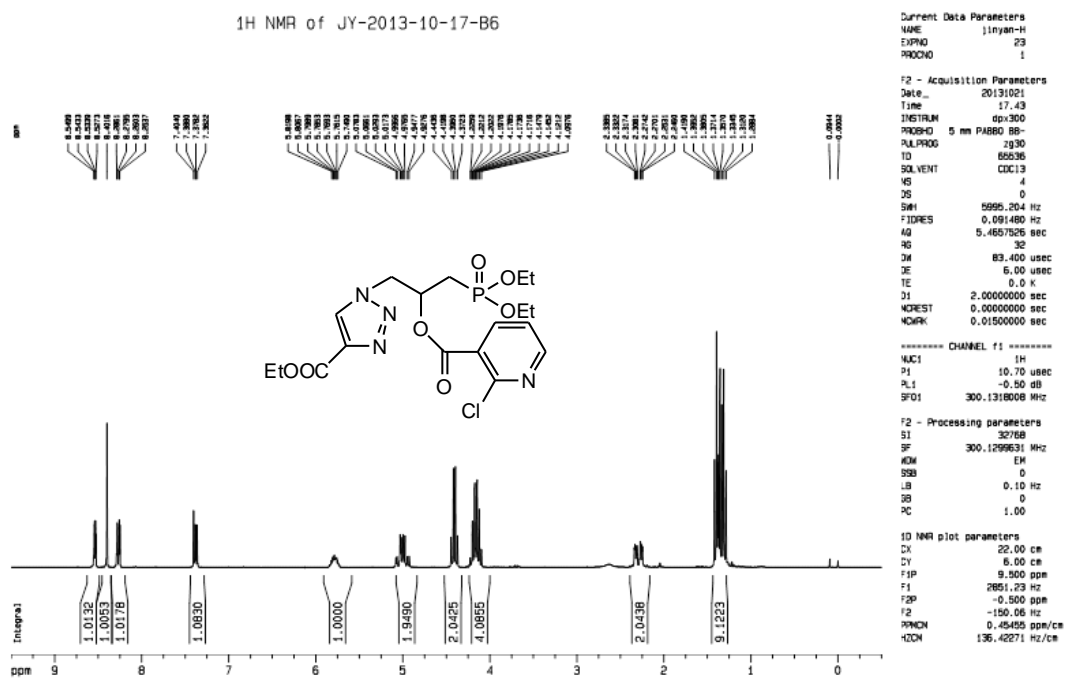

Figure S67.  $^{13}\text{C}$ -NMR spectrum of compound 5-B6.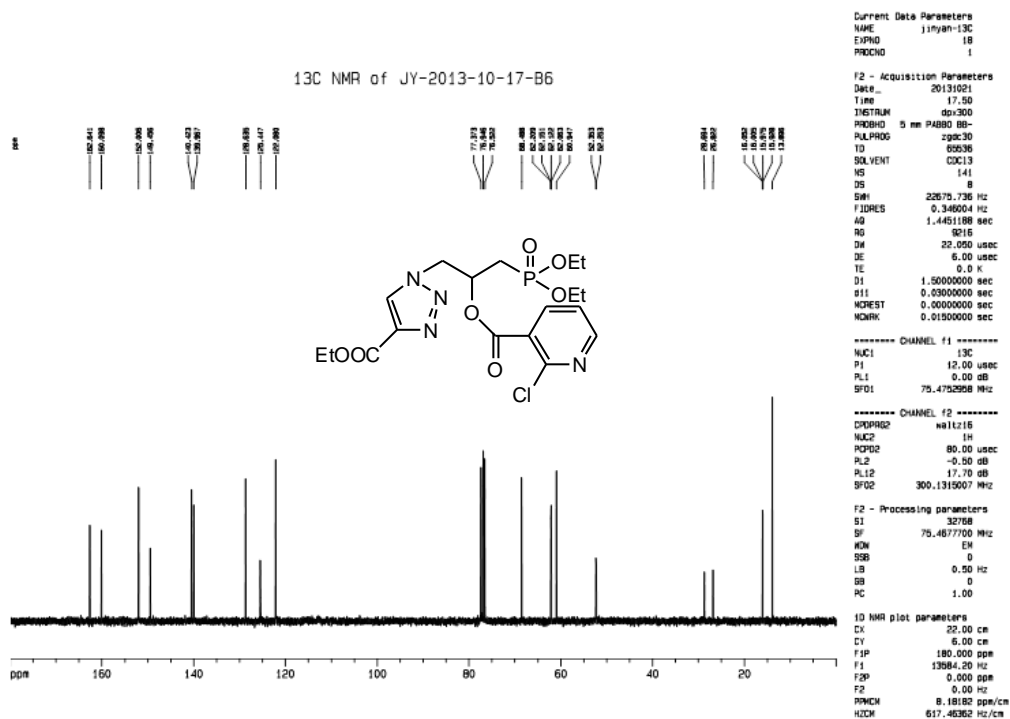Figure S68.  $^{31}\text{P}$ -NMR spectrum of compound 5-B6.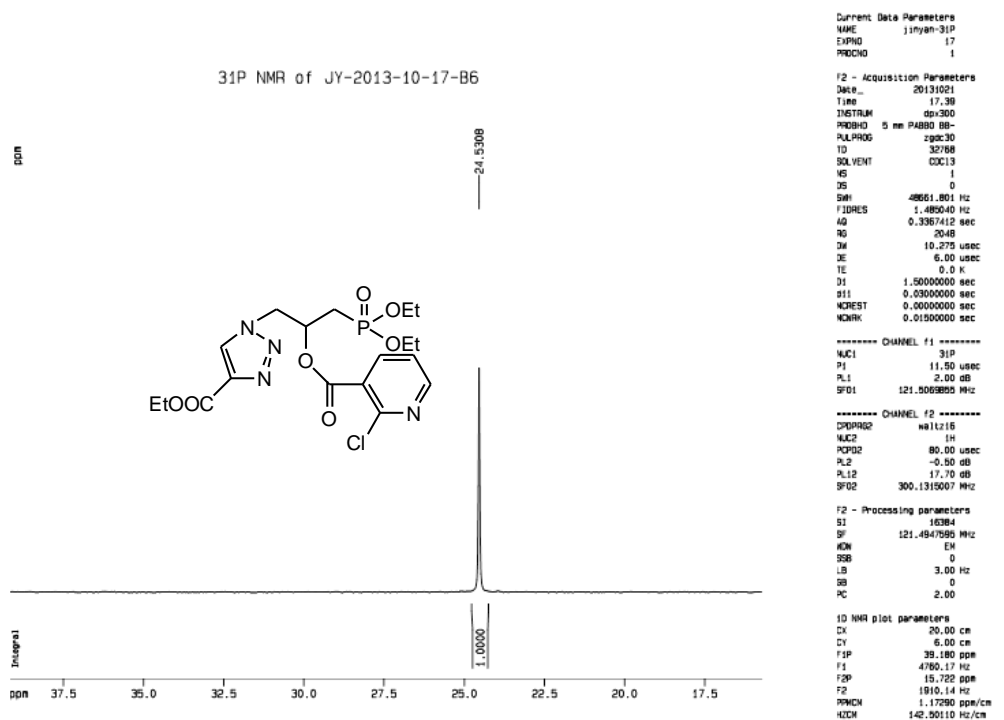

Figure S69. HRMS spectrum of compound 5-B6.

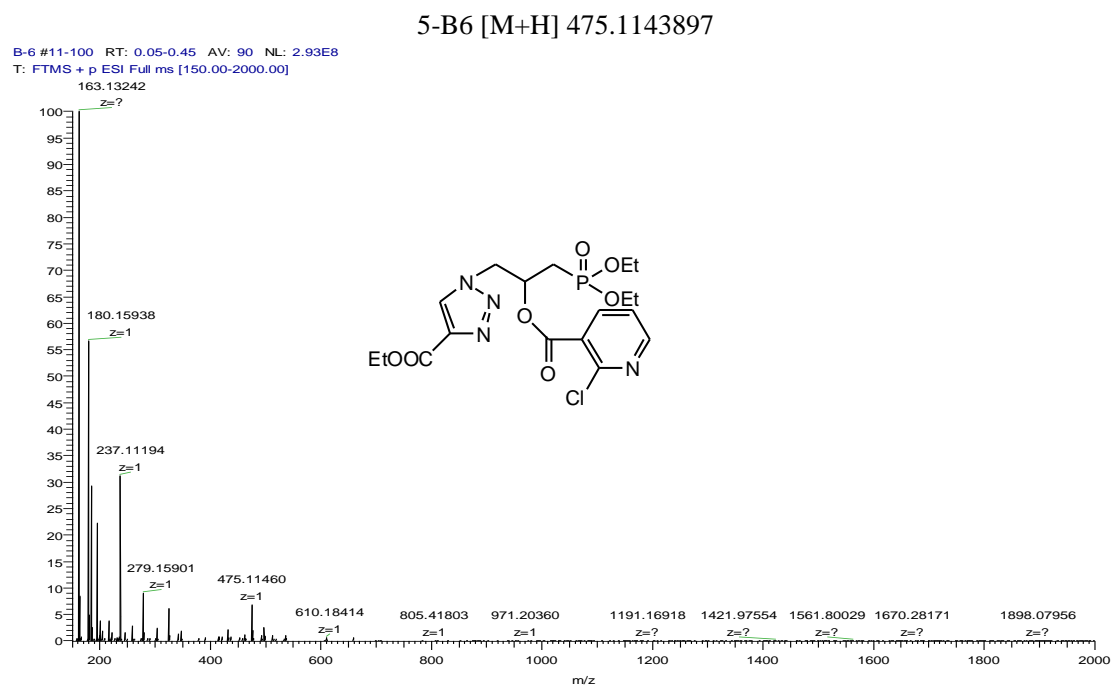

Figure S70. HRMS spectrum of compound 5-B6.

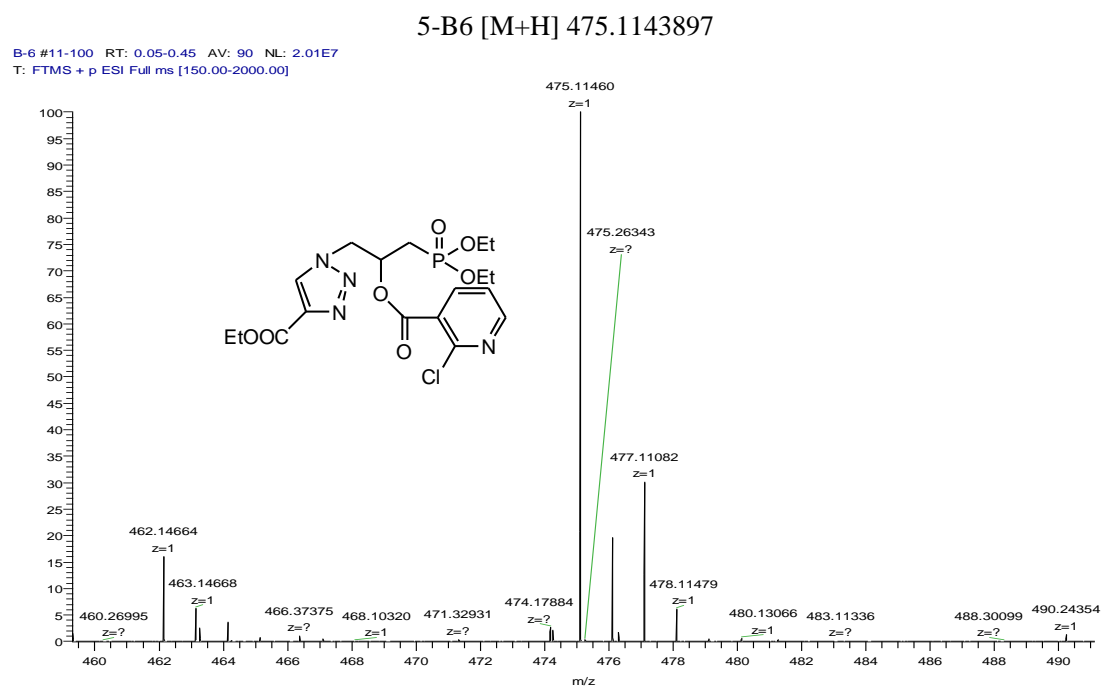

Figure S71. <sup>1</sup>H-NMR spectrum of compound 5-B7.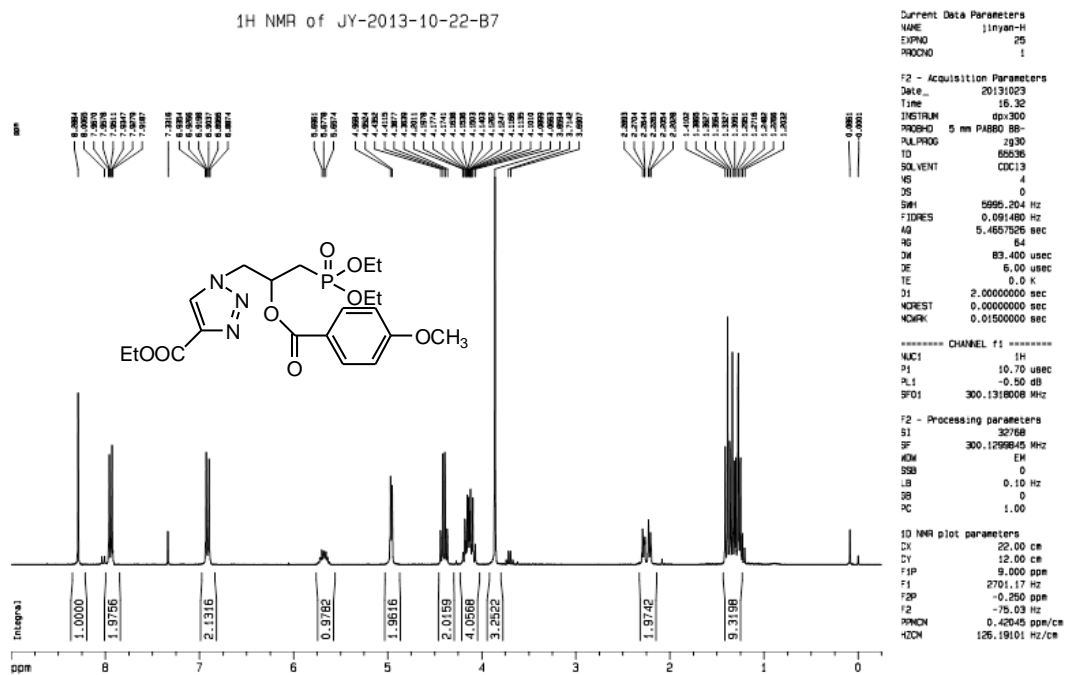Figure S72. <sup>13</sup>C-NMR spectrum of compound 5-B7.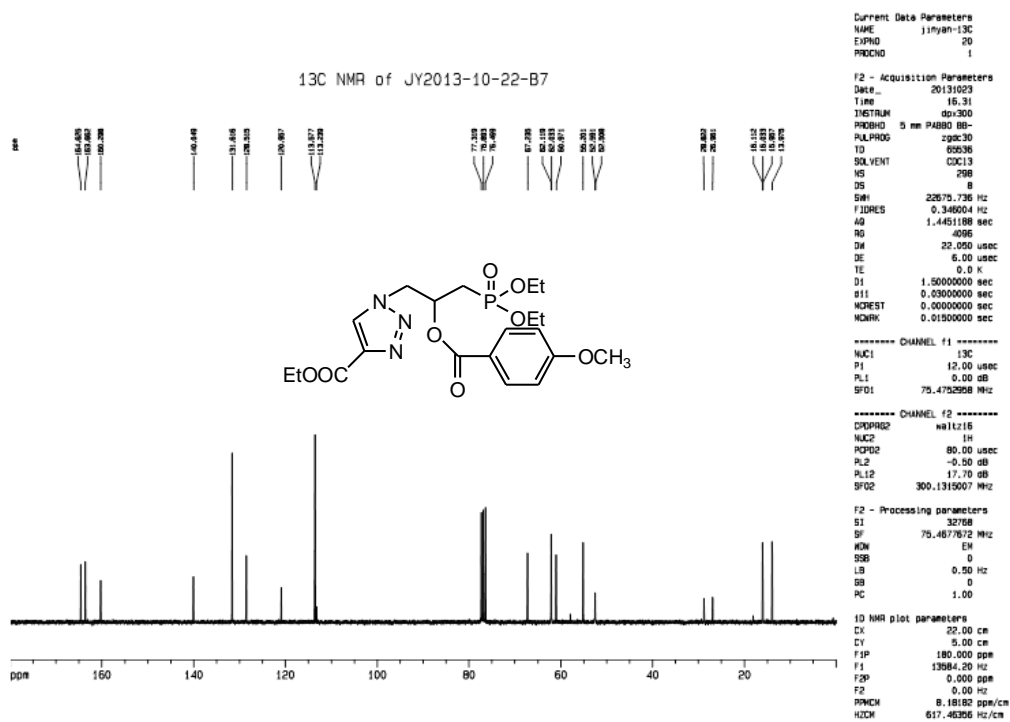

Figure S73.  $^{31}\text{P}$ -NMR spectrum of compound 5-B7.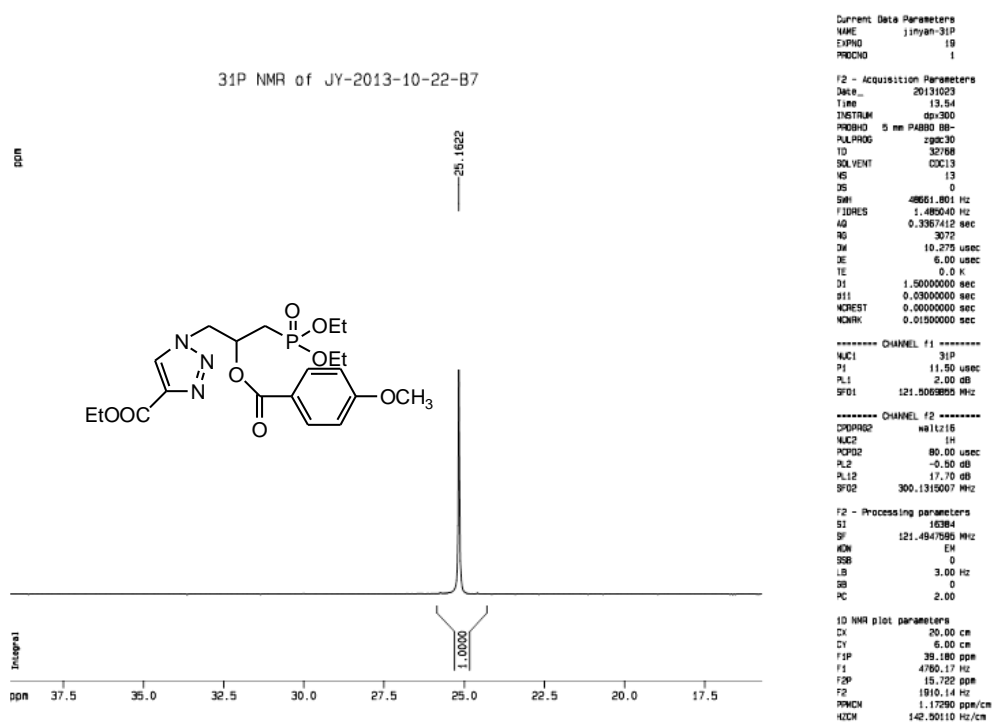

Figure S74. HRMS spectrum of compound 5-B7.

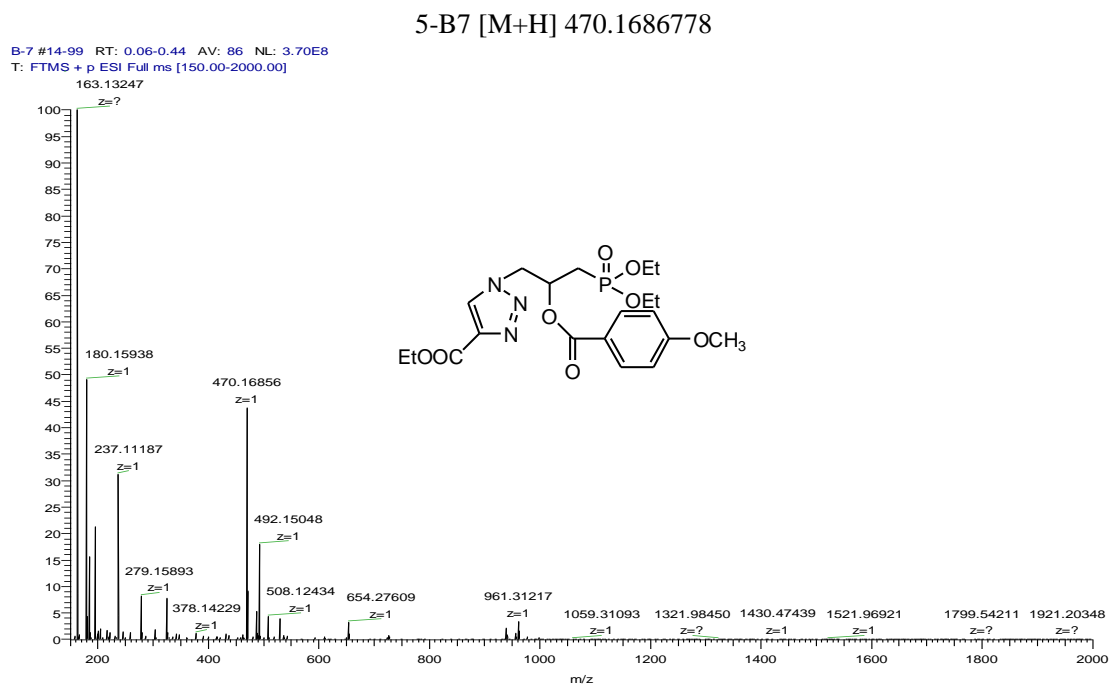

Figure S75. HRMS spectrum of compound 5-B7.

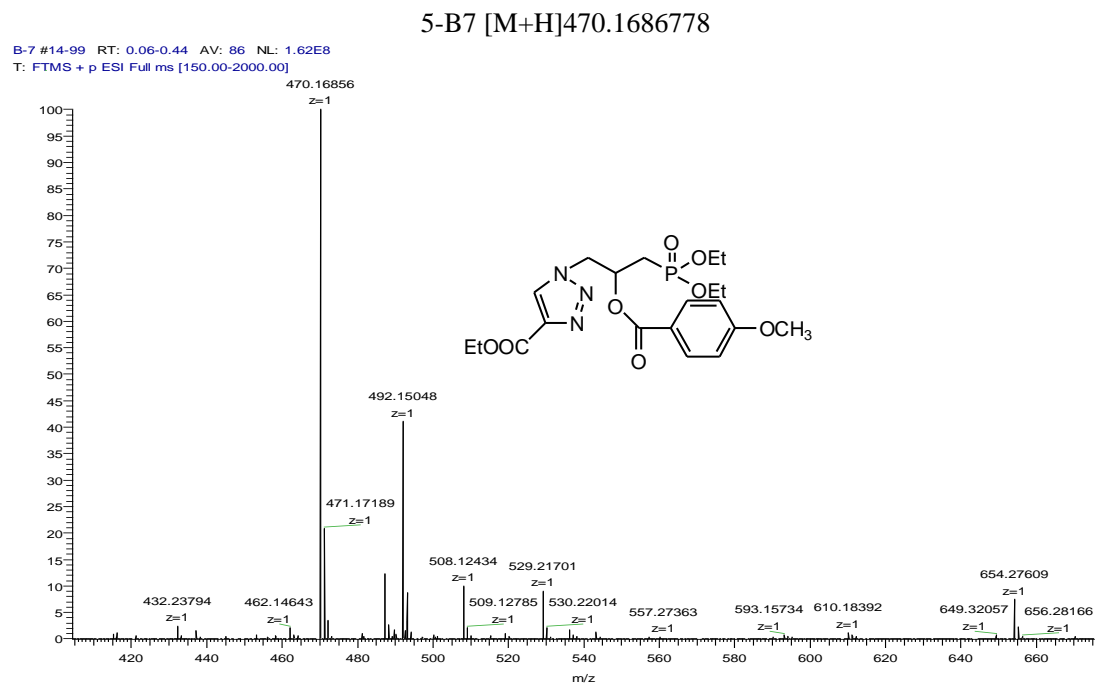Figure S76. <sup>1</sup>H-NMR spectrum of compound 5-B8.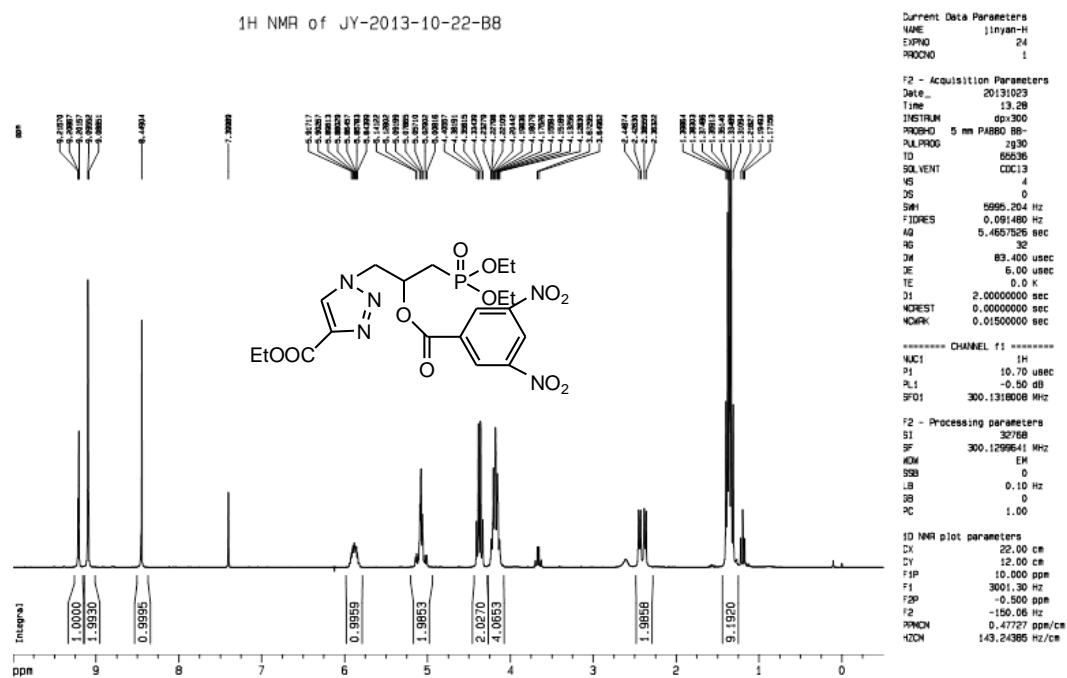

Figure S77.  $^{13}\text{C}$ -NMR spectrum of compound 5-B8.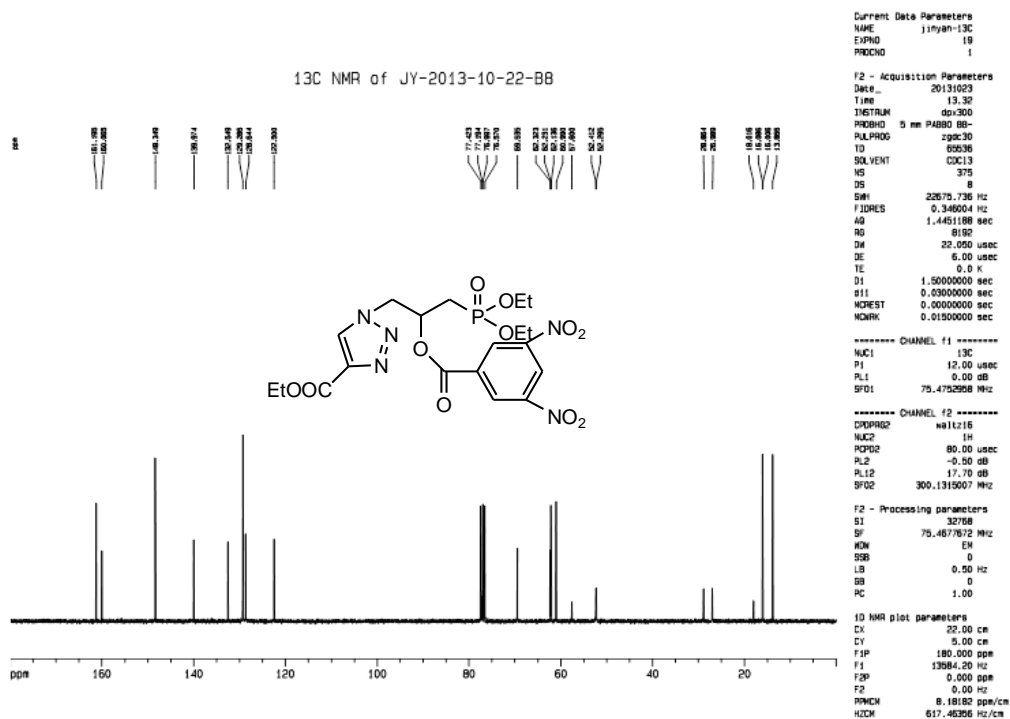Figure S78.  $^{31}\text{P}$ -NMR spectrum of compound 5-B8.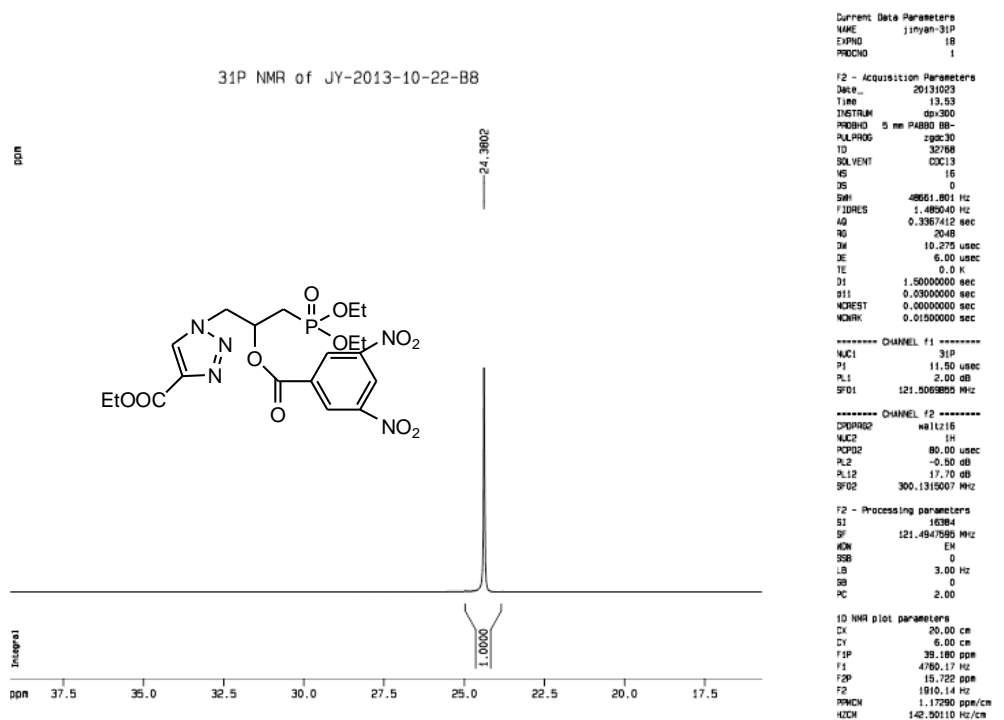

Figure S79. HRMS spectrum of compound 5-B8.

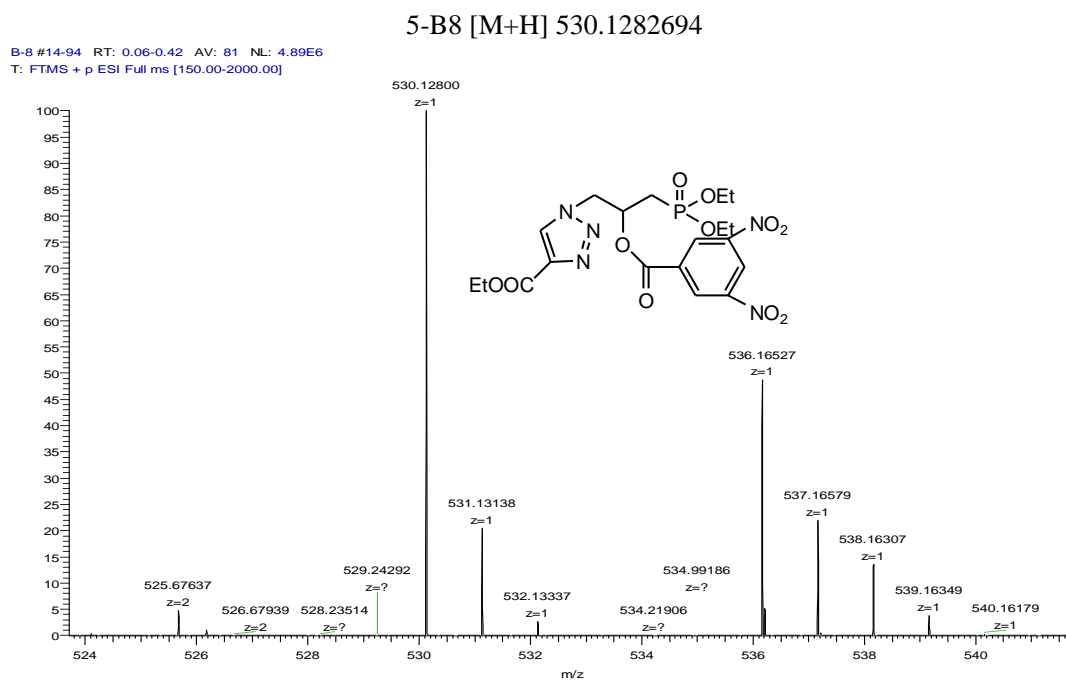Figure S80. <sup>1</sup>H-NMR spectrum of compound 5-C1.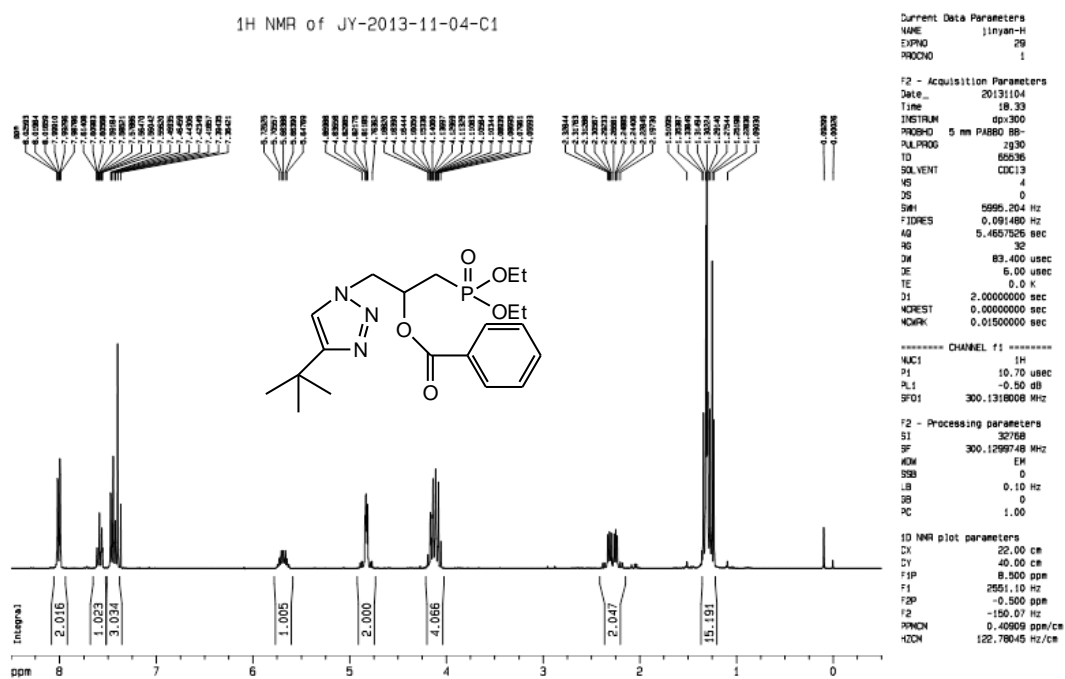



Figure S81.  $^{13}\text{C}$ -NMR spectrum of compound 5-C1.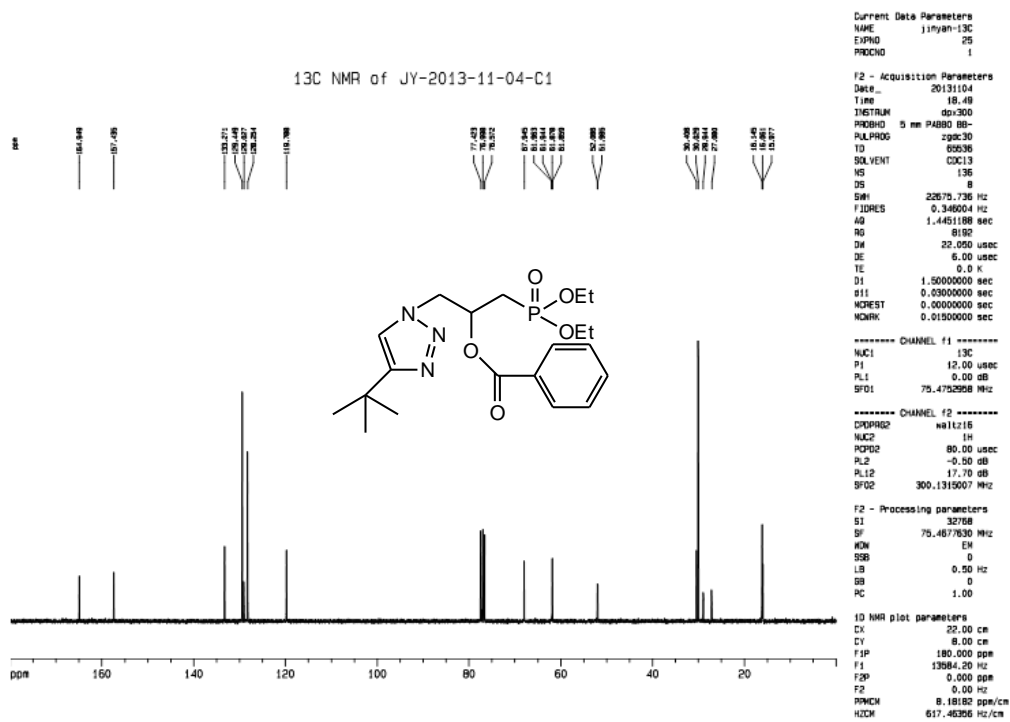Figure S82.  $^{31}\text{P}$ -NMR spectrum of compound 5-C1.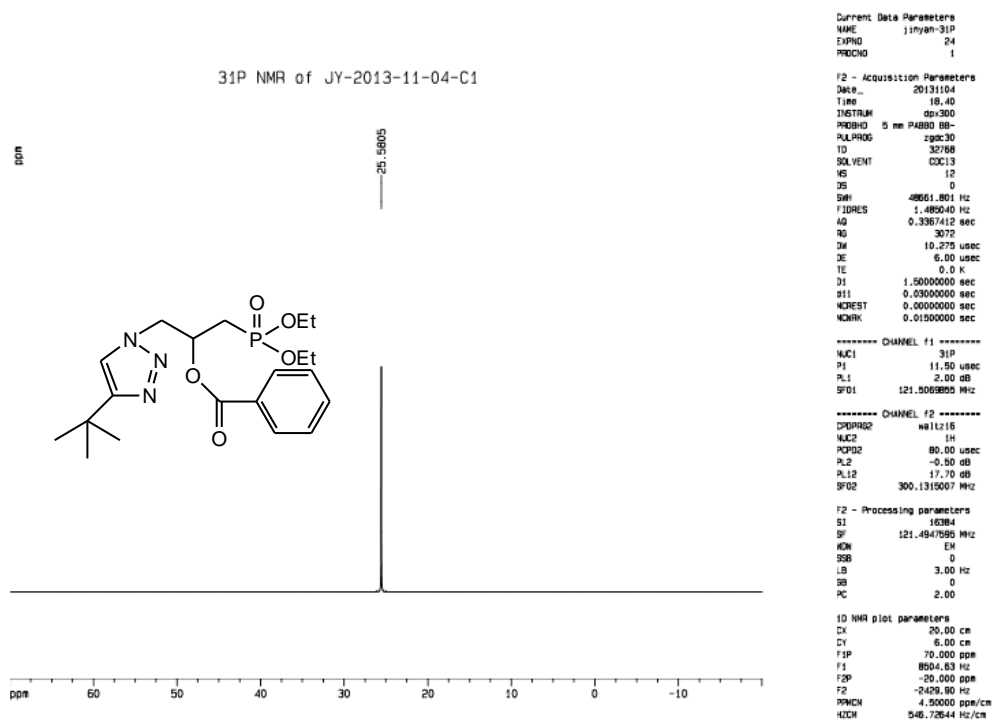

Figure S83. HRMS spectrum of compound 5-C1.

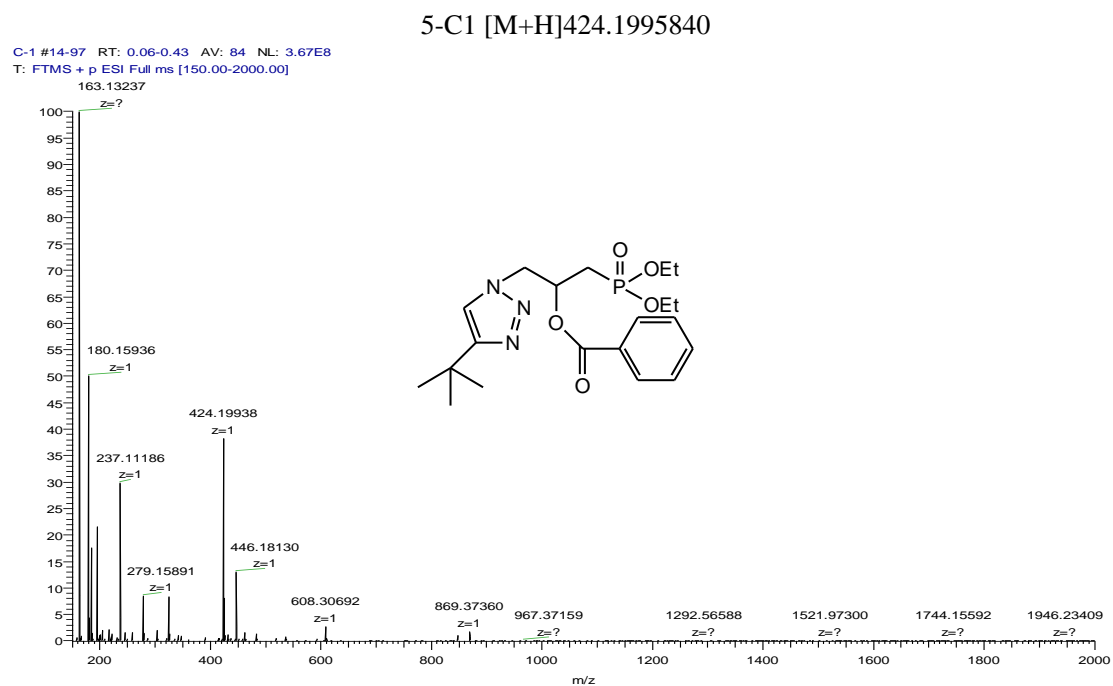

Figure S84. HRMS spectrum of compound 5-C1.

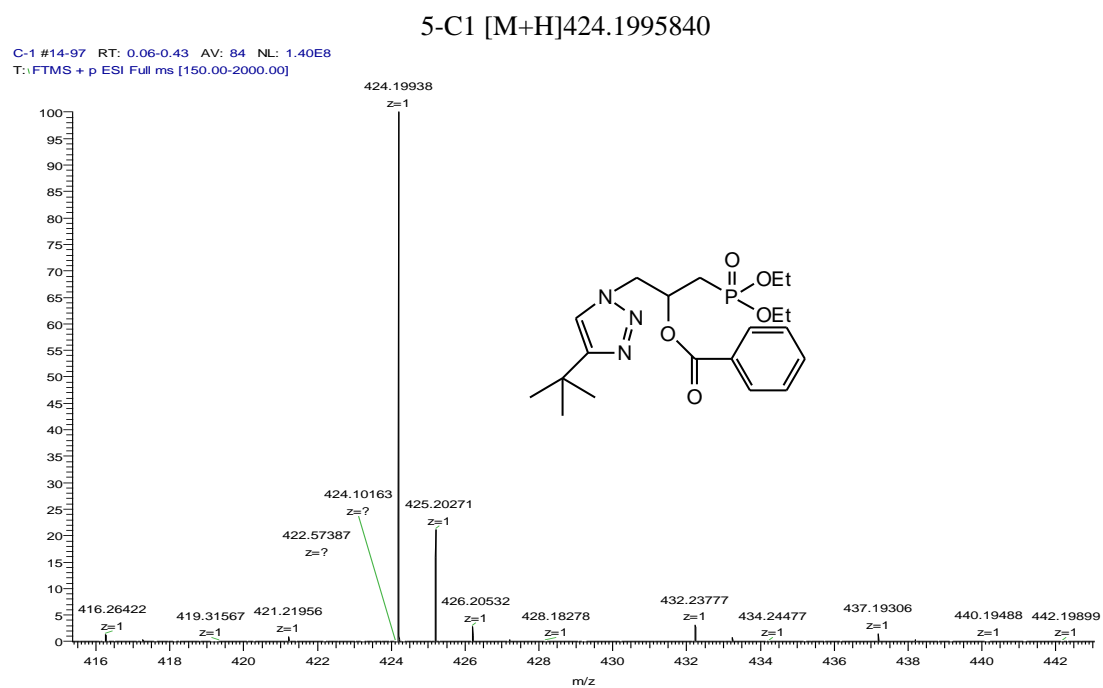



Figure S87.  $^{31}\text{P}$ -NMR spectrum of compound 5-C2.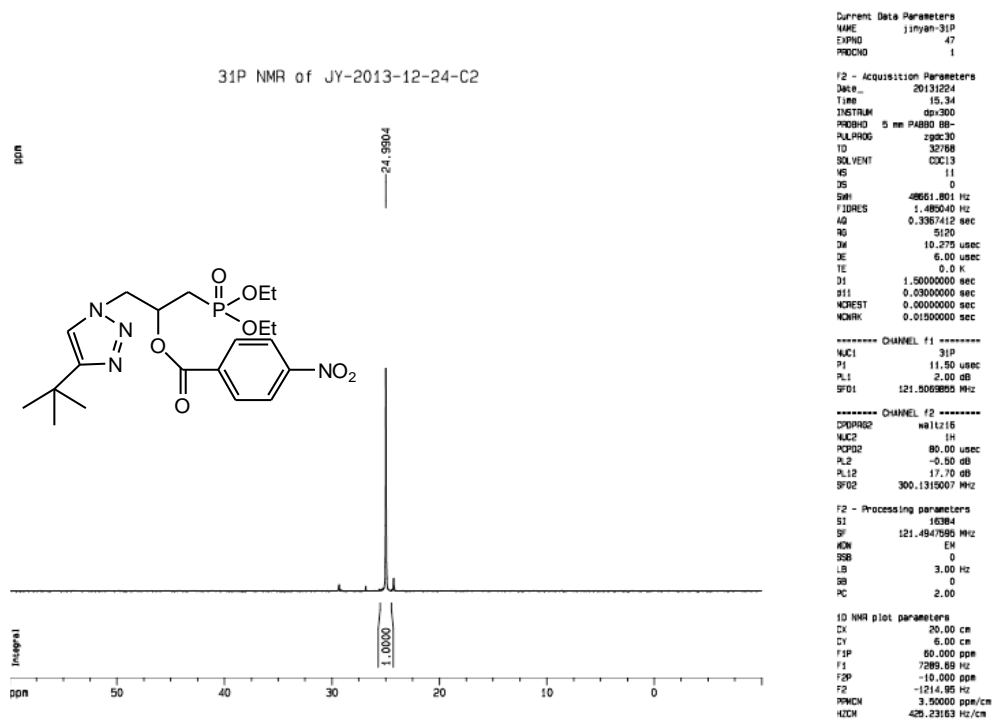

Figure S88. HRMS spectrum of compound 5-C2.

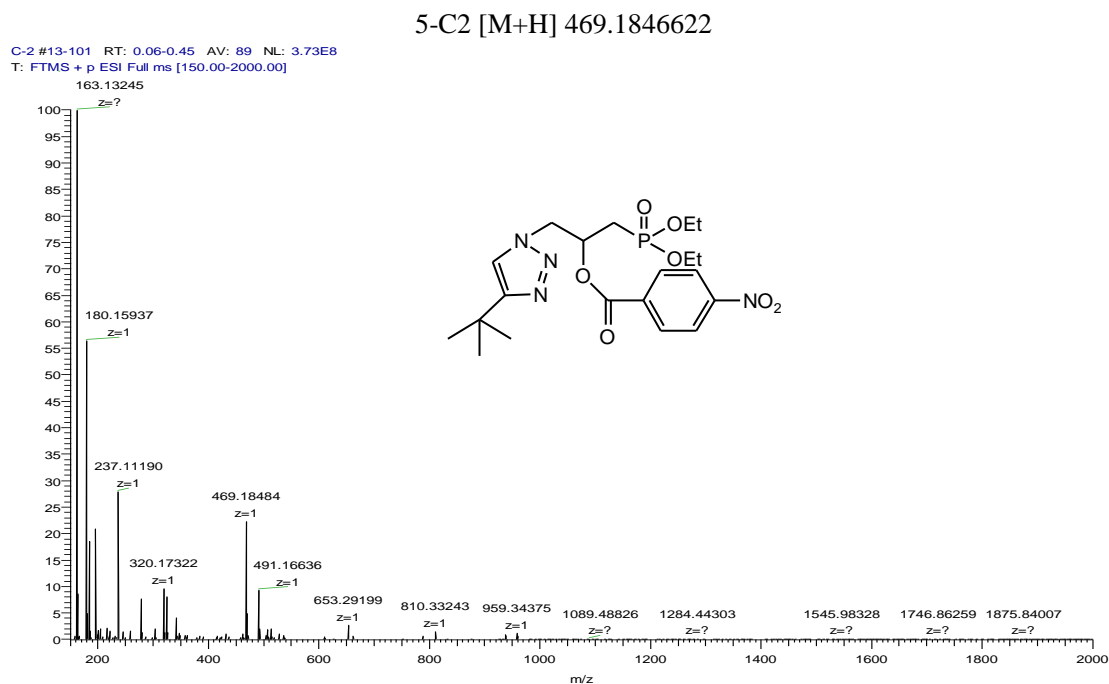

Figure S89. HRMS spectrum of compound 5-C2.

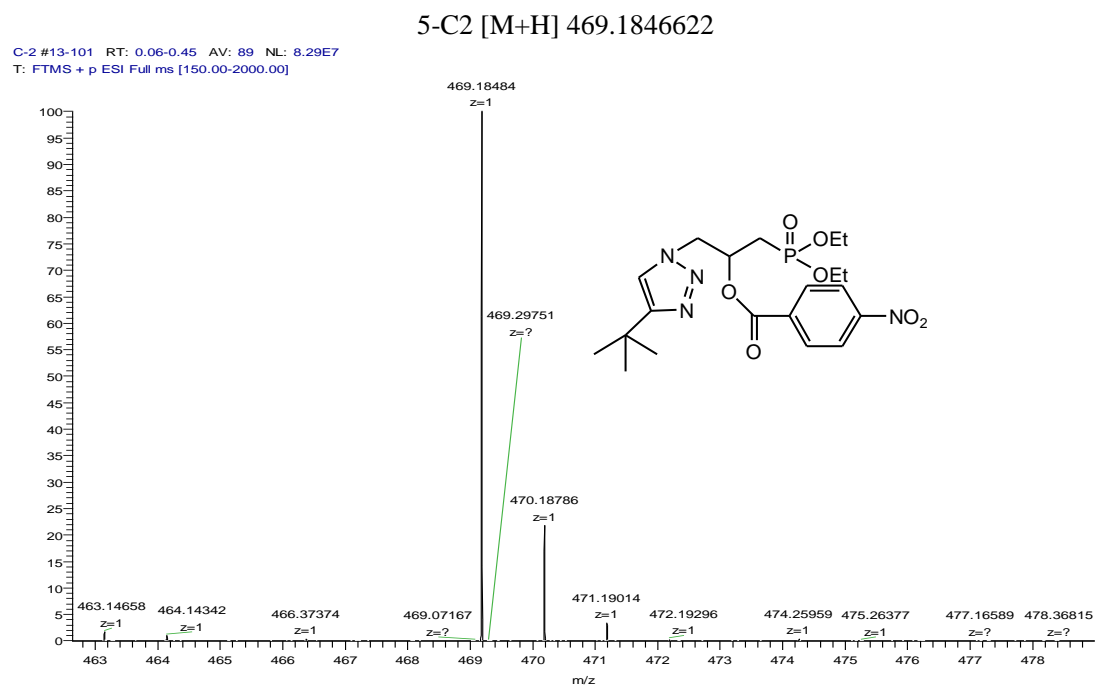Figure S90. <sup>1</sup>H-NMR spectrum of compound 5-C3.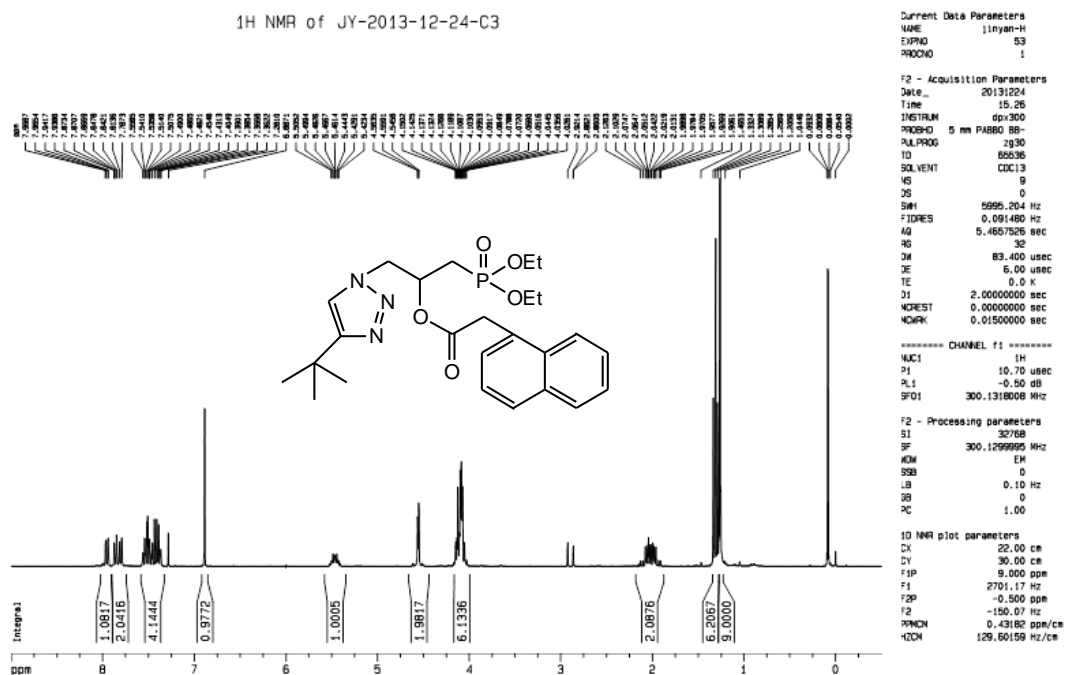

Figure S91.  $^{13}\text{C}$ -NMR spectrum of compound 5-C3.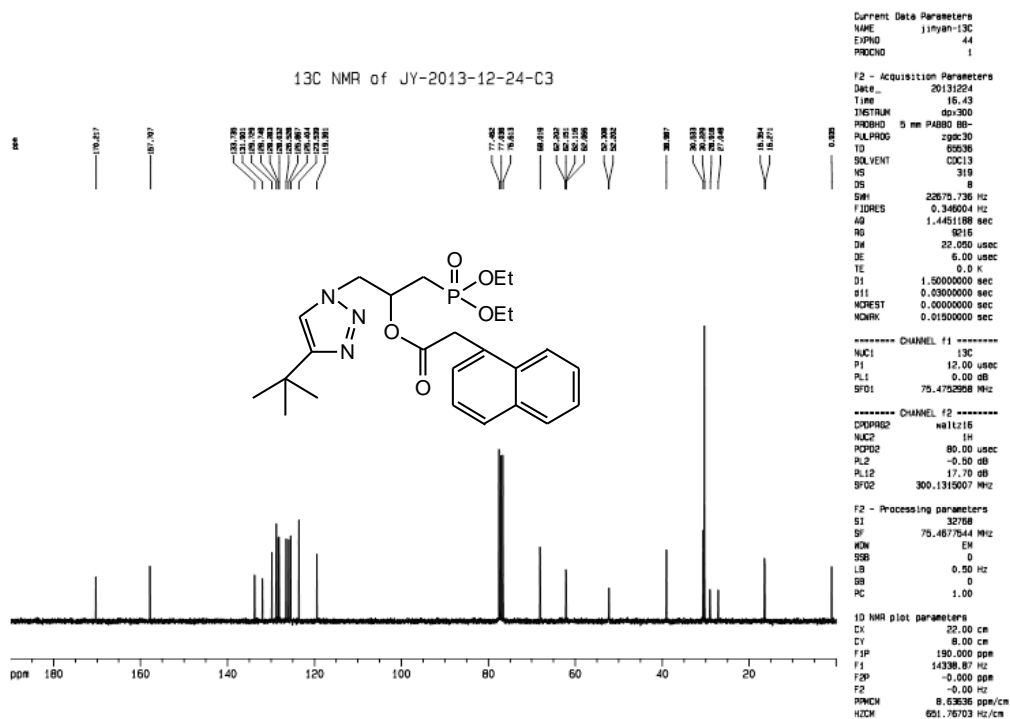Figure S92.  $^{31}\text{P}$ -NMR spectrum of compound 5-C3.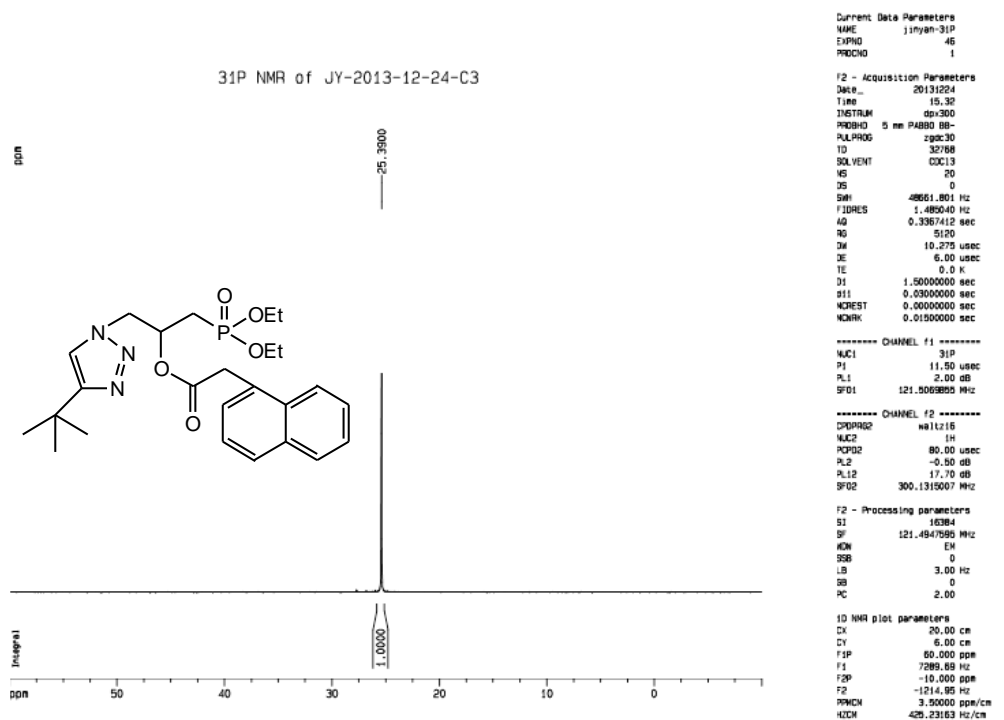

Figure S93. HRMS spectrum of compound 5-C3.

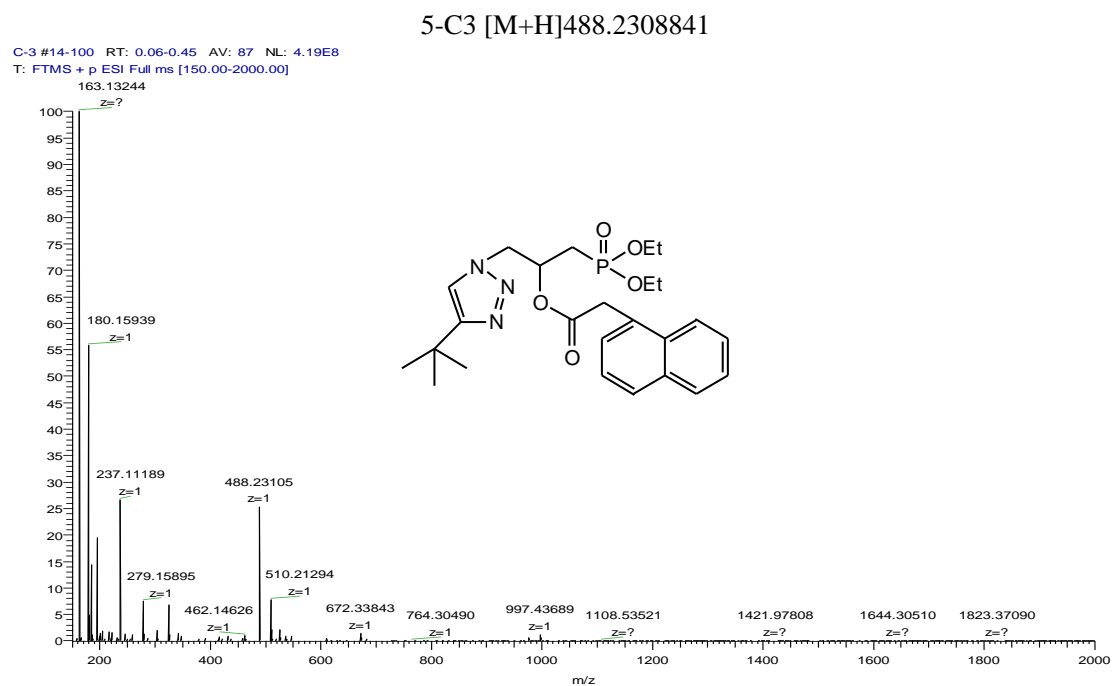

Figure S94. HRMS spectrum of compound 5-C3.

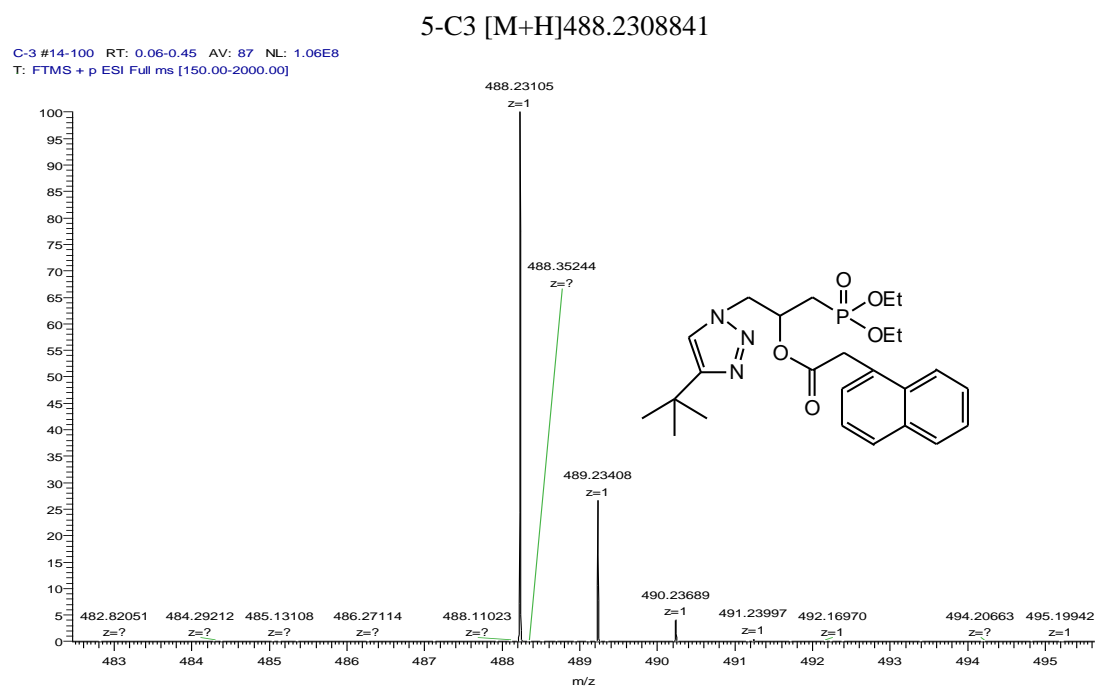

Figure S95. <sup>1</sup>H-NMR spectrum of compound 5-C4.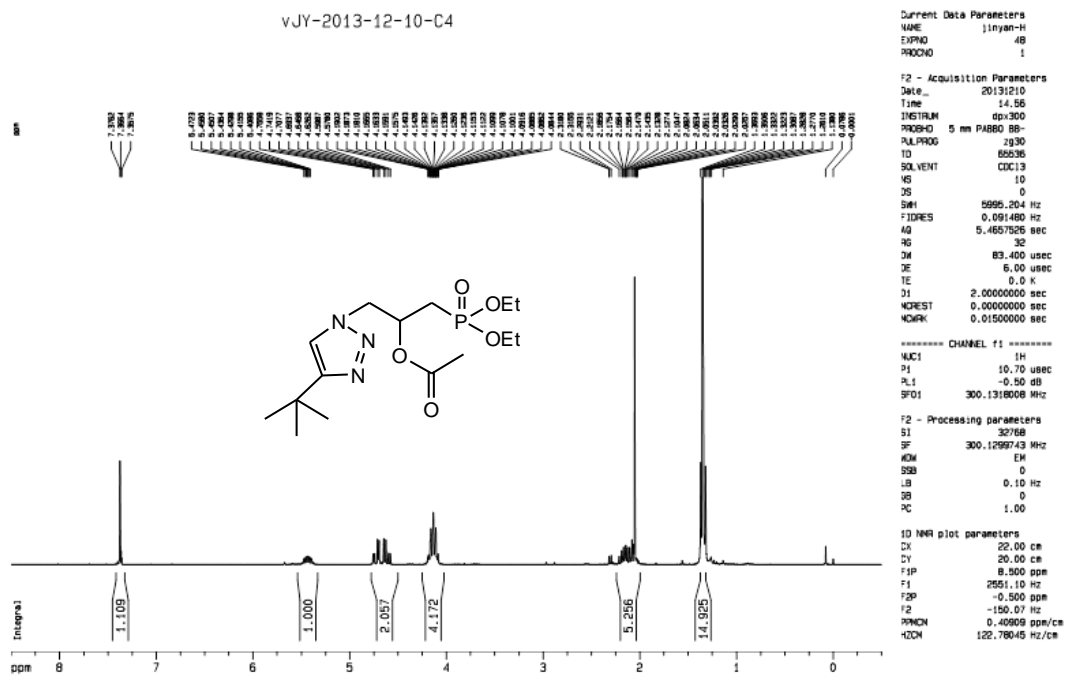Figure S96. <sup>13</sup>C-NMR spectrum of compound 5-C4.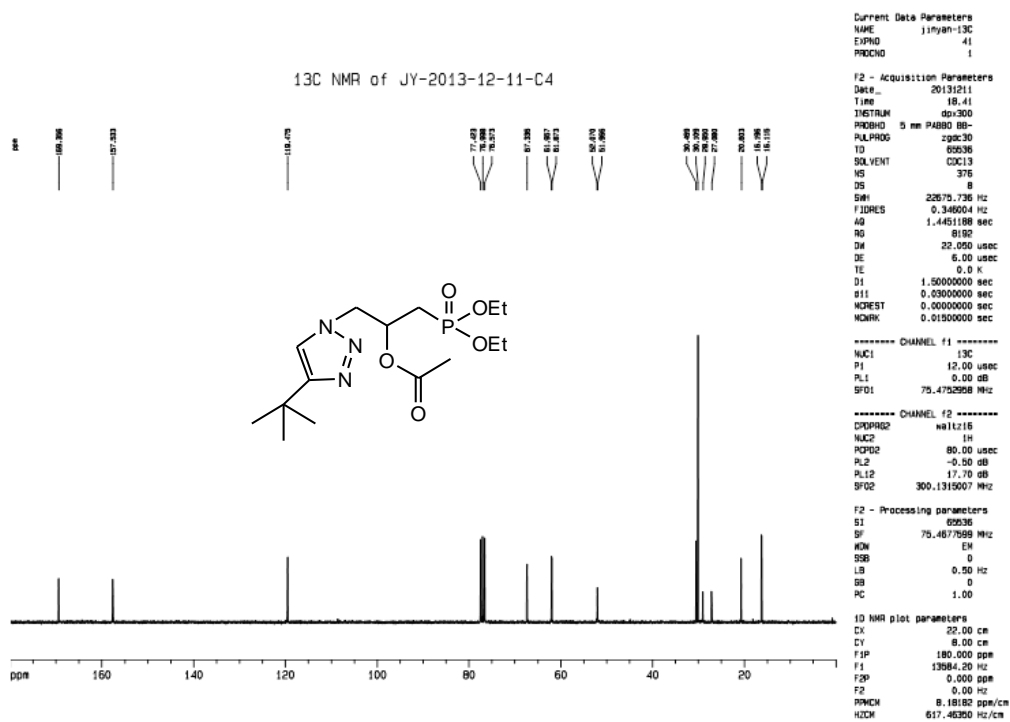



Figure S97.  $^{31}\text{P}$ -NMR spectrum of compound 5-C4.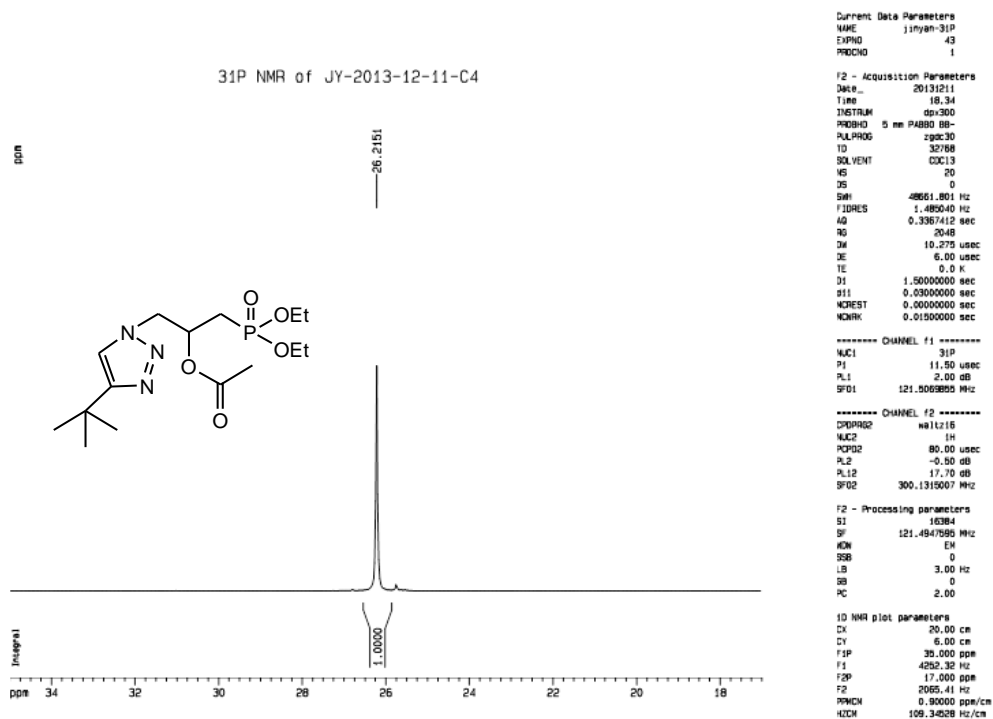

Figure S98. HRMS spectrum of compound 5-C4.

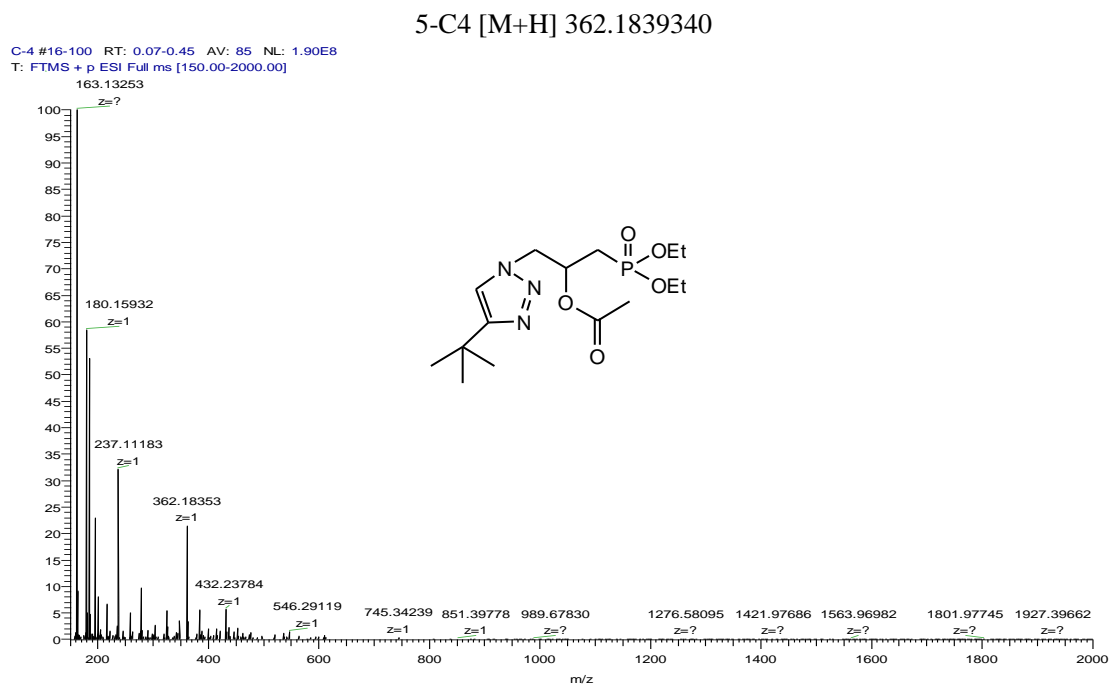

Figure S99. HRMS spectrum of compound 5-C4.

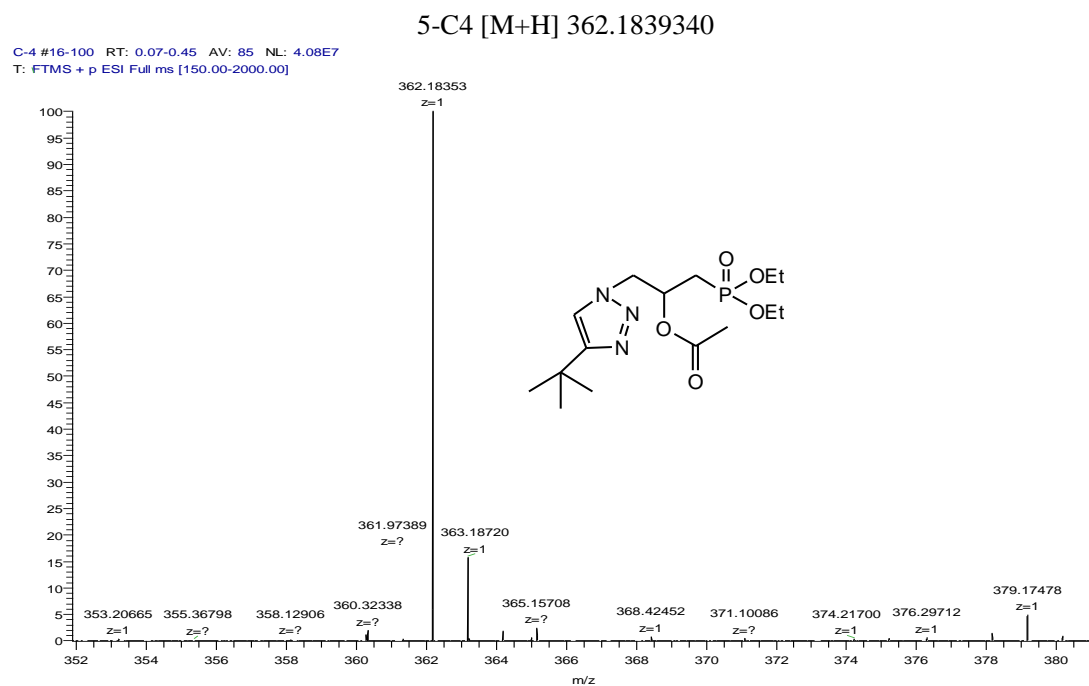Figure S100. <sup>1</sup>H-NMR spectrum of compound 5-C5.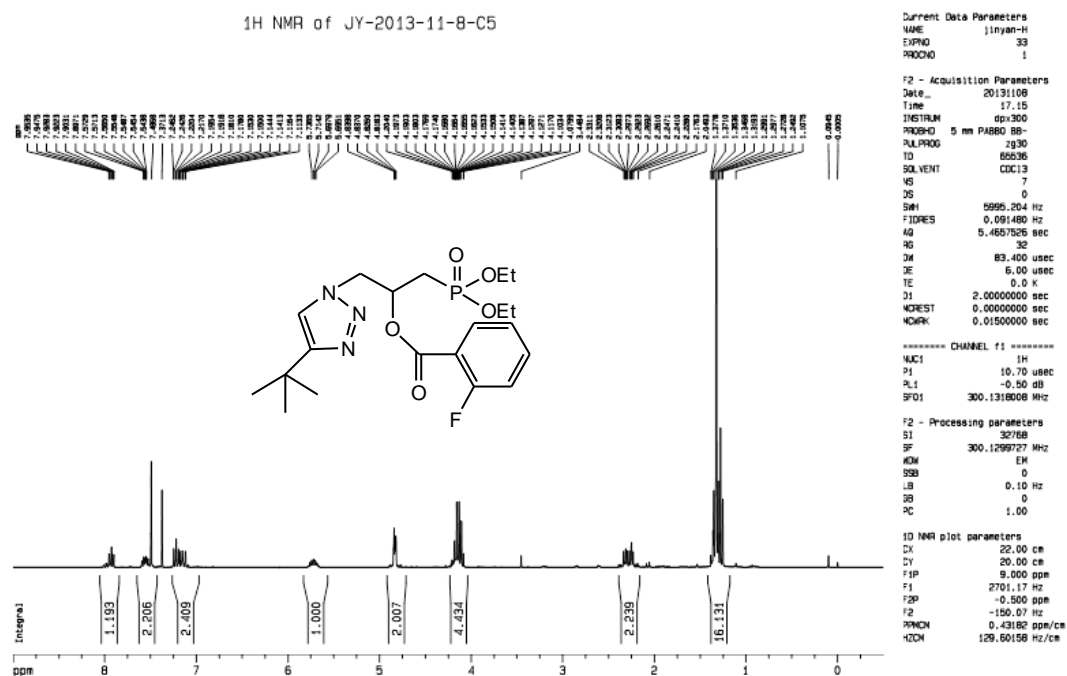

Figure S101.  $^{13}\text{C}$ -NMR spectrum of compound 5-C5.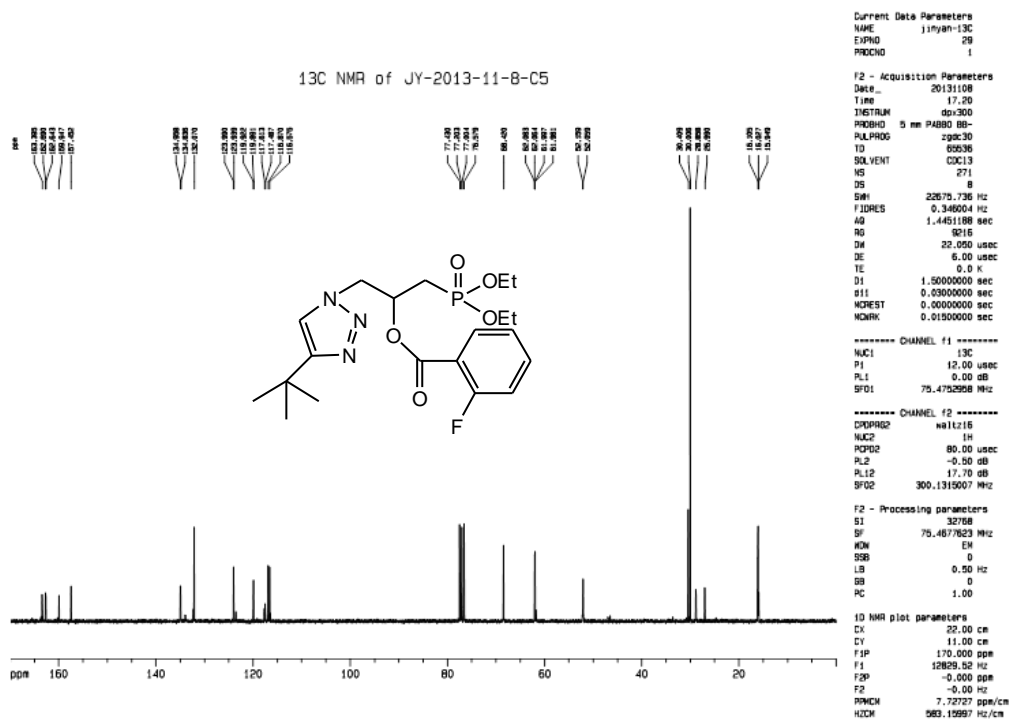Figure S102.  $^{31}\text{P}$ -NMR spectrum of compound 5-C5.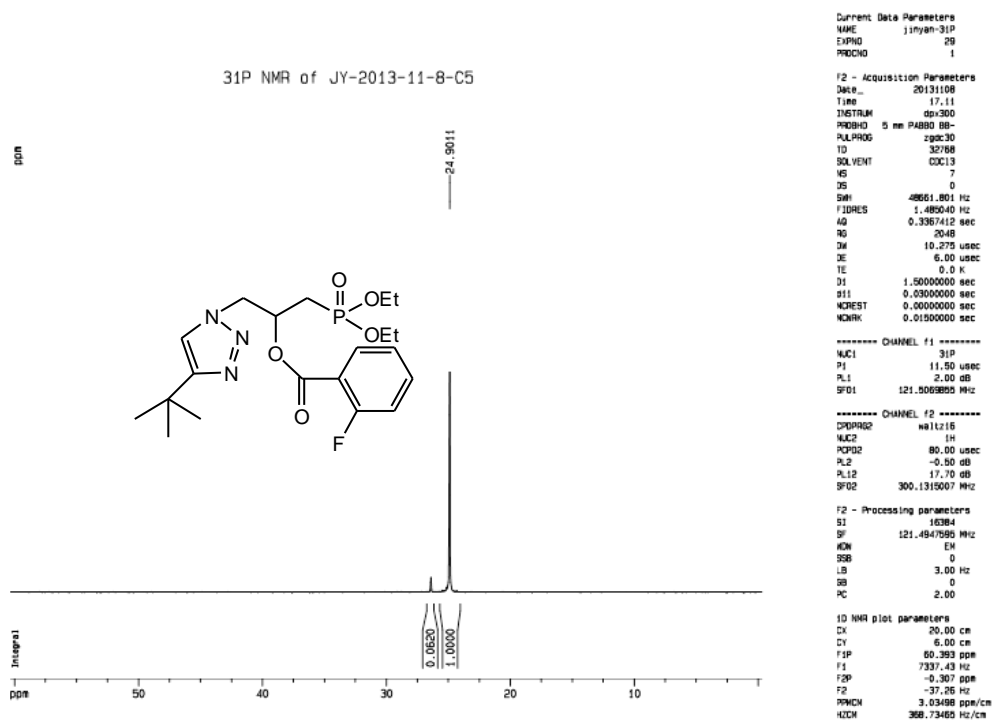

Figure S103. HRMS spectrum of compound 5-C5.

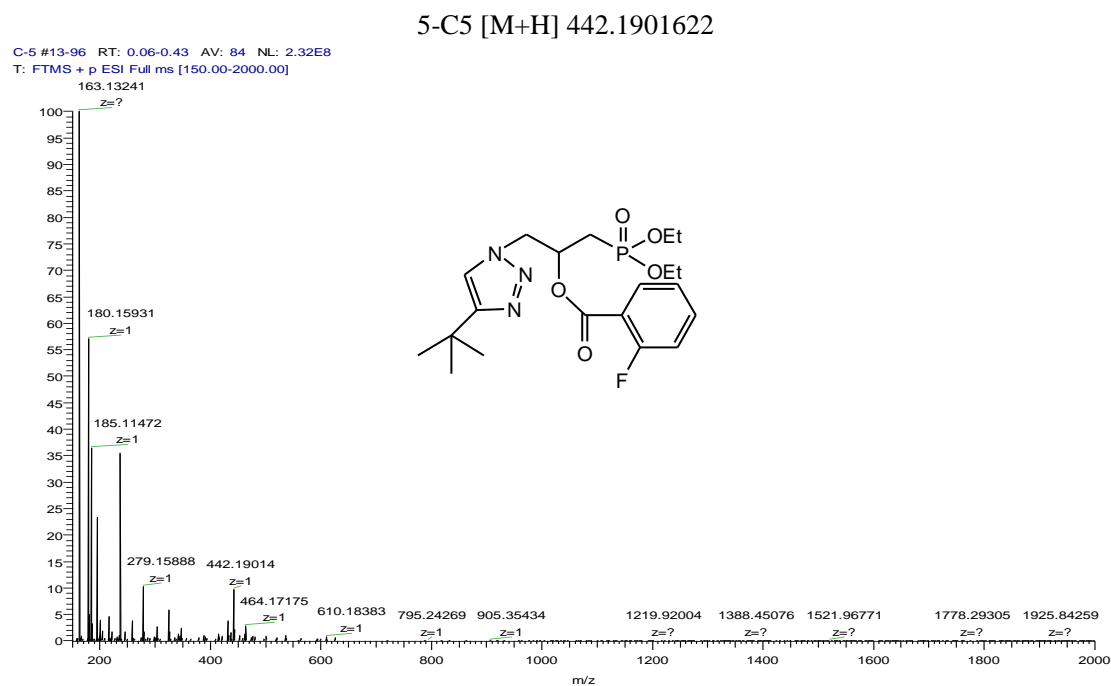

Figure S104. HRMS spectrum of compound 5-C5.

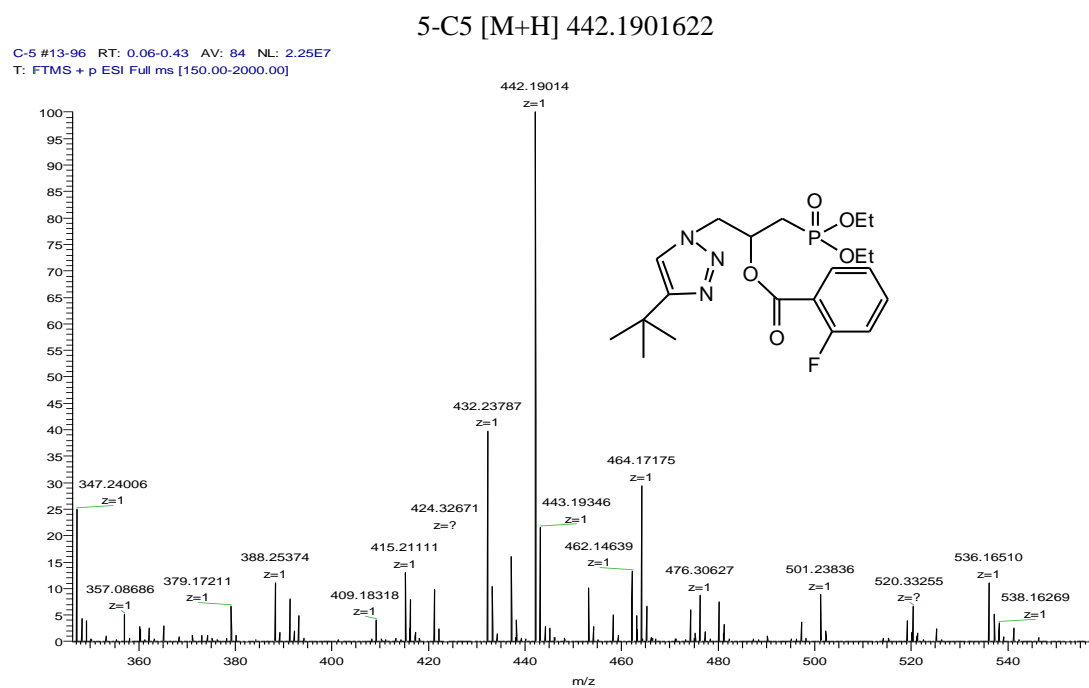

Figure S105.  $^1\text{H-NMR}$  spectrum of compound 5-C6.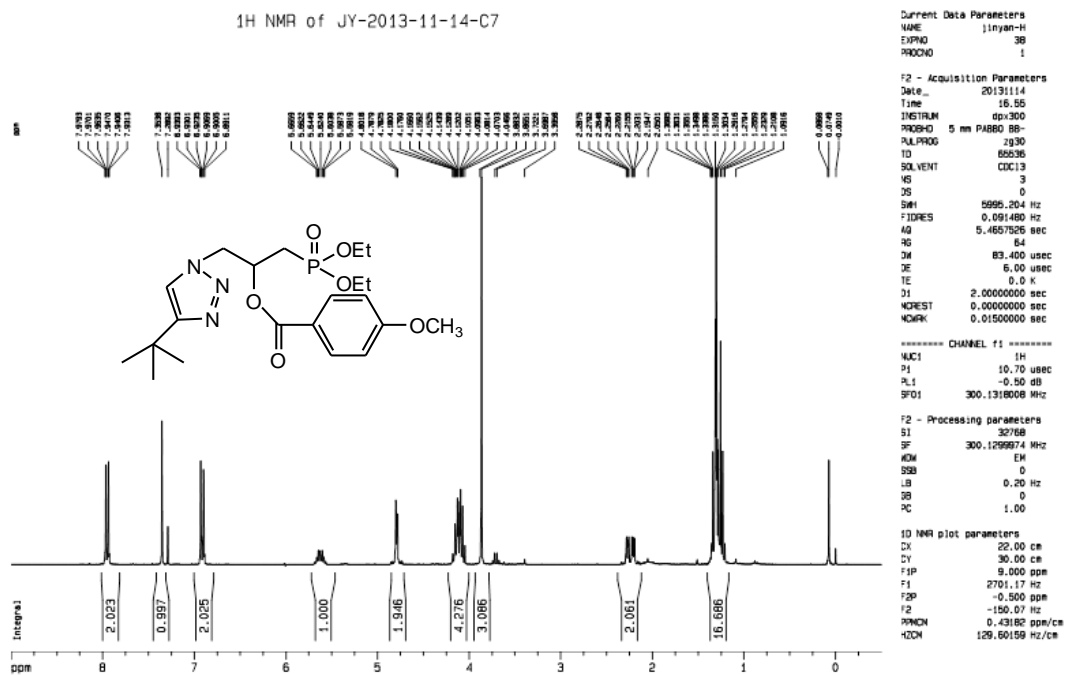Figure S106.  $^{13}\text{C-NMR}$  spectrum of compound 5-C6.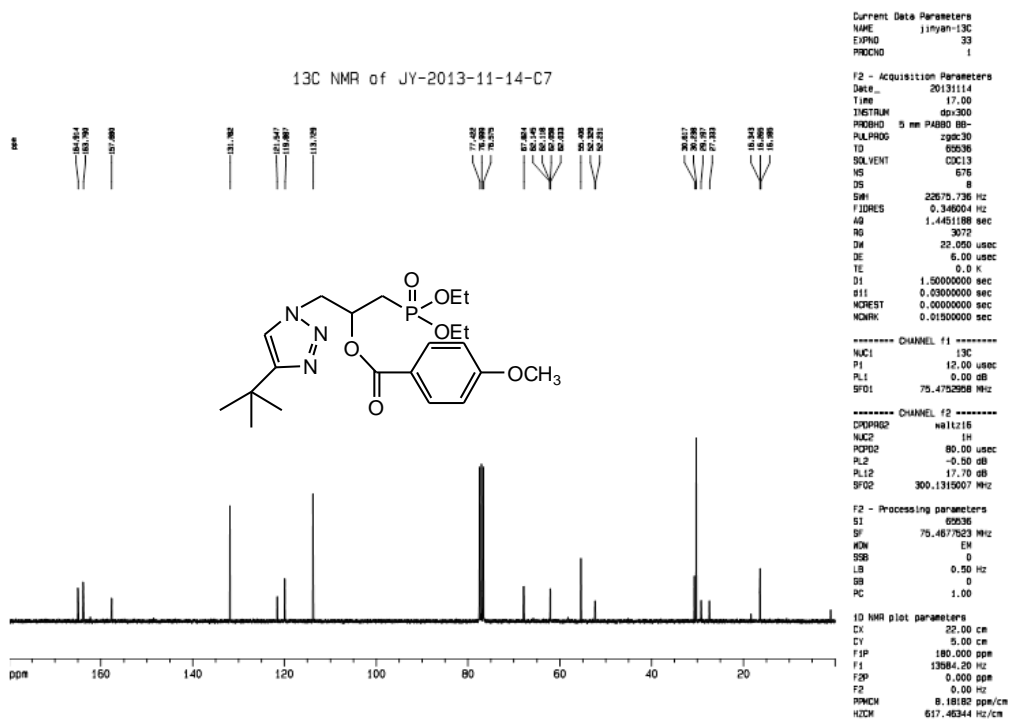

Figure S107.  $^{31}\text{P}$ -NMR spectrum of compound 5-C6.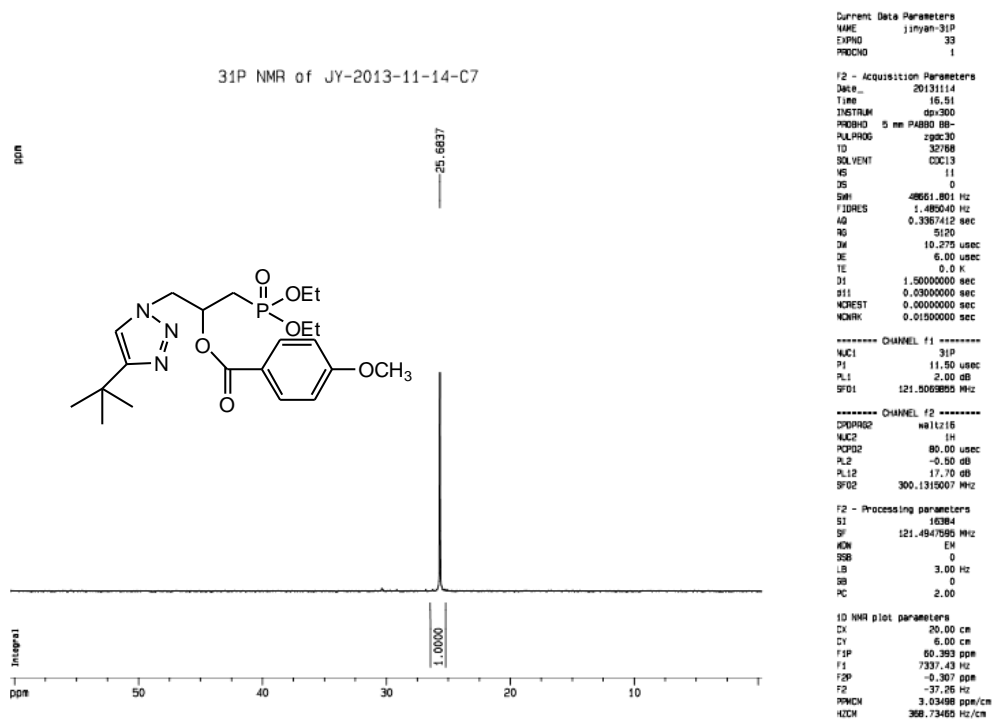

Figure S108. HRMS spectrum of compound 5-C6.

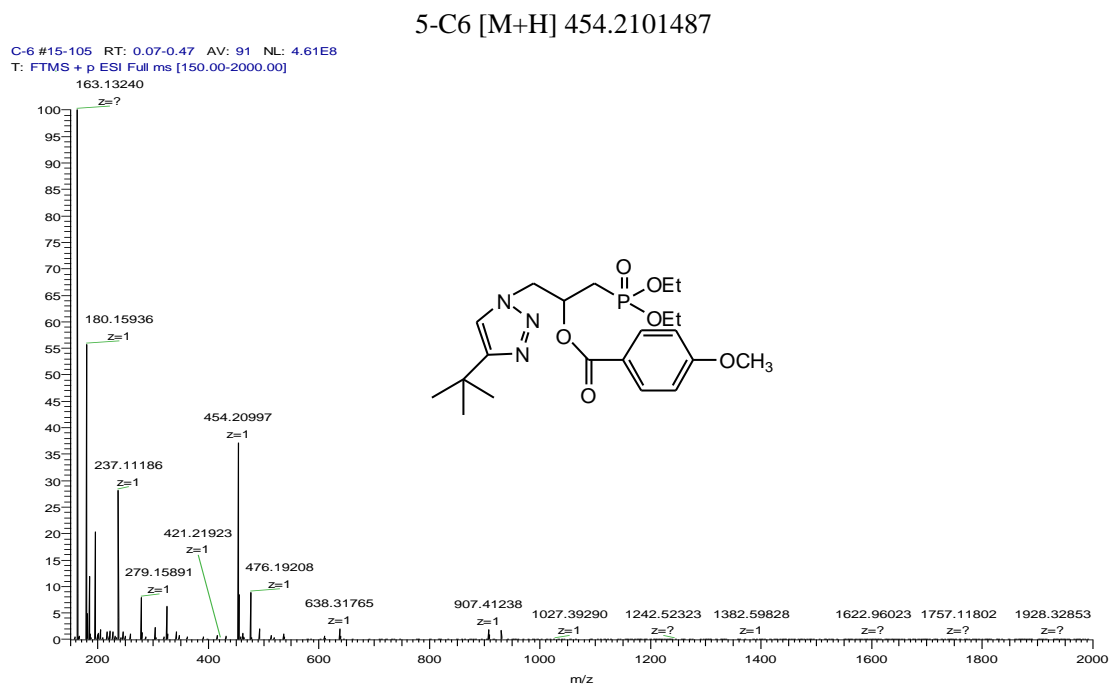

Figure S109. HRMS spectrum of compound 5-C6.

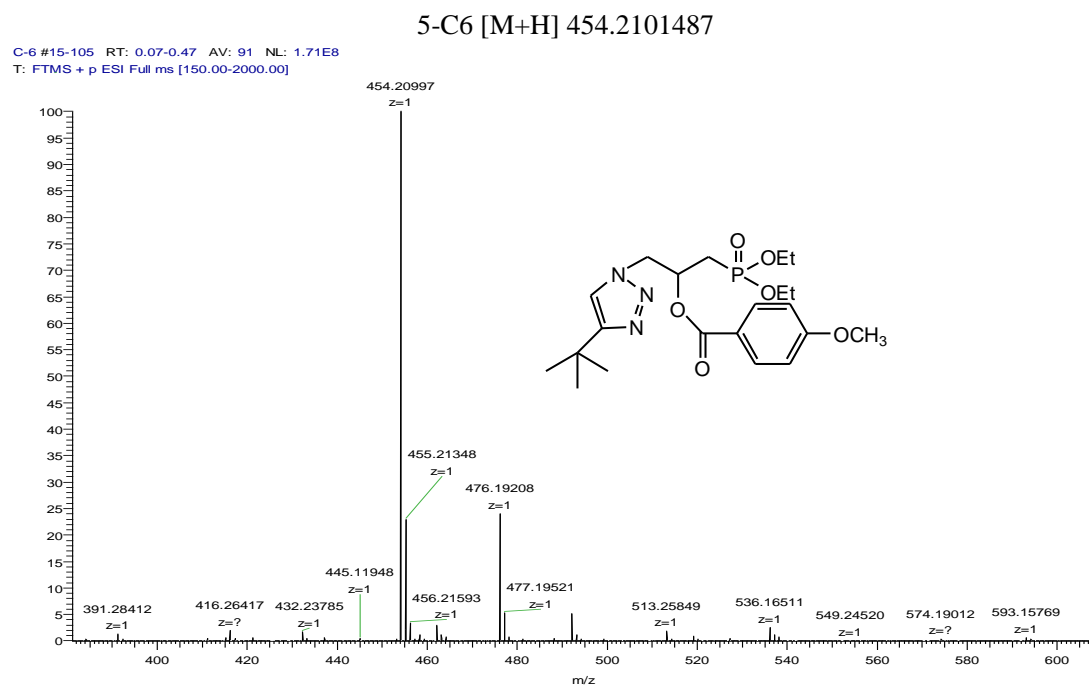Figure S110. <sup>1</sup>H-NMR spectrum of compound 5-C7.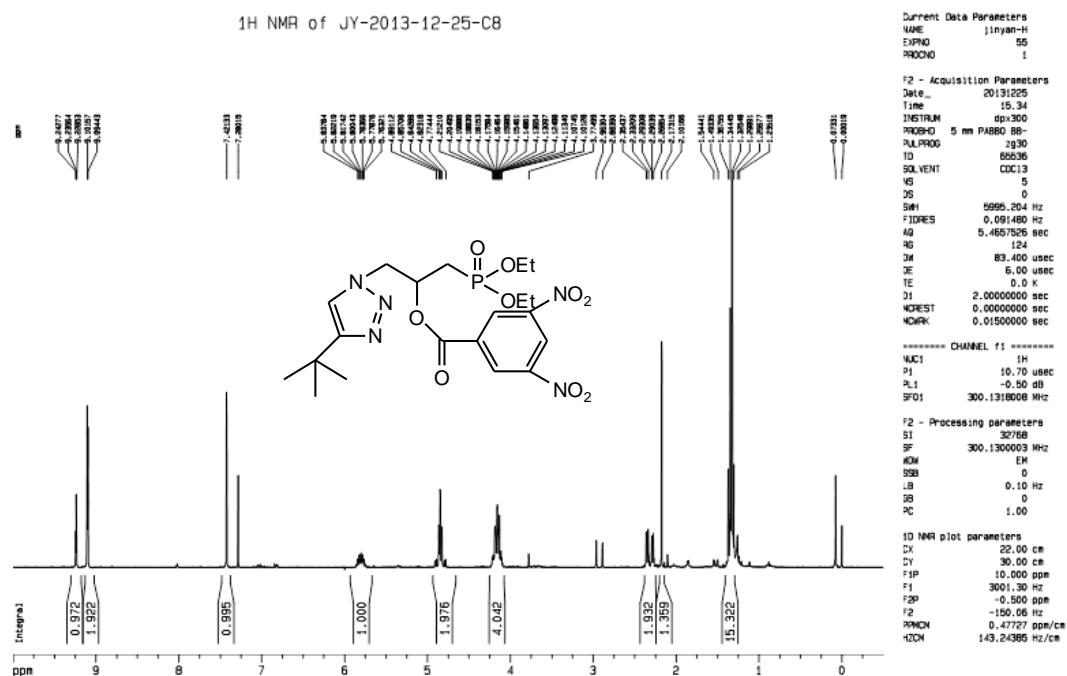

Figure S111.  $^{13}\text{C}$ -NMR spectrum of compound 5-C7.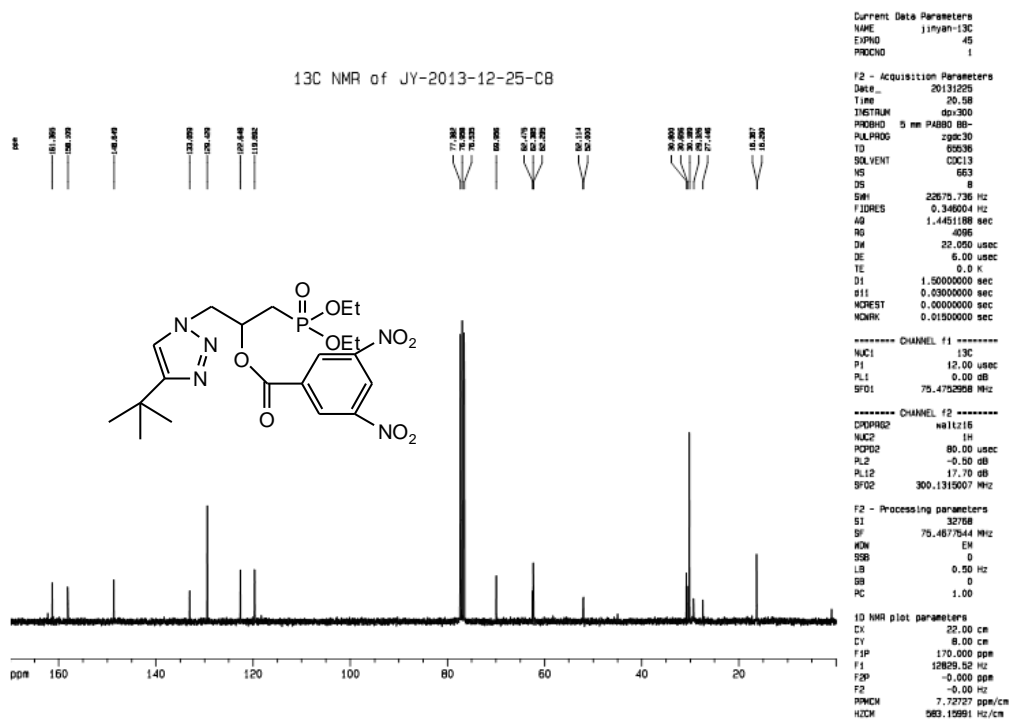Figure S112.  $^{31}\text{P}$ -NMR spectrum of compound 5-C7.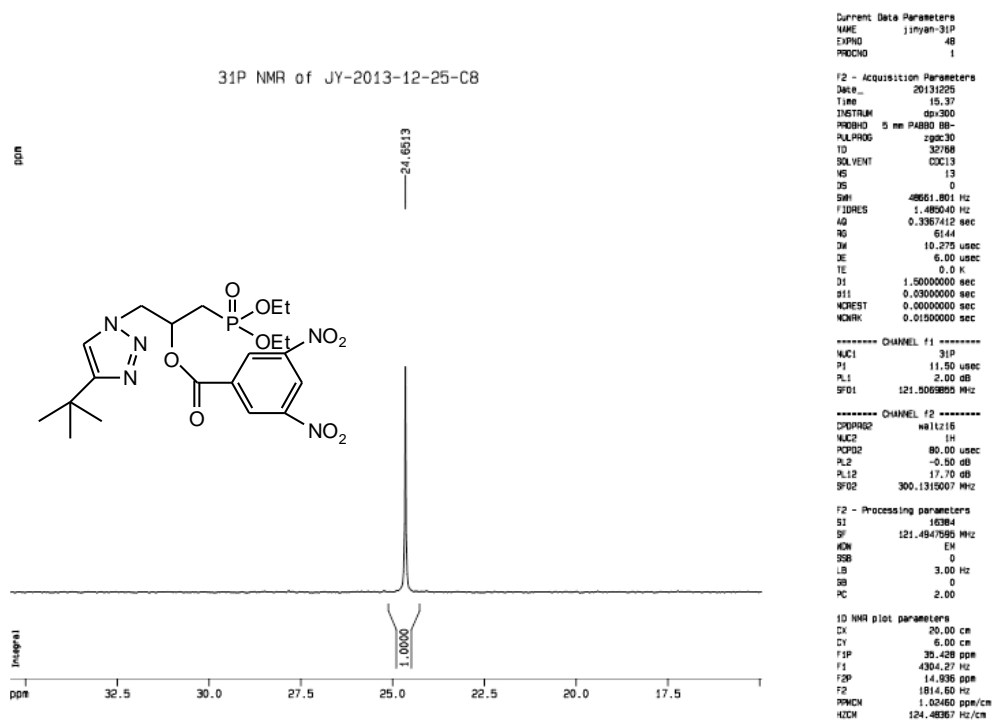



Figure S113. HRMS spectrum of compound 5-C7.

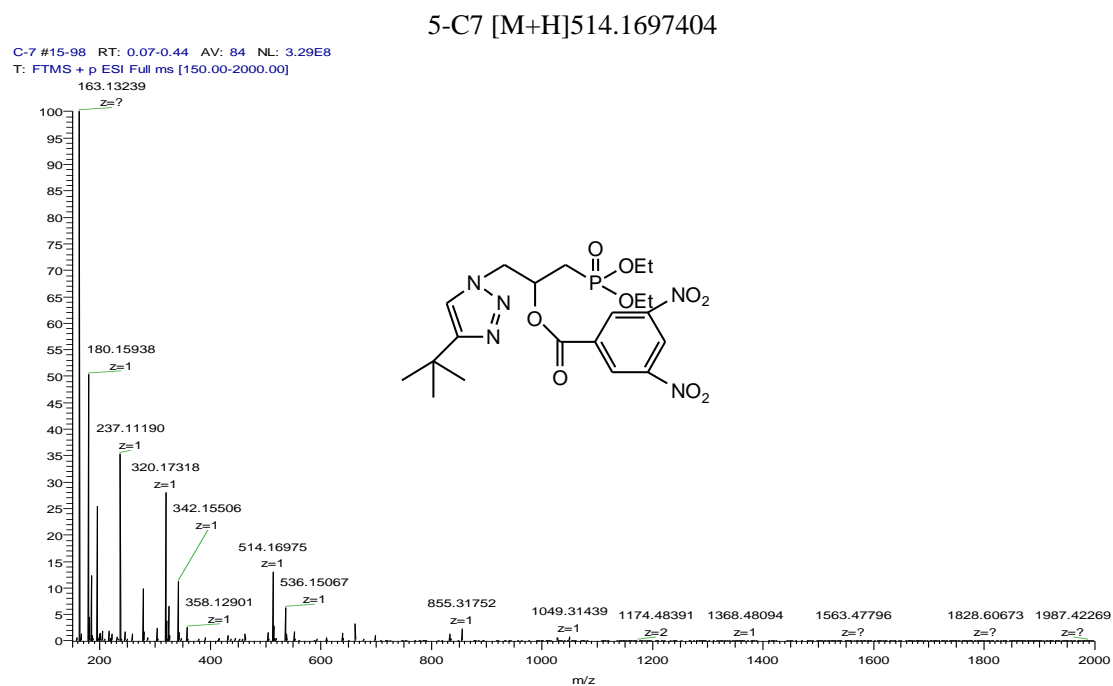

Figure S114. HRMS spectrum of compound 5-C7.

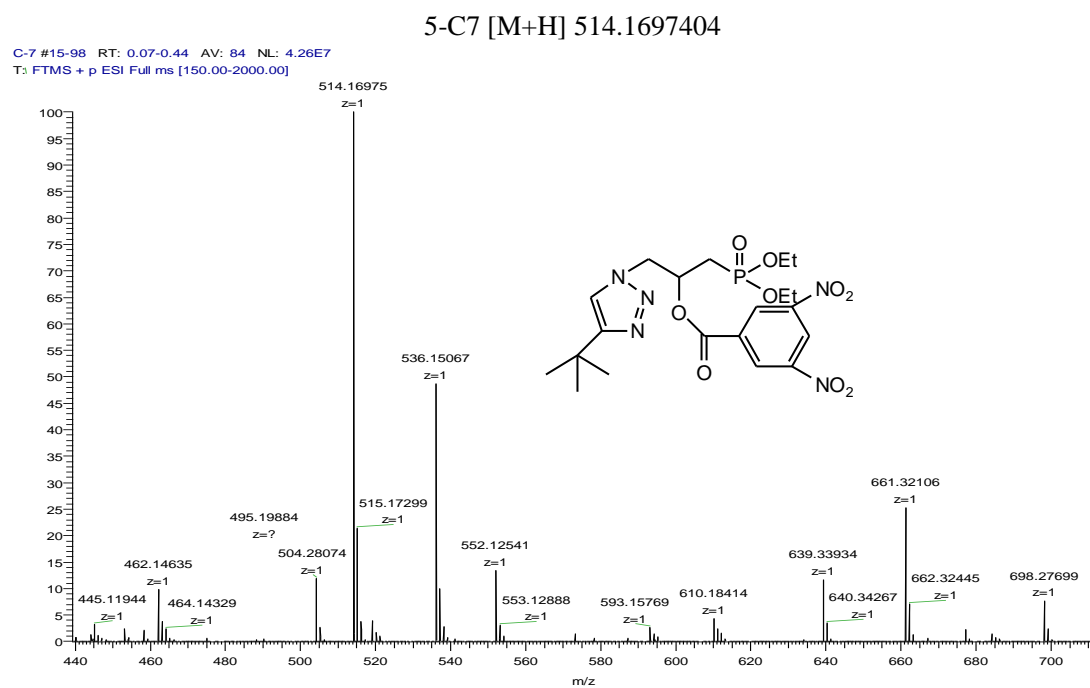

Figure S115. <sup>1</sup>H-NMR spectrum of compound 5-D1.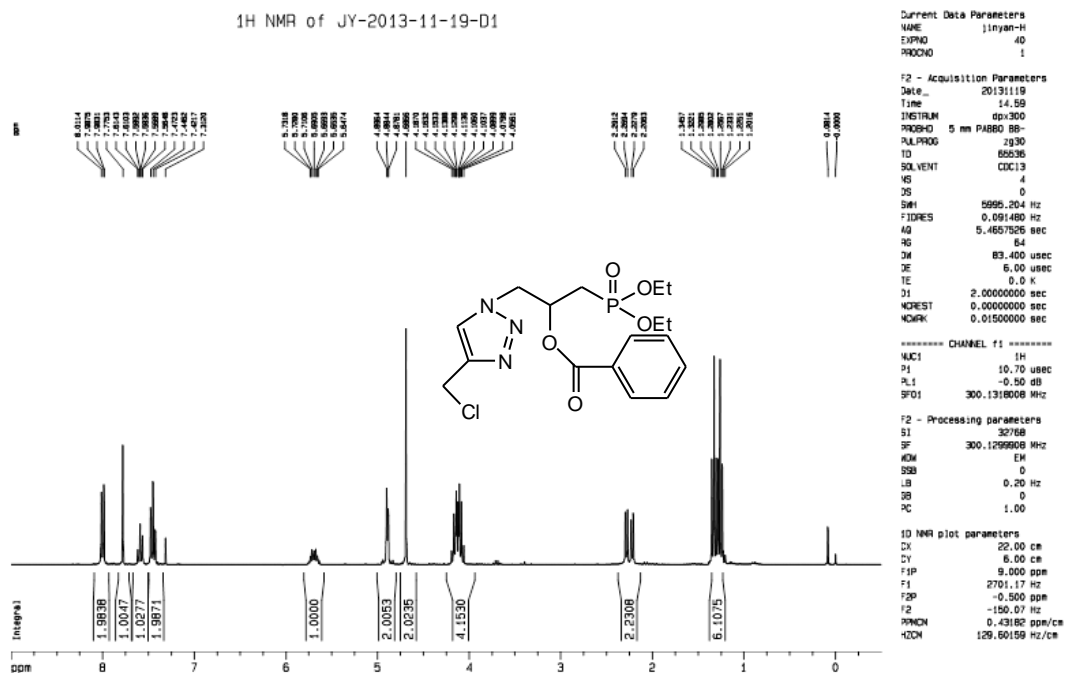Figure S116. <sup>13</sup>C-NMR spectrum of compound 5-D1.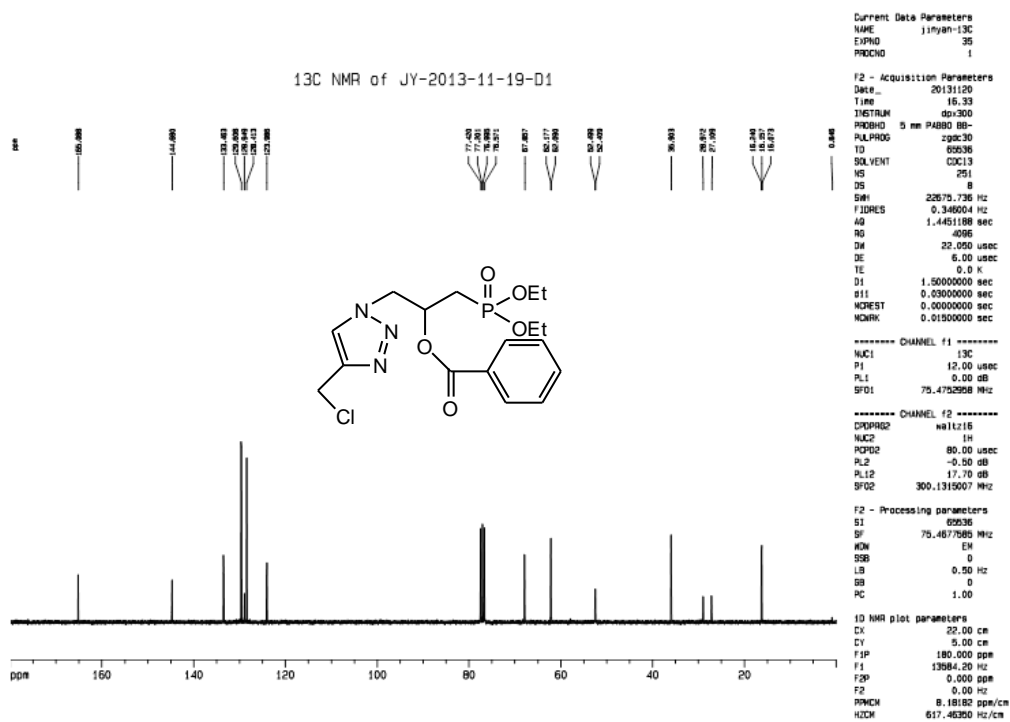

Figure S117.  $^{31}\text{P}$ -NMR spectrum of compound 5-D1.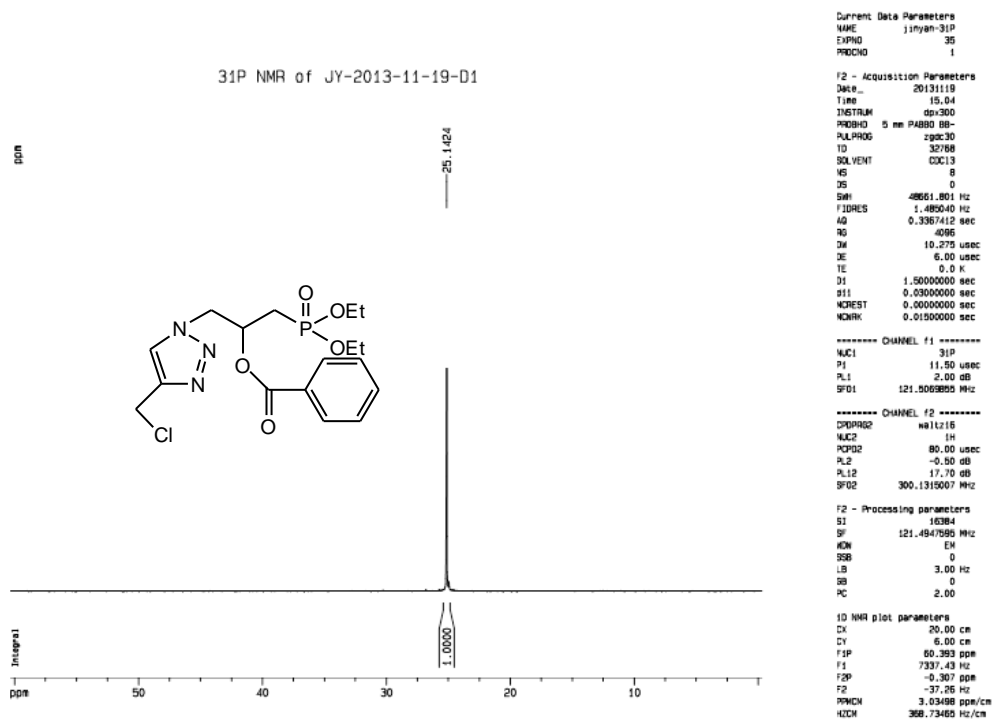

Figure S118. HRMS spectrum of compound 5-D1.

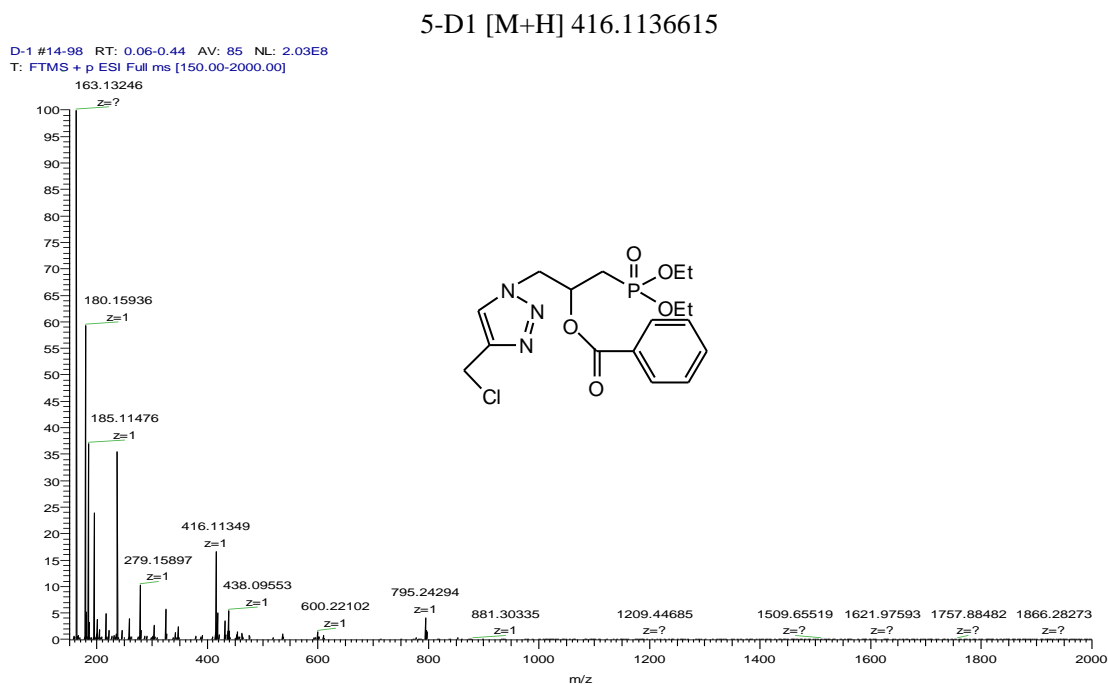

Figure S119. HRMS spectrum of compound 5-D1.

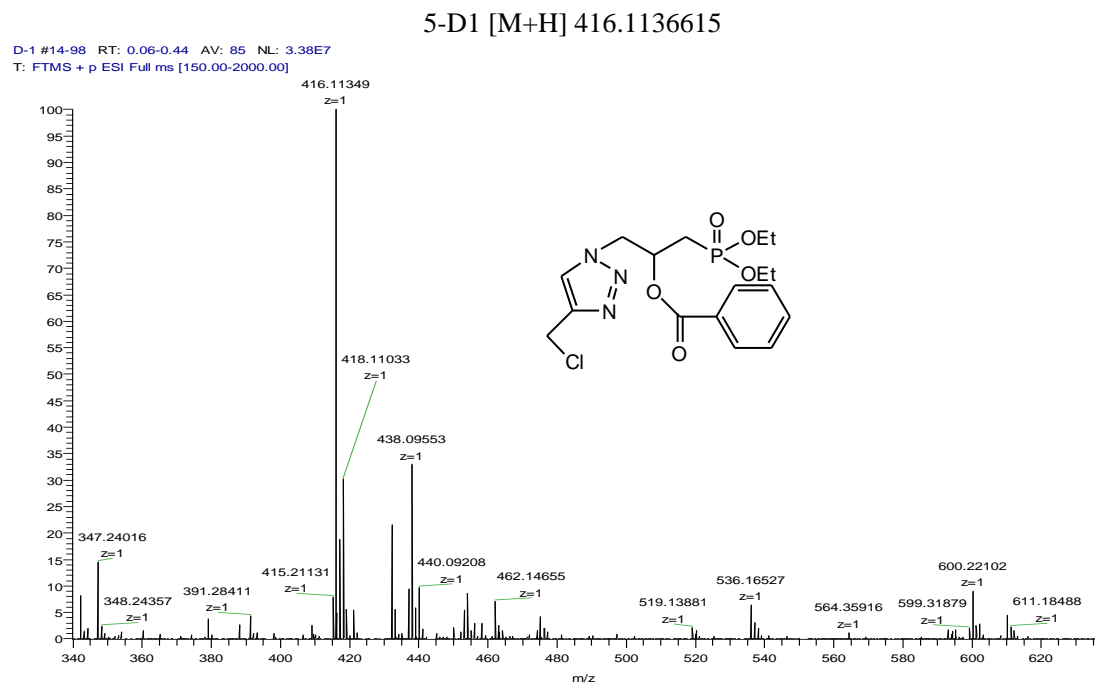Figure S120. <sup>1</sup>H-NMR spectrum of compound 5-D2.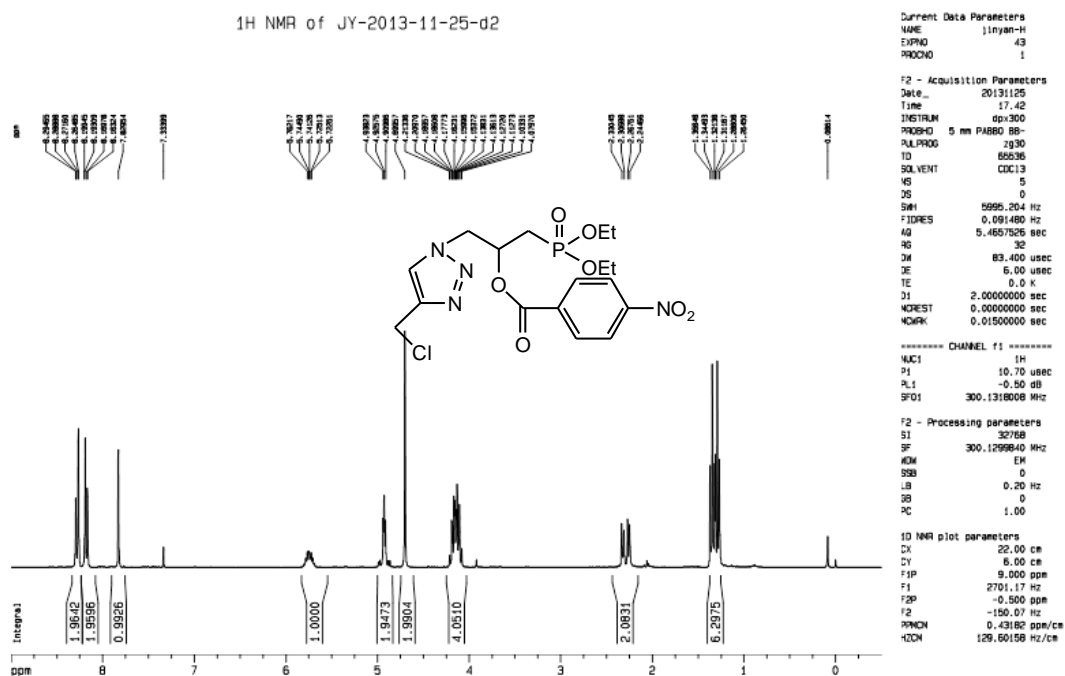

Figure S121.  $^{13}\text{C}$ -NMR spectrum of compound 5-D2.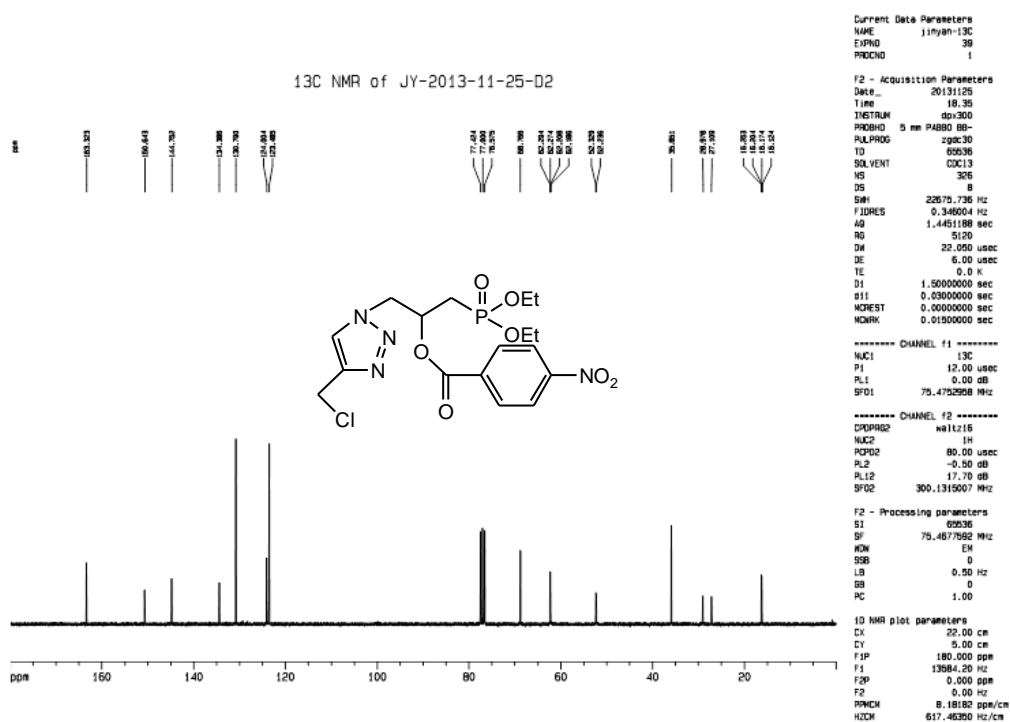Figure S122.  $^{31}\text{P}$ -NMR spectrum of compound 5-D2.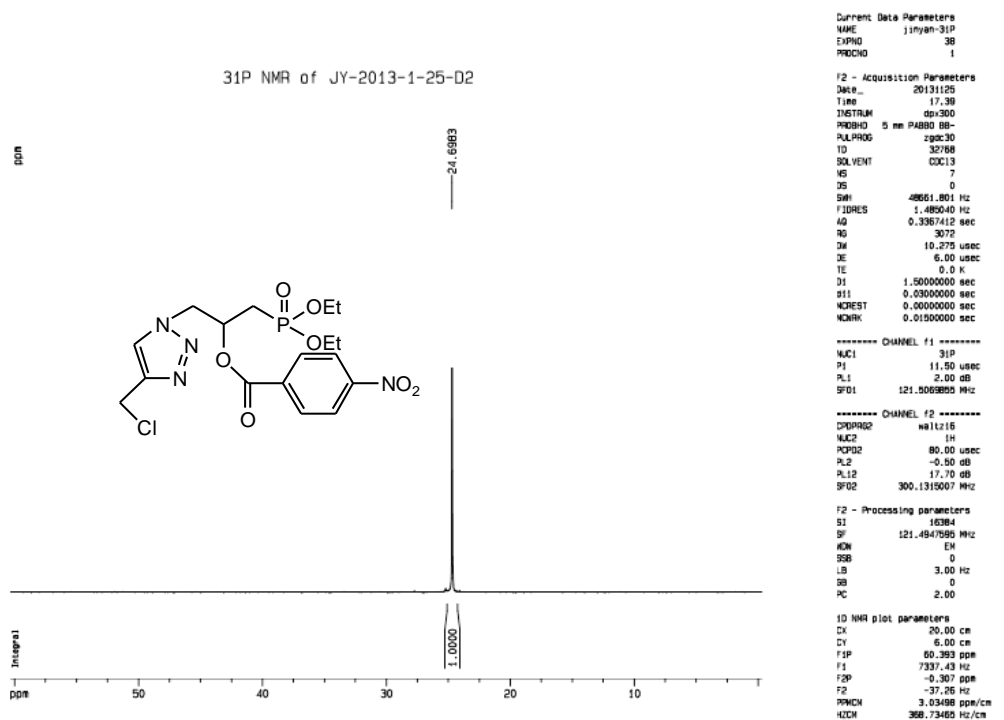

Figure S123. HRMS spectrum of compound 5-D2.

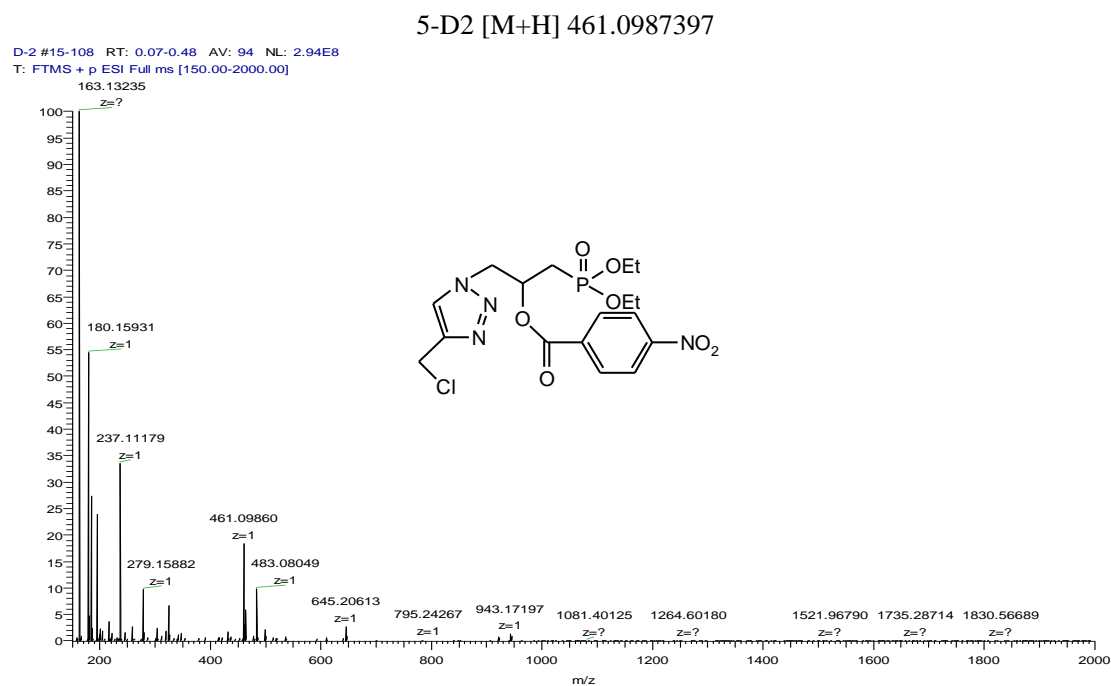

Figure S124. HRMS spectrum of compound 5-D2.

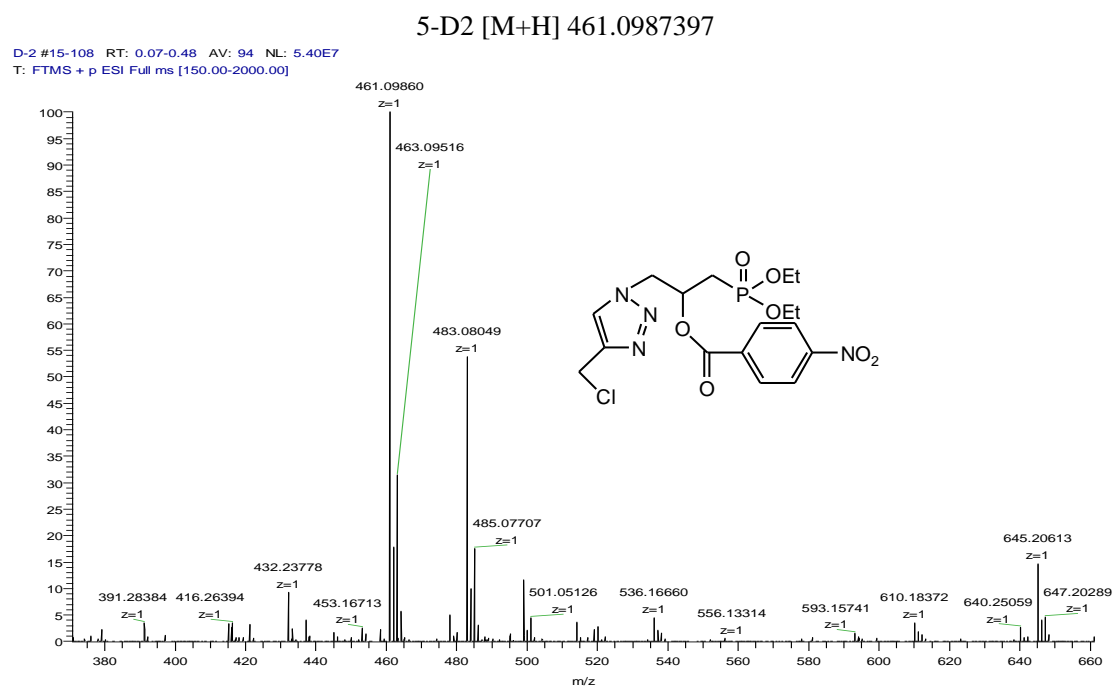

Figure S125.  $^1\text{H}$ -NMR spectrum of compound 5-D3.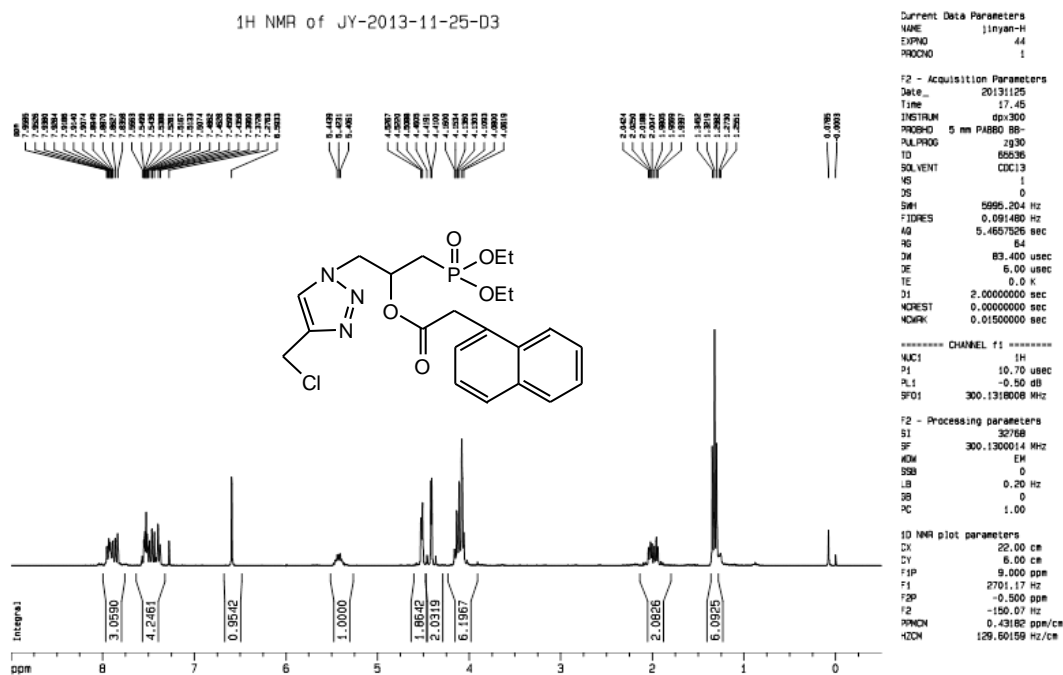Figure S126.  $^{13}\text{C}$ -NMR spectrum of compound 5-D3.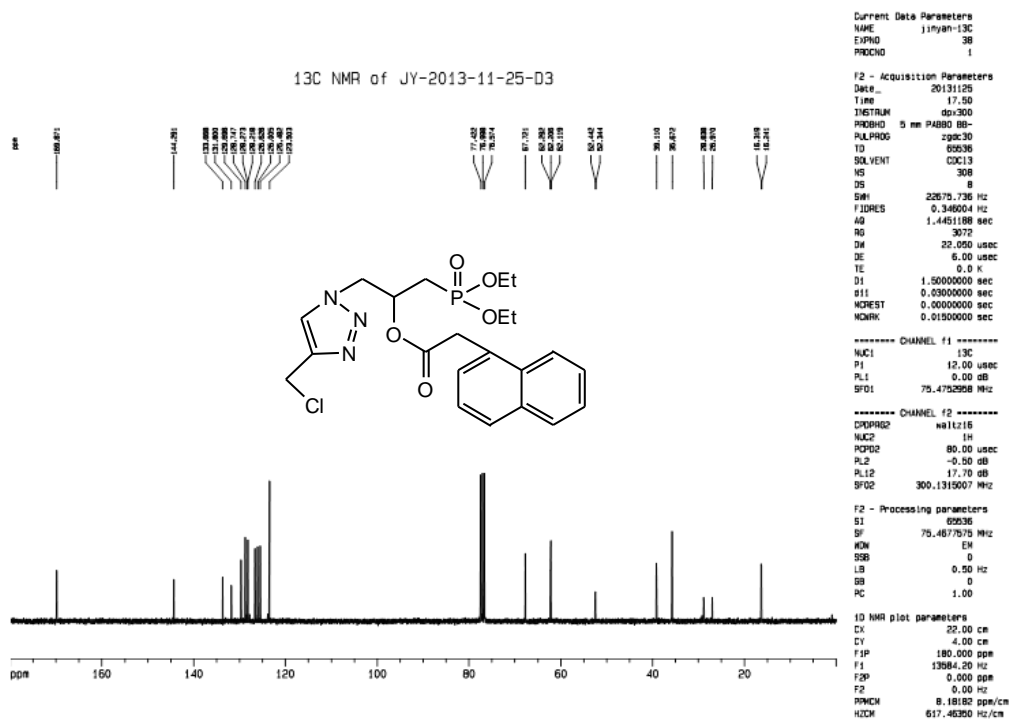

Figure S127.  $^{31}\text{P}$ -NMR spectrum of compound 5-D3.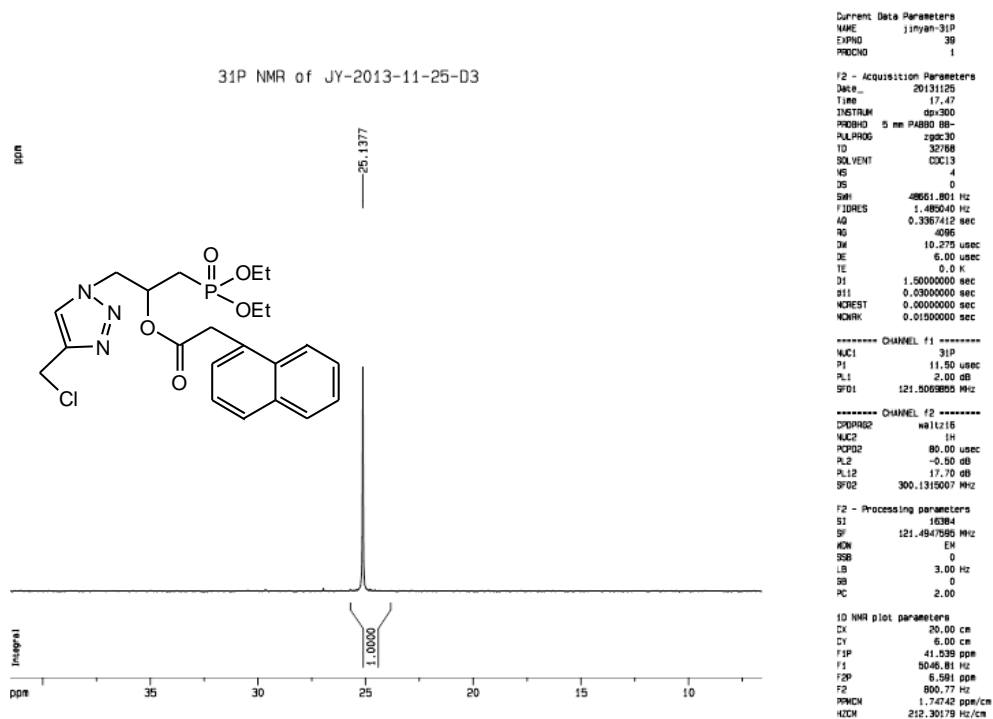

Figure S128. HRMS spectrum of compound 5-D3.

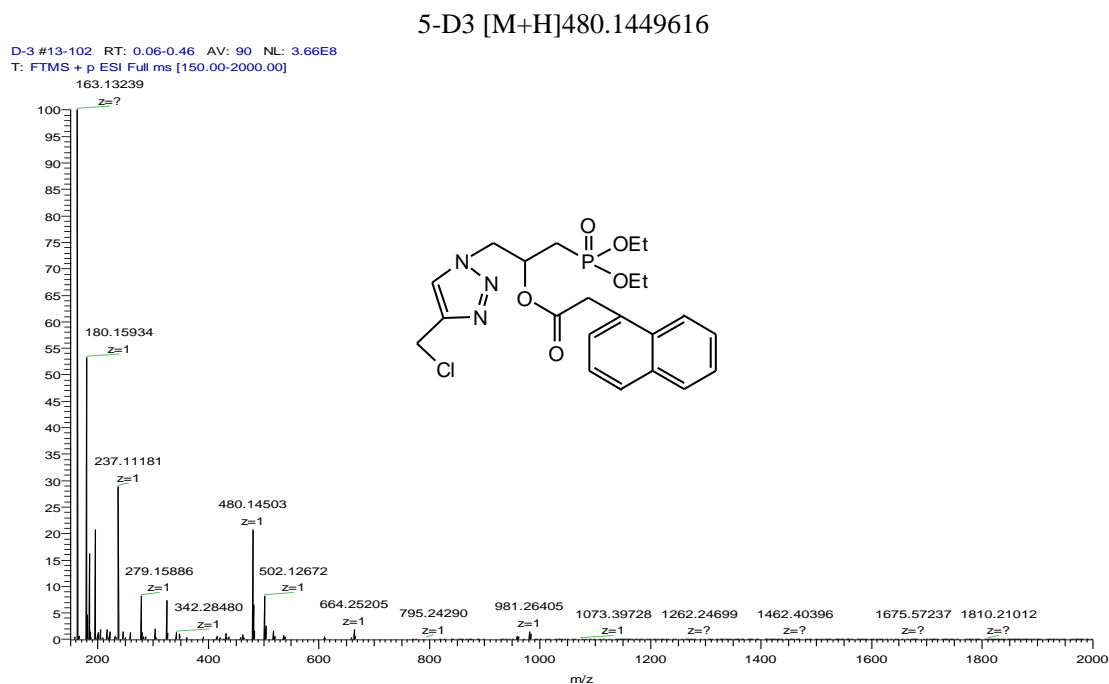



Figure S129. HRMS spectrum of compound 5-D3.

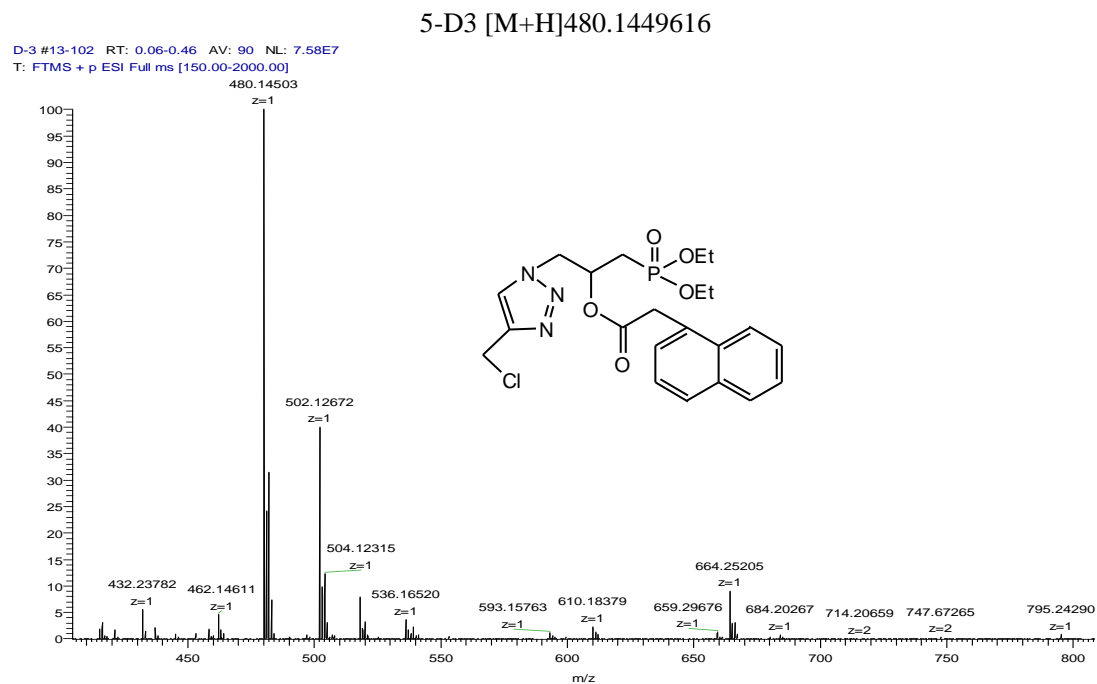Figure S130. <sup>1</sup>H-NMR spectrum of compound 5-D4.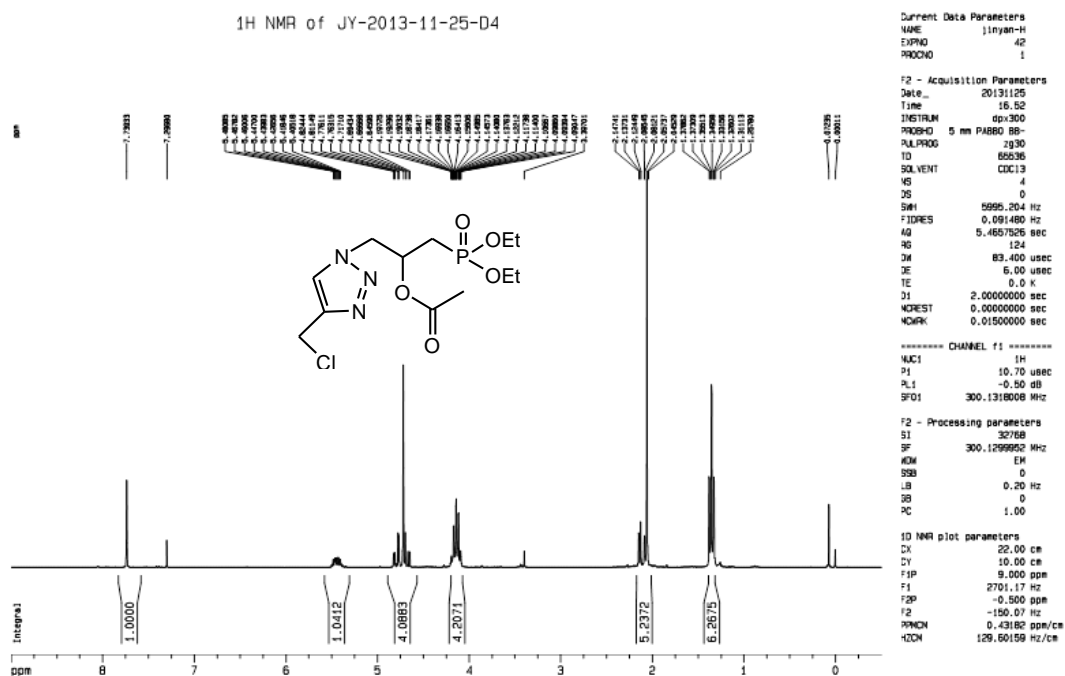

Figure S131.  $^{13}\text{C}$ -NMR spectrum of compound 5-D4.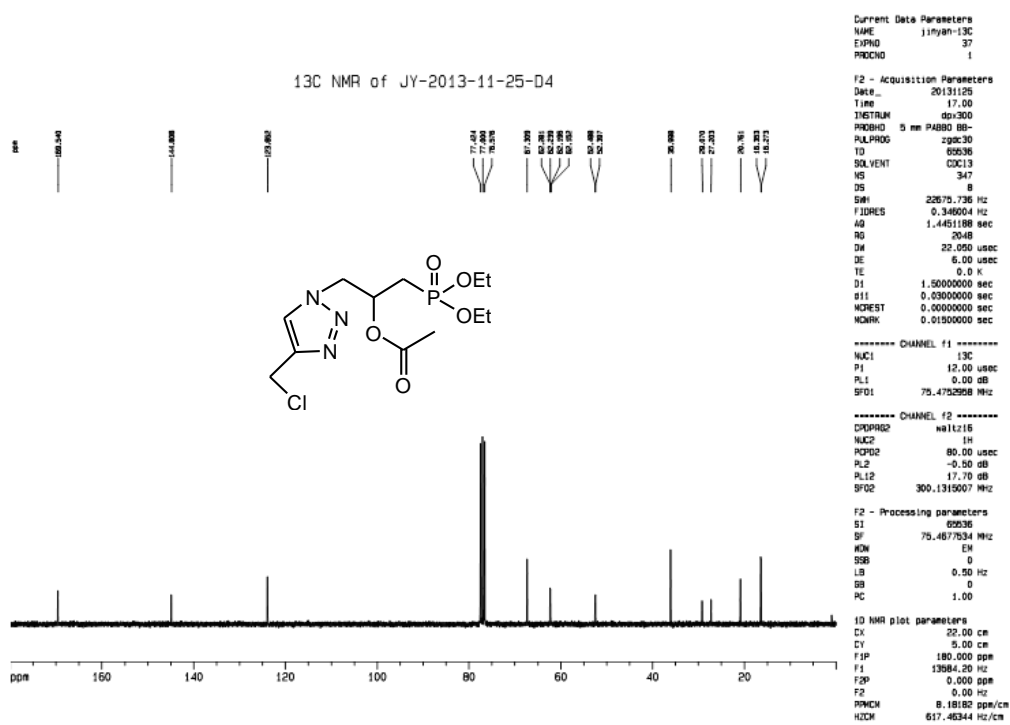Figure S132.  $^{31}\text{P}$ -NMR spectrum of compound 5-D4.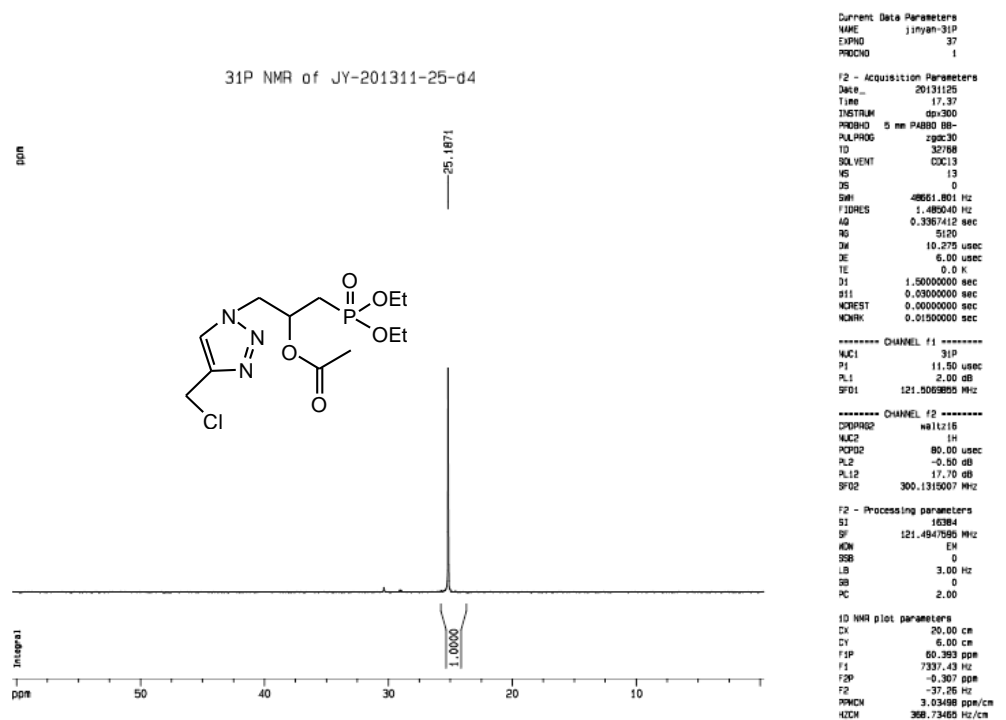

Figure S133. HRMS spectrum of compound 5-D4.

5-D4 [M+H]<sup>+</sup>354.0980115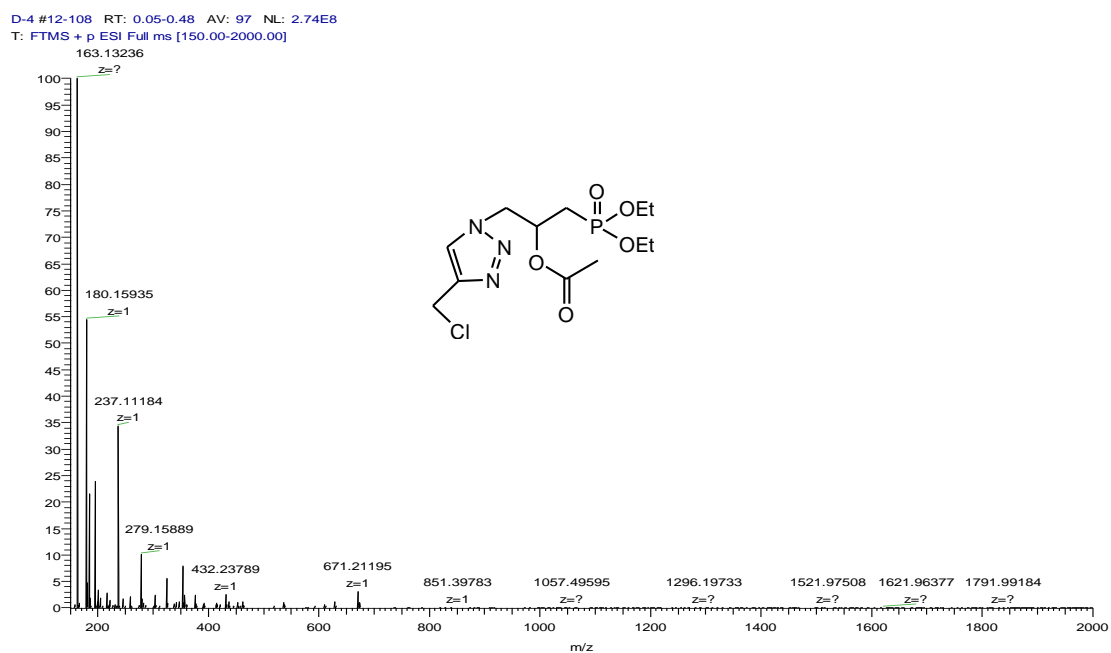

Figure S134. HRMS spectrum of compound 5-D4.

5-D4 [M+H]<sup>+</sup>354.0980115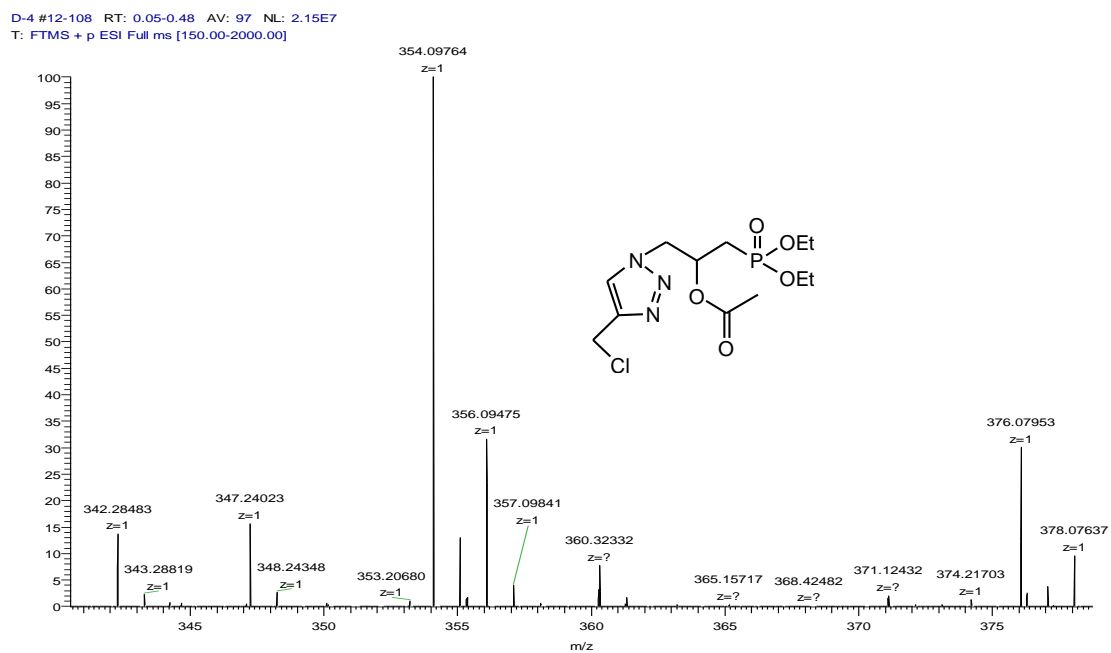

Figure S135.  $^1\text{H-NMR}$  spectrum of compound 5-D5.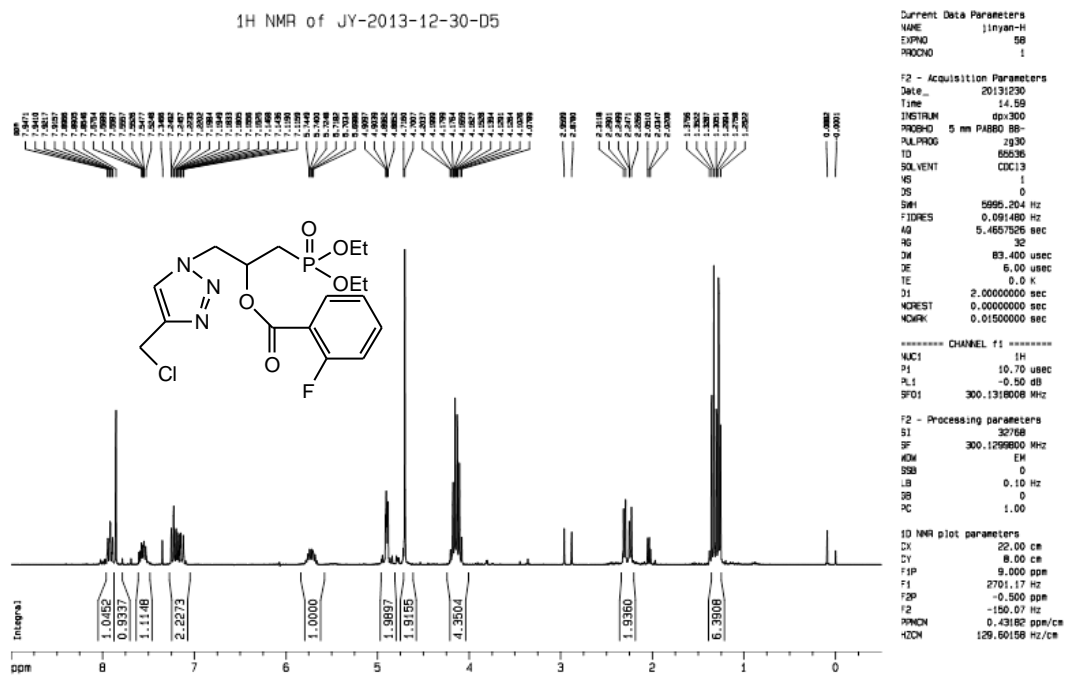Figure S136.  $^{13}\text{C-NMR}$  spectrum of compound 5-D5.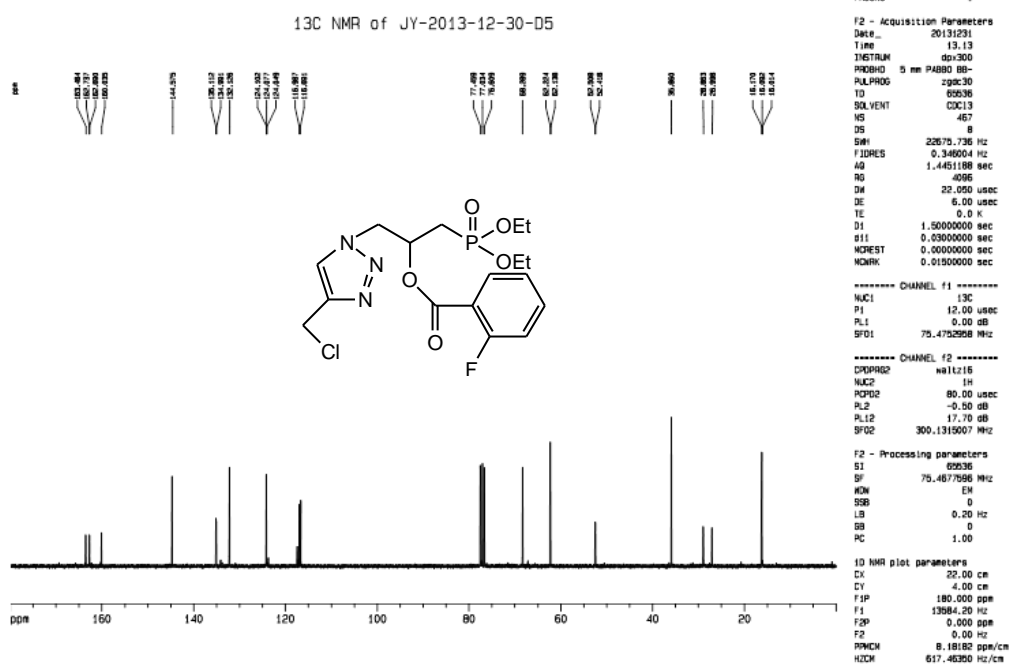

Figure S137.  $^{31}\text{P}$ -NMR spectrum of compound 5-D5.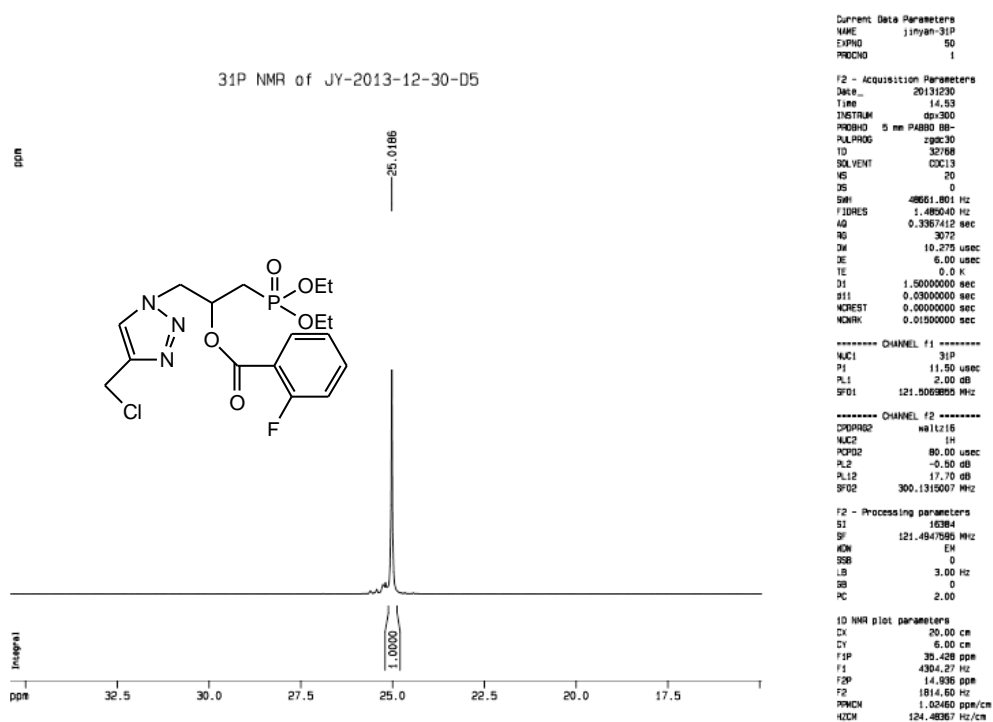

Figure S138. HRMS spectrum of compound 5-D5.

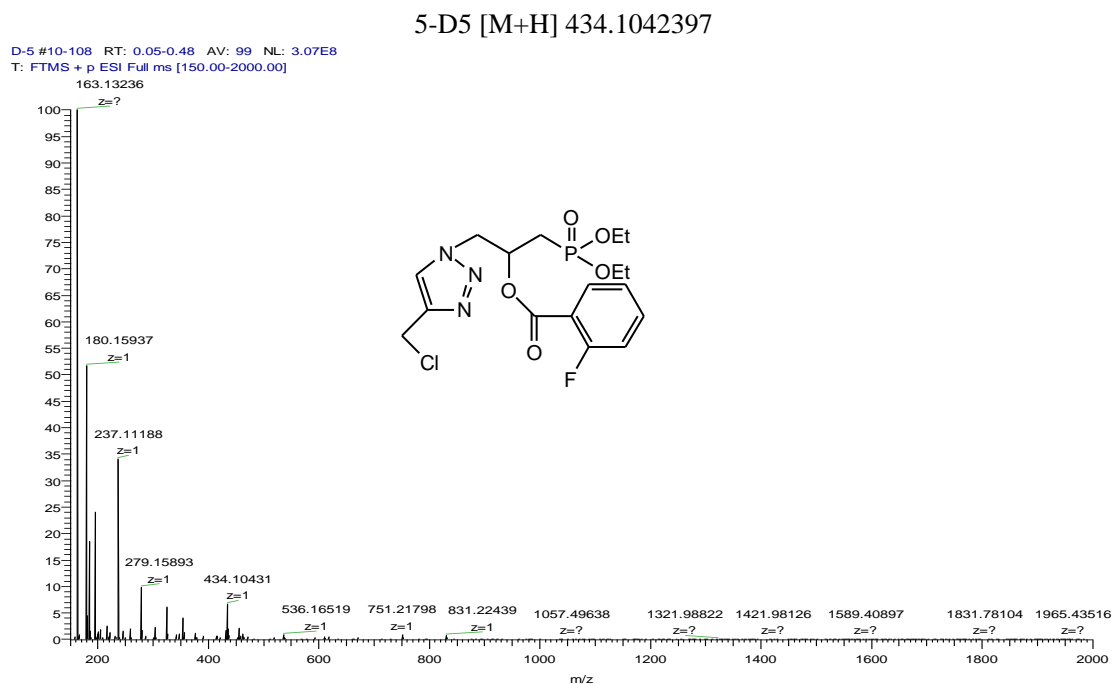

Figure S139. HRMS spectrum of compound 5-D5.

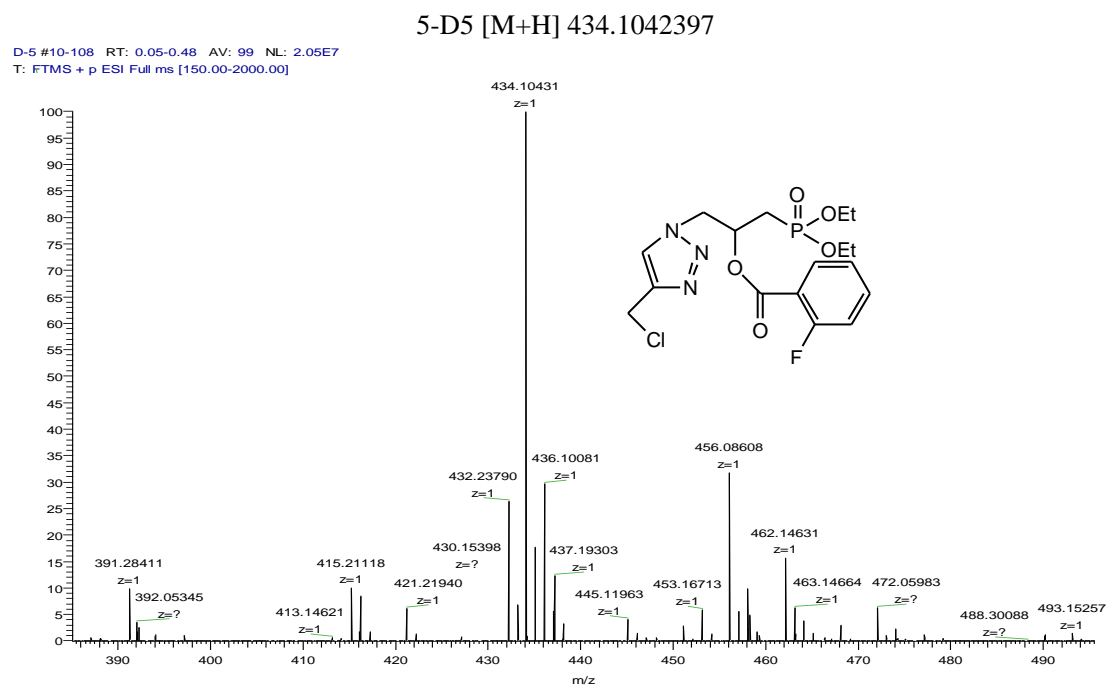Figure S140. <sup>1</sup>H-NMR spectrum of compound 5-D6.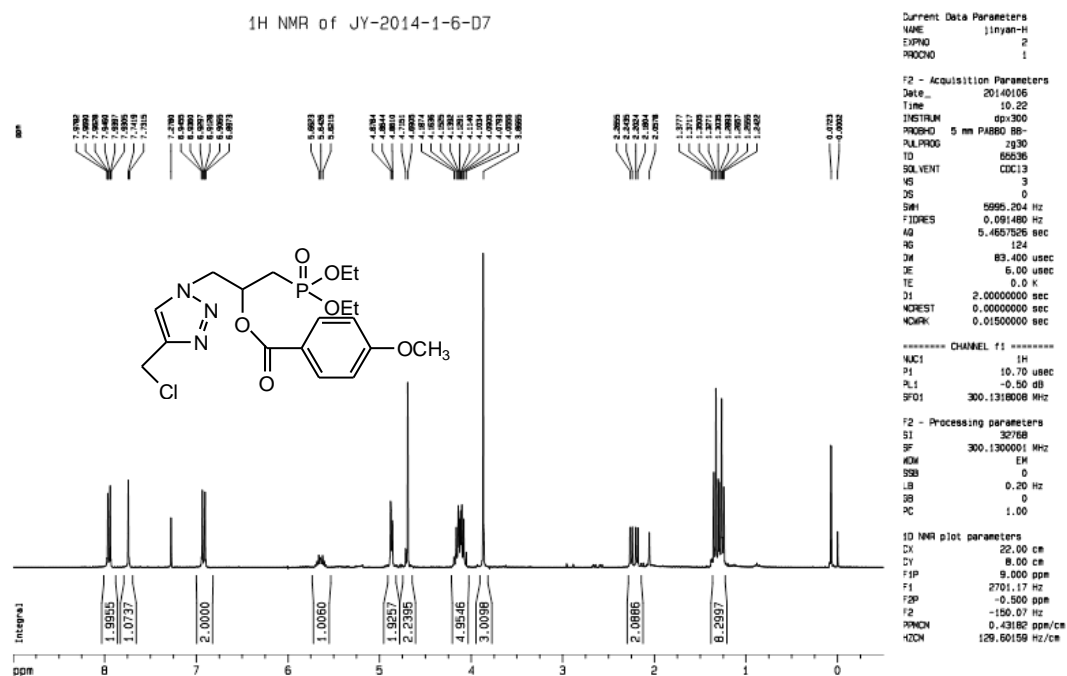

Figure S141.  $^{13}\text{C}$ -NMR spectrum of compound 5-D6.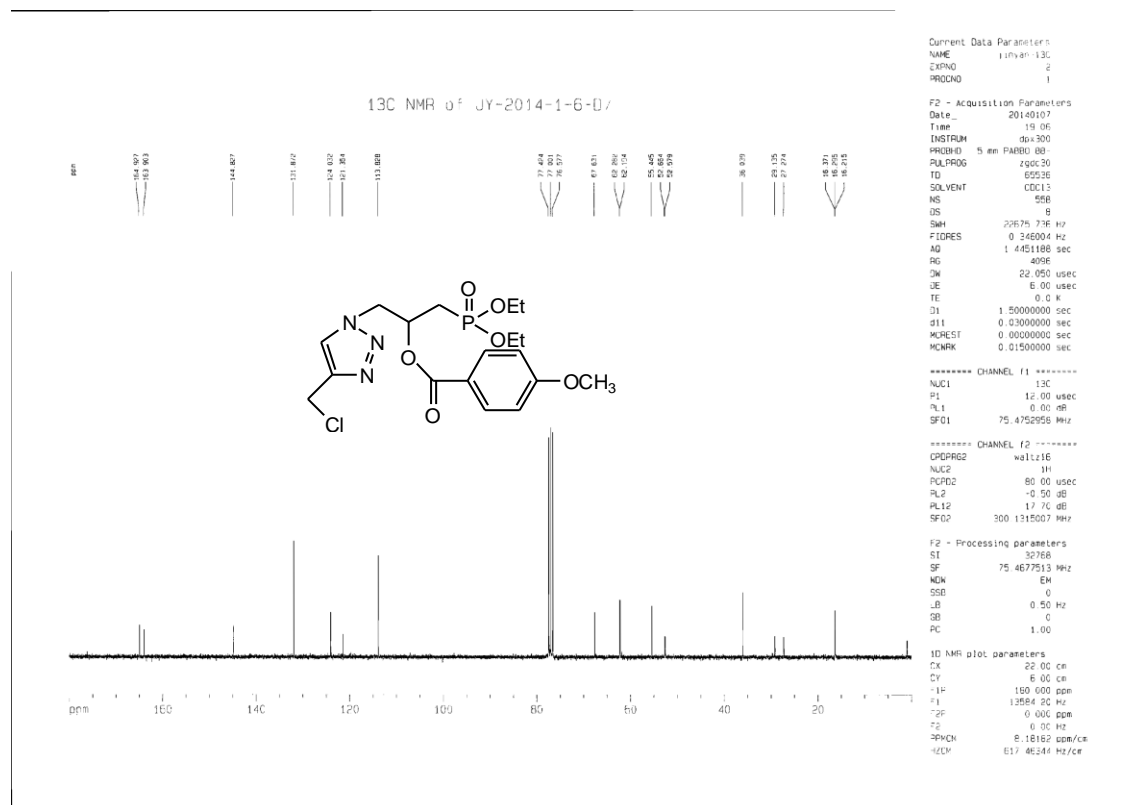Figure S142.  $^{31}\text{P}$ -NMR spectrum of compound 5-D6.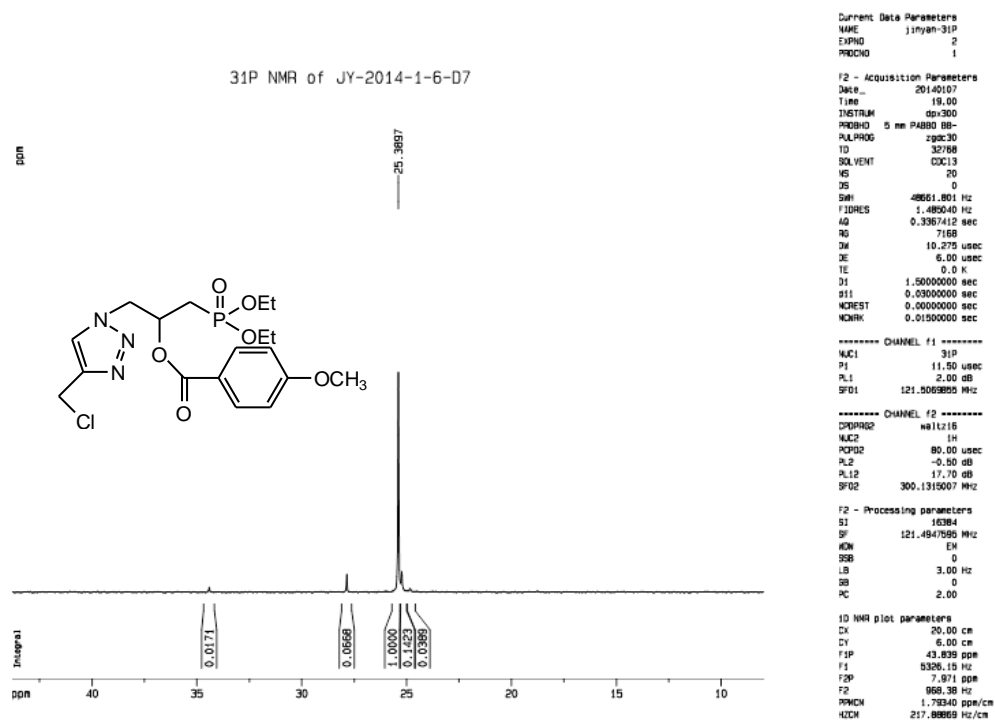

Figure S143. HRMS spectrum of compound 5-D6.

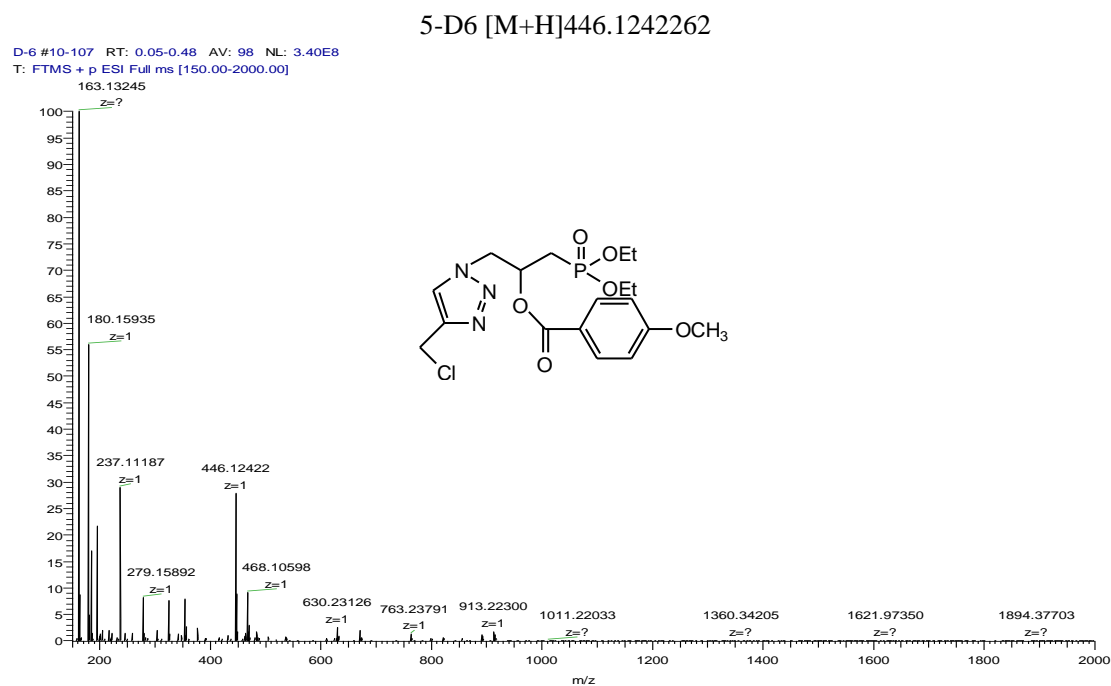

Figure S144. HRMS spectrum of compound 5-D6.

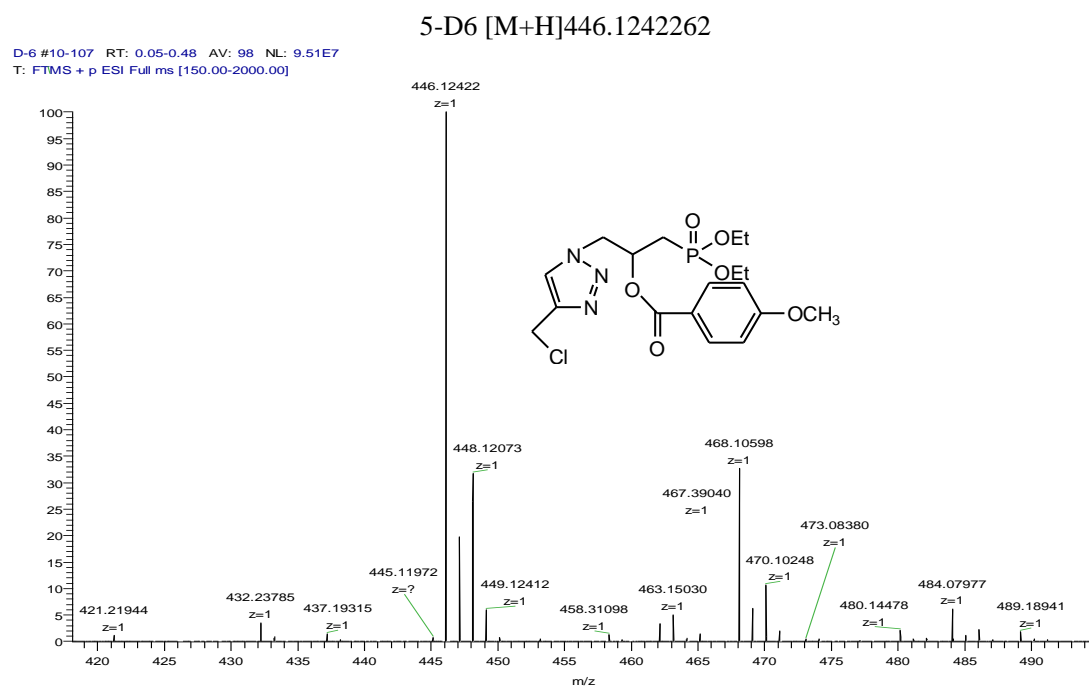



Figure S145. <sup>1</sup>H-NMR spectrum of compound 5-D7.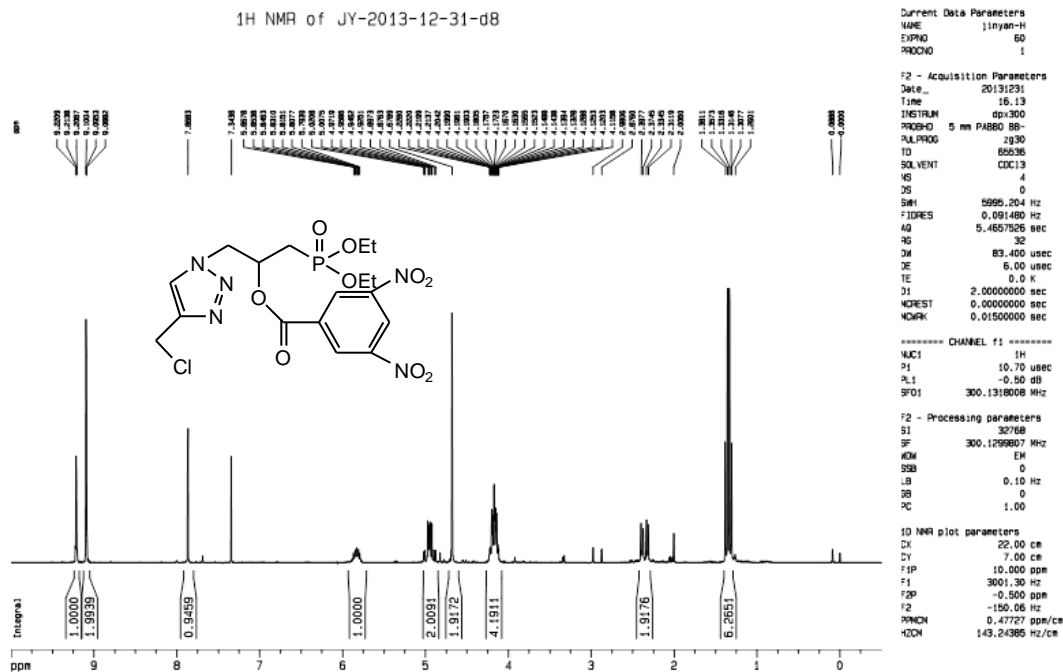Figure S146. <sup>13</sup>C-NMR spectrum of compound 5-D7.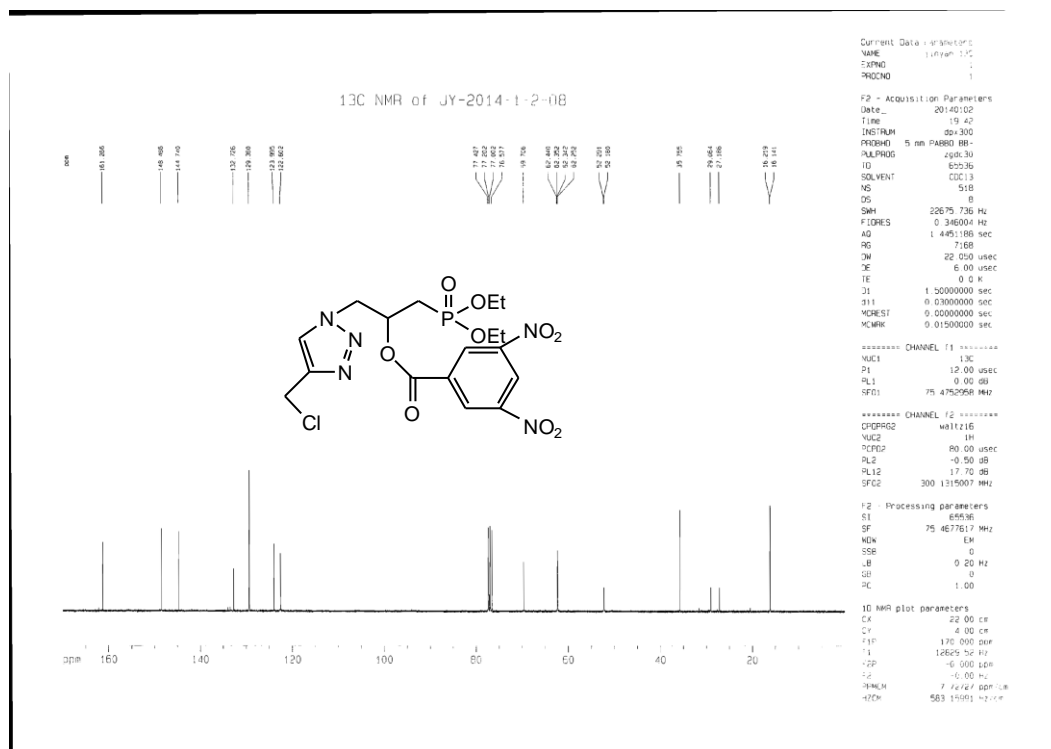

Figure S147.  $^{31}\text{P}$ -NMR spectrum of compound 5-D7.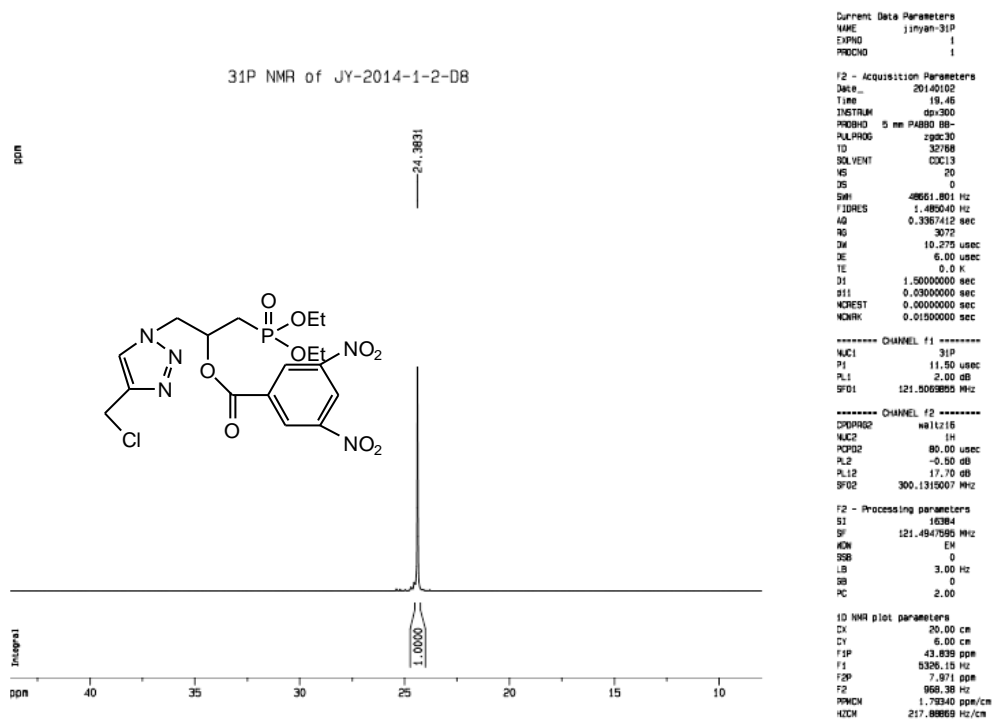

Figure S148. HRMS spectrum of compound 5-D7.

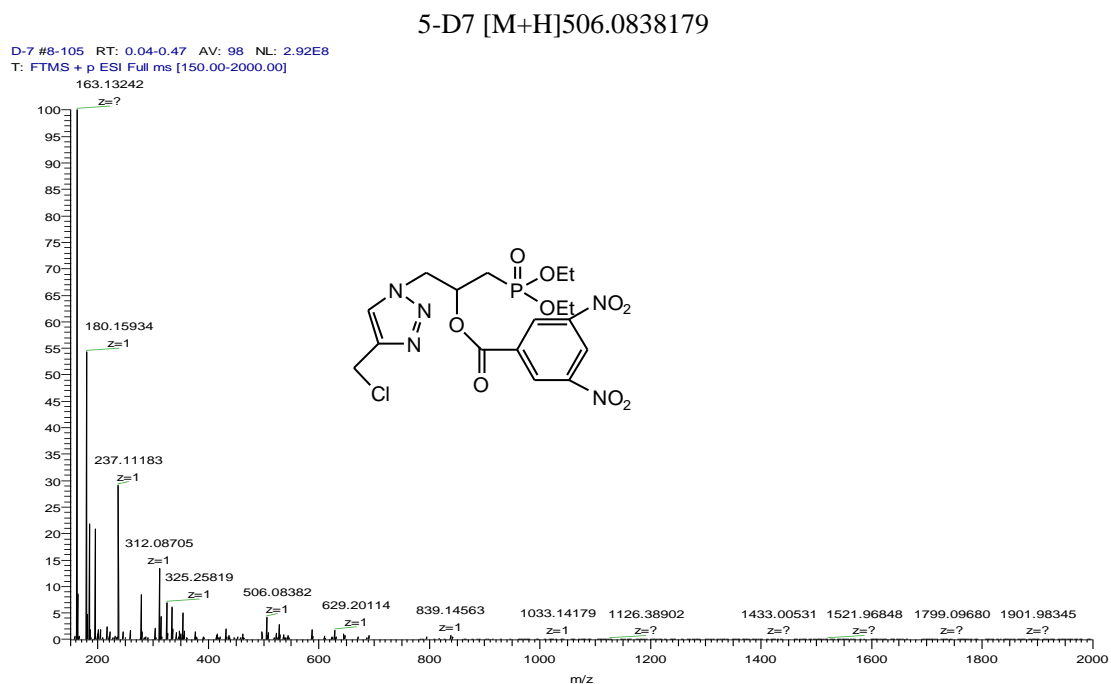

Figure S149. HRMS spectrum of compound 5-D7.

5-D7 [M+H]<sup>+</sup>506.0838179D-7 #8-105 RT: 0.04-0.47 AV: 98 NL: 1.22E7  
T:\FTMS + p ESI Full ms [150.00-2000.00]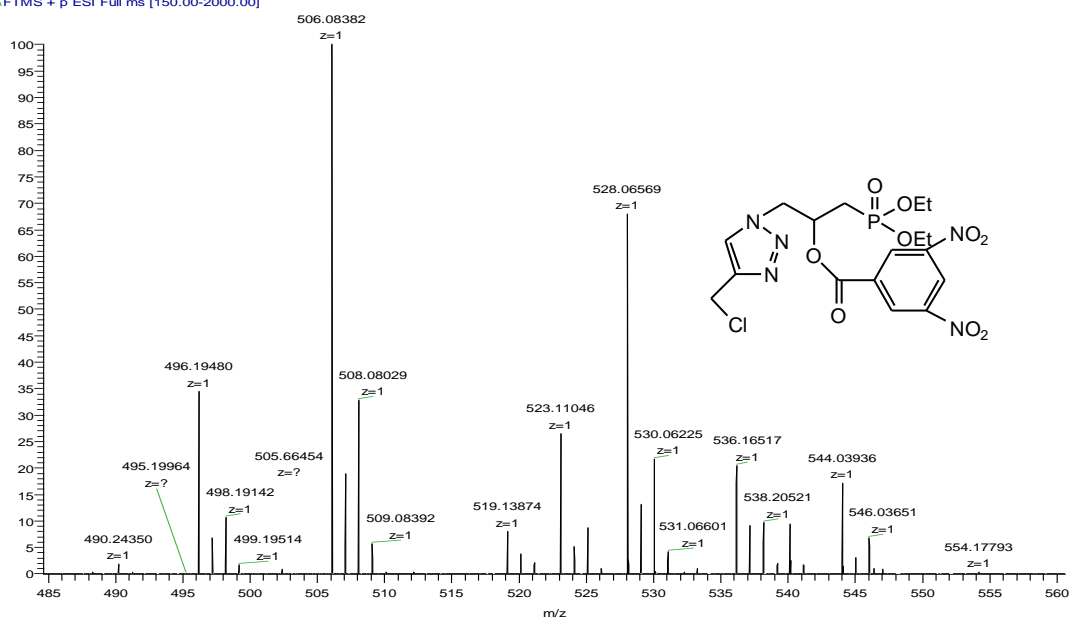

Supplement: molecules-20-01088-s001.pdf [file molecules-20-01088-s001.pdf]
